# PIWI-interacting RNAs piR-13643 and piR-21238 are promising diagnostic biomarkers of papillary thyroid carcinoma

Zhengyan Chang<sup>1,\*</sup>, Guo Ji<sup>1,\*</sup>, Runzhi Huang<sup>2,3,\*</sup>, Hong Chen<sup>4</sup>, Yaohui Gao<sup>1</sup>, Weifeng Wang<sup>5</sup>, Xuechen Sun<sup>1</sup>, Jie Zhang<sup>3,6</sup>, Jiayi Zheng<sup>1,7</sup>, Qing Wei<sup>1</sup>

<sup>1</sup>Department of Pathology, Shanghai Tenth People's Hospital, Tongji University School of Medicine, Shanghai

<sup>2</sup>Division of Spine, Department of Orthopedics, Tongji Hospital Affiliated to Tongji University School of Medicine, Shanghai, China

<sup>3</sup>Key Laboratory of Spine and Spinal Cord Injury Repair and Regeneration (Tongji University), Ministry of Education, Shanghai, China

<sup>4</sup>Center for Difficult and Complicated Abdominal Surgery, Shanghai Tenth People's Hospital, Tongji University School of Medicine, Shanghai, China

<sup>5</sup>Central Laboratory, Shanghai Tenth People's Hospital, Shanghai, China

<sup>6</sup>Department of Prevention, Tongji University School of Medicine, Tongji University, Shanghai, China

<sup>7</sup>Human Province Key Laboratory of Tumor Cellular and Molecular Pathology, Cancer Research Institute, University of South China, Hengyang, Hunan, China

\*Co-first authors and Equal contribution

**Correspondence to:** Jie Zhang, Jiayi Zheng, Qing Wei; email: [ziejzhang@tongji.edu.cn](mailto:ziejzhang@tongji.edu.cn), [231904000@qq.com](mailto:231904000@qq.com), [weiqing1971@126.com](mailto:weiqing1971@126.com)

**Keywords:** PIWI-interacting RNAs, thyroid cancer, biomarkers, diagnosis, nomogram

**Received:** December 17, 2019

**Accepted:** April 17, 2020

**Published:** May 19, 2020

**Copyright:** Chang et al. This is an open-access article distributed under the terms of the Creative Commons Attribution License (CC BY 3.0), which permits unrestricted use, distribution, and reproduction in any medium, provided the original author and source are credited.

## ABSTRACT

Emerging studies demonstrate that PIWI-interacting RNAs (piRNAs) participate in the development of cancers. 75 pairs of papillary thyroid carcinoma (PTC) samples and 31 benign thyroid nodule samples were included in this three-phase biomarker identifying study. First, piRNA expression profiles of five pairs of PTC samples were acquired piRNA sequencing. The expression of all upregulated piRNAs were further validated by RT-qPCR. Paired t and nonparametric test were used to evaluate the association between all upregulated piRNAs and clinic stage. The expression levels of key piRNAs were corrected by demographic data to construct a multivariate model to distinguish malignant nodules from benign. Additionally, the intersection between target genes of key piRNAs and differentially expressed genes in The Cancer Genome Atlas (TCGA) PTC samples were used to perform enrichment analysis. Only piR-13643 and piR-21238 were significantly upregulated in PTC and associated with clinic stage. Moreover, both piR-13643 (Area Under Curve (AUC): 0.821) and piR-21238 (AUC: 0.823) showed better performance in distinguishing malignant nodules from benign than currently used biomarkers HBME1 (AUC: 0.590). Based on our findings, piR-13643 and piR-21238 were observed to be significantly upregulated in human PTC. PIWI-interacting RNAs could serve as promising novel biomarkers for accurate detection of PTC.

## INTRODUCTION

Papillary thyroid carcinoma (PTC) is identified as the dominating histological subtype of thyroid cancer,

approximately accounting for 87% of the thyroid malignant diagnosed in the US [1]. The incidence of new thyroid cancer has increased by an average rate of 3.1% each year over the last decade. PTC metastasizes

primarily through the lymph nodes, which increases the risk of postoperative recurrence [2]. Currently, in the field of early detection of PTC, imaging and ultrasound are the predominant screening methods. Although these methods are helpful for the detection of PTC, the screening effectiveness sometimes is limited by the depth and size of the lesion [3, 4]. Thus, it is essential to develop a simple and effective tissue-based test that improves diagnostic rates for PTC. Recently, various biomolecules including proteins, DNA, mRNAs, and miRNAs have shown great potential in several previous studies to serve as new biomarkers for the prognosis prediction, and diagnosis of PTC [5–7]. Novel biomarkers based on these molecules may be suitable for diagnosis and monitoring disease progression of PTC.

Numerous studies have discovered a category of non-coding RNAs called P-element induced Wimpy testis (PIWI)-interacting RNAs (piRNAs) that are abundant in various types of tissues [8, 9]. PiRNAs are a class of small non-coding RNAs of 26–31 nucleotides in length interacting with PIWI proteins, which can post-transcriptionally and epigenetically silence the transposable elements in germline stem cells [10–13]. Besides, the expression levels of piRNAs have been reported to associate with the tumorigenesis and progression of several types of cancers [14–16]. Because of their small size, piRNAs are not readily degraded by ribonucleases and can allodially pass through cell membranes [17]. Although changes in piRNA levels have recently been linked to human diseases, their roles and functions in malignancy remain unclear. Investigations of the possible clinical relevance and biological functions of piRNAs in PTC are still in early stages.

PTC is a relatively indolent cancer based on investigations using imaging and fine-needle aspiration (FNA) biopsy. Although PTC patients often have good prognosis, some patients still die of tumor recurrence and metastasis. Therefore, early diagnosis and prediction of tumor metastasis are crucial to the prognosis of some patients. We have found that some PTC patients did not have typical morphological characteristics and molecular biological phenotypes, such as BRAF mutations. The purpose of this study is to find biomarkers that could be used in combination with traditional biomarkers, such as BRAF mutations and immunohistochemical staining of HBME1, to optimize the early diagnosis of PTC.

To the best of knowledge, this study compared the expression of piRNAs in PTC and normal thyroid tissues by Next Generation Sequencing (NGS) in concert with subsequent Reverse Transcription

Quantitative Polymerase Chain Reaction (RT-qPCR) validation firstly. The aim of this study was to identify piRNAs with abnormal expression in PTC, which also had diagnostic or differential diagnostic value and could potentially serve as biomarkers for early detection of PTC. The results of this study might provide novel biomarkers for the accurate detection of PTC.

## RESULTS

### Differential expression analysis

The three-phase study design is described in Figure 1. Clinical and pathological characteristics of the PTC tissue samples are summarized in Table 1. In total, ten small RNA libraries of five pairs of PTC and normal solid tissue were prepared and sequenced. Compared to normal tissues, the expression of 35 piRNAs were found to be significantly abnormal in PTC tissues (Figures 2A, 2B, and 3A). Based on the selection criteria of differential expression genes (DEGs) described in the methods, five piRNAs were chosen for further RT-qPCR evaluation (Table 2). Among these five, piRNA-26131, piR-13643 and piR-21238 were also differentially expressed in RT-qPCR data and selected for the further analysis (Figure 3B).

### Quantification of upregulated piRNAs by RT-qPCR

The expression levels of piR-13643 ( $P < 0.001$ , Figure 4A;  $P = 0.044$ , Figure 5A) and piR-21238 ( $P < 0.001$ , Figure 4D) ( $P = 0.271$ , Figure 5D) were higher in PTC tissues than in non-cancerous tissue controls in both fresh and paraffin-embedded samples. In addition, the receiver operating characteristic (ROC) curves indicated good discrimination of piR-13643 (AUC = 0.813, Figure 4B) (AUC = 0.842, Figure 5B) and piR-21238 (AUC = 0.820, Figure 4E) (AUC = 0.829, Figure 5E) from controls in the diagnosis of PTC. Furthermore, the expression of piR-13643 ( $P = 0.026$ , Figure 4C;  $P = 0.002$ , Figure 5C) and piR-21238 ( $P = 0.011$ , Figure 4F;  $P = 0.004$ , Figure 5F) increased significantly in samples of PTC at advanced clinical stages (Table 3).

### Construction of nomogram distinguishing malignant nodules from benign ones

HBME1 staining and BRAF<sup>V600E</sup> mutations were detected in less than 50% of the PTC samples, while the upregulation of piR-13643 and piR-21238 was detected in 62% of all PTC samples (Table 1 and Supplementary Figure 1 and Supplementary Material 1). The expression levels of these two key piRNAs were corrected by demographic data to construct a multivariate model to distinguish malignant from benign nodules (Figure 6A). The calibration and ROC curves indicated acceptable

**Table 1. Clinicopathological characteristics of study subjects.**

| Clinical characteristic | Screening phase | Training phase | Validation phase |
|-------------------------|-----------------|----------------|------------------|
| Number                  | 5               | 54             | 21               |
| Age (years)             |                 |                |                  |
| < 45                    | 3               | 29             | 10               |
| ≥ 45                    | 2               | 25             | 11               |
| Gender                  |                 |                |                  |
| Male                    | 2               | 19             | 3                |
| Female                  | 3               | 35             | 18               |
| TNM stage               |                 |                |                  |
| Stage I                 | 4               | 33             | 15               |
| Stage II                | 0               | 3              | 4                |
| Stage III               | 1               | 9              | 0                |
| Stage IV                | 0               | 9              | 2                |
| Microcarcinoma          |                 |                |                  |
| Yes                     | 0               | 5              | 9                |
| No                      | 5               | 49             | 12               |
| Hashimoto's thyroiditis |                 |                |                  |
| Yes                     | 3               | 16             | 11               |
| No                      | 2               | 30             | 10               |
| Unkonwn                 | 0               | 8              | 0                |
| Multifocal              |                 |                |                  |
| Yes                     | 1               | 4              | 3                |
| No                      | 4               | 50             | 18               |
| LN metastasis           |                 |                |                  |
| Yes                     | 4               | 38             | 6                |
| No                      | 1               | 16             | 15               |
| HMBE1                   |                 |                |                  |
| -                       | 1               | 26             | 11               |
| +                       | 3               | 13             | 6                |
| ++                      | 1               | 15             | 4                |
| BRAF                    |                 |                |                  |
| WT                      | 2               | 13             | 21               |
| V600E                   | 3               | 41             | 0                |
| Recurrence              |                 |                |                  |
| Yes                     | 4               | 18             | 6                |
| No                      | 1               | 36             | 15               |
| Metastasis              |                 |                |                  |
| Yes                     | 3               | 6              | 3                |
| No                      | 2               | 48             | 18               |

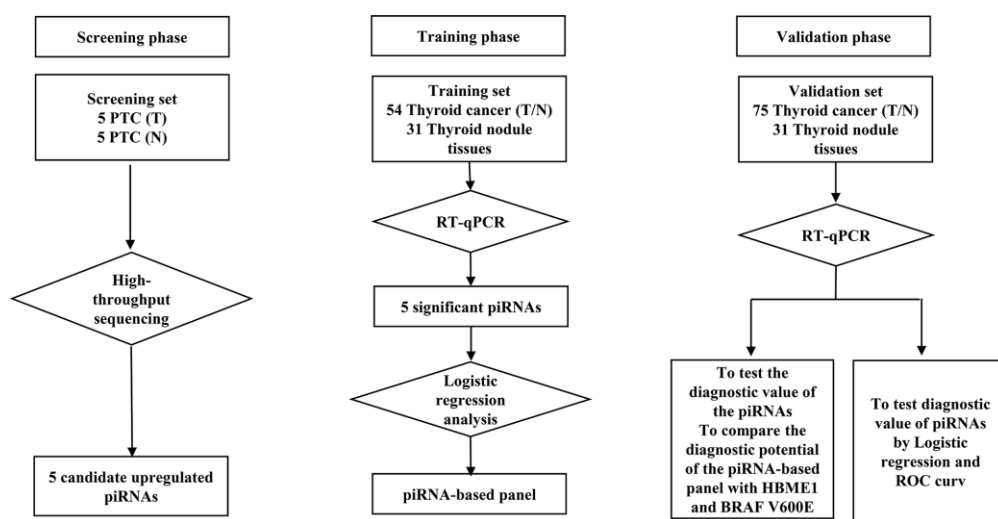

**Figure 1. Flow diagram of the study design illustrating how the patients and controls were divided into screening, training and validation phase of the study.**

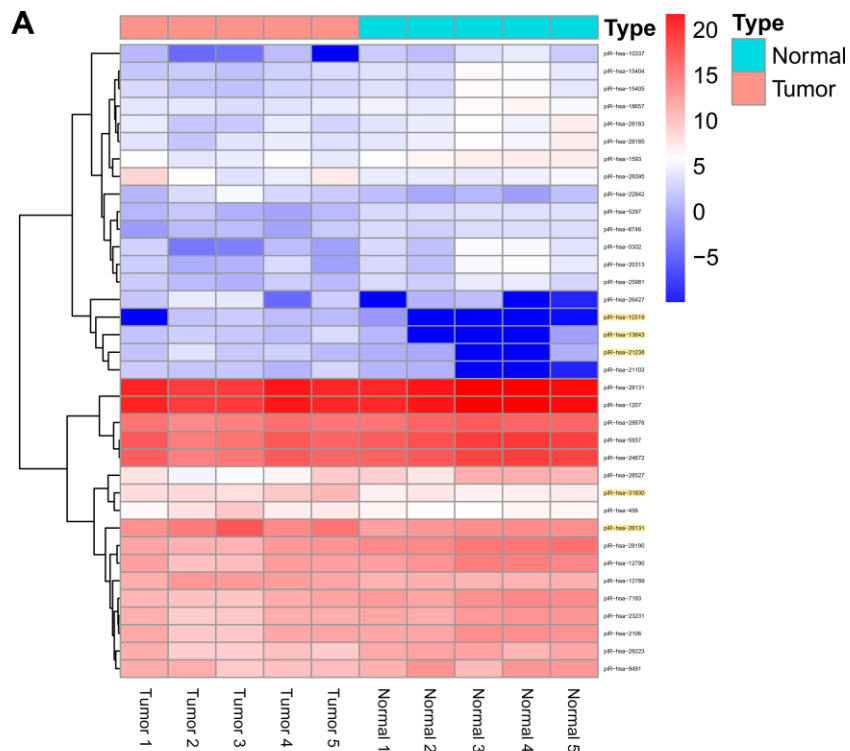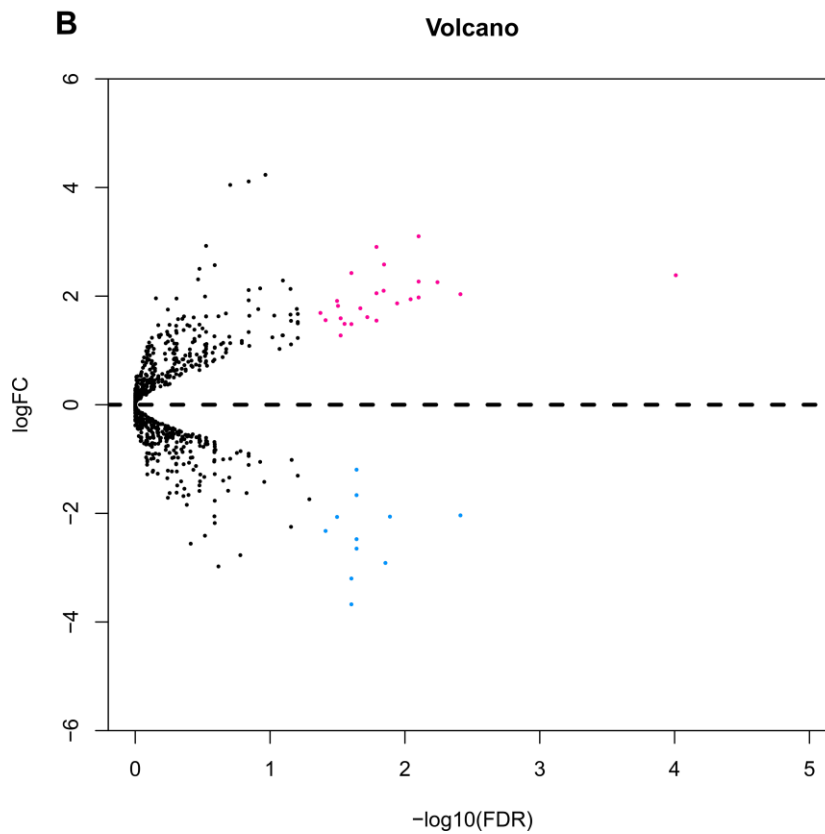

**Figure 2. Differential piRNAs changes in papillary thyroid carcinoma tissues compared with normal thyroid. (A)** Result of hierarchical clustering for top 35 differential piRNAs. **(B)** Result of volcano for five pairs of papillary thyroid carcinoma tissues.

**Table 2. The list of piRNAs significantly upregulated in tumor tissue of papillary thyroid carcinoma compared to normal tissue by next-generation sequencing.**

| Up-regulated piRNA | Fold change | FDR      |
|--------------------|-------------|----------|
| piR-hsa-31830      | 4.409006161 | 5.77E-05 |
| piR-hsa-13643      | 7.228884305 | 0.000239 |
| piR-hsa-26131      | 5.03247354  | 0.000455 |
| piR-hsa-12519      | 16.39352629 | 0.00082  |
| piR-hsa-21238      | 6.841397067 | 0.000849 |

Abbreviation: PIWI-interacting RNAs (piRNAs); Fold Change (FC).

data calibration and discrimination of the nomogram, respectively (Figure 6B, 6C). Both piR-13643 (AUC: 0.821) and piR-21238 (AUC: 0.823) showed better performance in distinguishing malignant from benign nodules than HBME1 staining alone (AUC: 0.590). Expression of piR-13643 ( $P < 0.001$ ) and piR-21238 ( $P = 0.061$ ), and staining of HBME1 ( $P = 0.009$ ) were higher in PTC nodules compared with benign nodules in both fresh and paraffin-embedded samples (Figure 6D–6F). In some patients, we found examples of HBME1 staining in benign nodules and non-staining in PTC nodules (Supplementary Figure 2).

### Identification of key piRNAs potential downstream mechanisms

The RNAhybrid algorithm determined that there were 2,711 and 11,192 potential target genes of piR-13643 and piR-21238, respectively [51]. FASTA sequence files of piR-13643 (<https://www.ncbi.nlm.nih.gov/nucleotide/DQ583334>) and piR-21238 (<https://www.ncbi.nlm.nih.gov/nucleotide/DQ590959>) were obtained from the NCBI Nucleotide database. The target binding sites of piR-13643 and piR-21238 are presented in Supplementary Material 2.

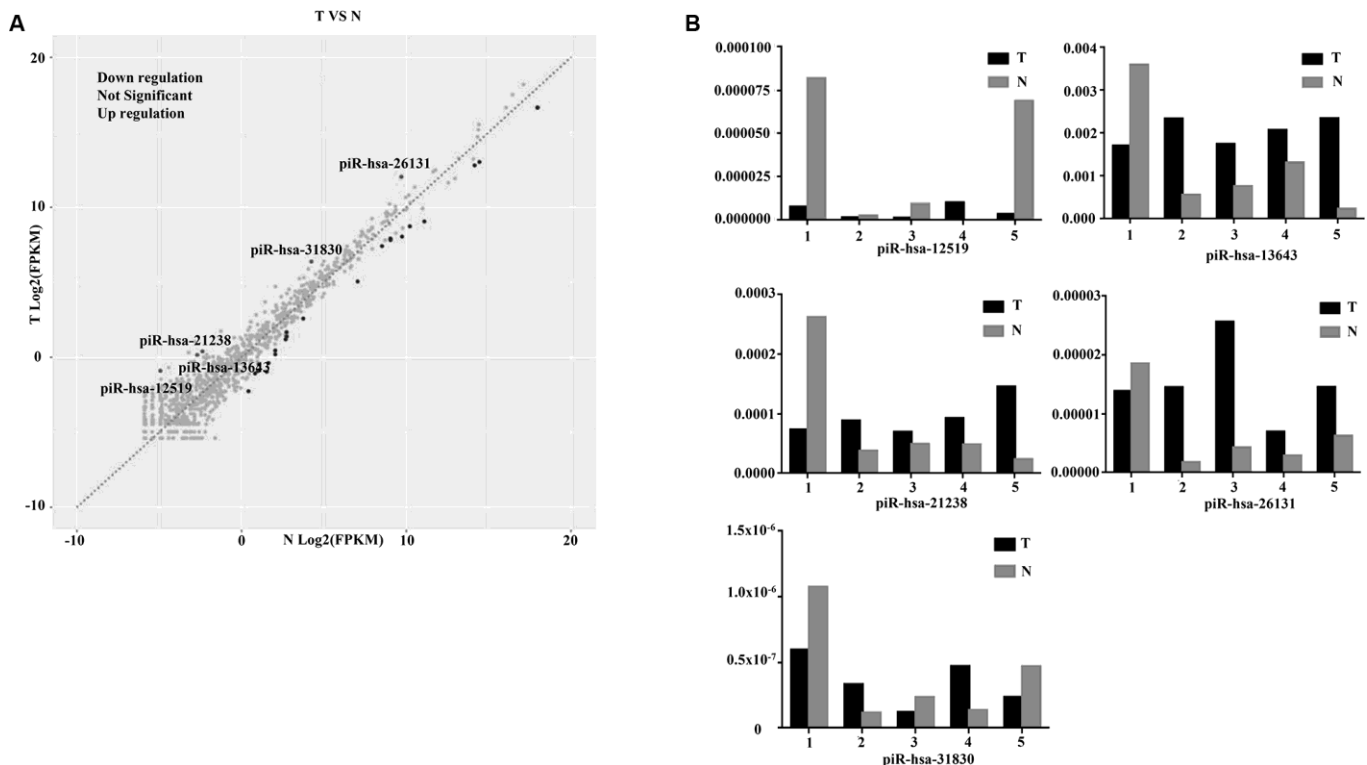

**Figure 3. Diagnostic performance of piR-13643 and piR-21238 in the screening phase of the study. (A)** The scatter plot was used for assessing the piRNAs expression variation. **(B)** Based on the results of NGS, five piRNAs (piR-31830, piR-13643, piR-26131, piR-12519, piR-21238) were chosen as potential endogenous controls for normalization of RT-qPCR data.

Based on the data from The Cancer Genome Atlas Thyroid Cancer project (TCGA-THCA), 5,555 DEGs in PTC tissues were identified (Figure 7A, 7B). Between primary PTC with and without metastasis, 468 DEGs were identified (Figure 7C, 7D). Of all the DEGs identified, 306 were potential target genes of piR-13643 and 1,434 were potential target genes of piR-21238 (Figure 7E–7H). Functional enrichment analysis suggested that some important gene ontologies and pathways such as “skeletal system development”, “extracellular structure organization”, “PI3K–Akt signaling pathway”, and “MAPK signaling pathway” might be potential downstream targets of piR-13643 and piR-21238. A mechanism diagram of the most reported piRNA downstream targets in cancer (Figure 8) was obtained from a review of the literature [17–21].

## DISCUSSION

The data from the Epidemiology, Surveillance, and End Results (SEER) indicate that about 1.2% of the population will be diagnosed with thyroid cancer during

their lifetime in recent years [22]. By an average incidence of 3.1% and death rates of 0.7% each year, the number of thyroid cancer patient has increased over the last decade [2, 23, 24]. As the aging population degree deepens, there will be more and more elderly PTC patients with long-term survival.

Despite such a dramatic rise in incidence and mortality of PTC has remained stable in recent years, there are more and more widespread over-diagnosis cases that is not destined to cause death or clinical illness [25–27]. In clinical practice, most of these cases are due to the lack of effective indicators for early diagnosis of PTC and differential diagnosis of benign and malignant thyroid nodules. Besides, some patients with thyroid nodules are excessive anxiety, further causing excessive treatment, which also greatly increase the medical expenses for maintaining thyroid function. And the dysfunction caused by surgical complications result in the burden of the family and society. Consequently, efforts to reduce thyroid cancer mis-detection and misdiagnosis are clearly warranted [27, 28].

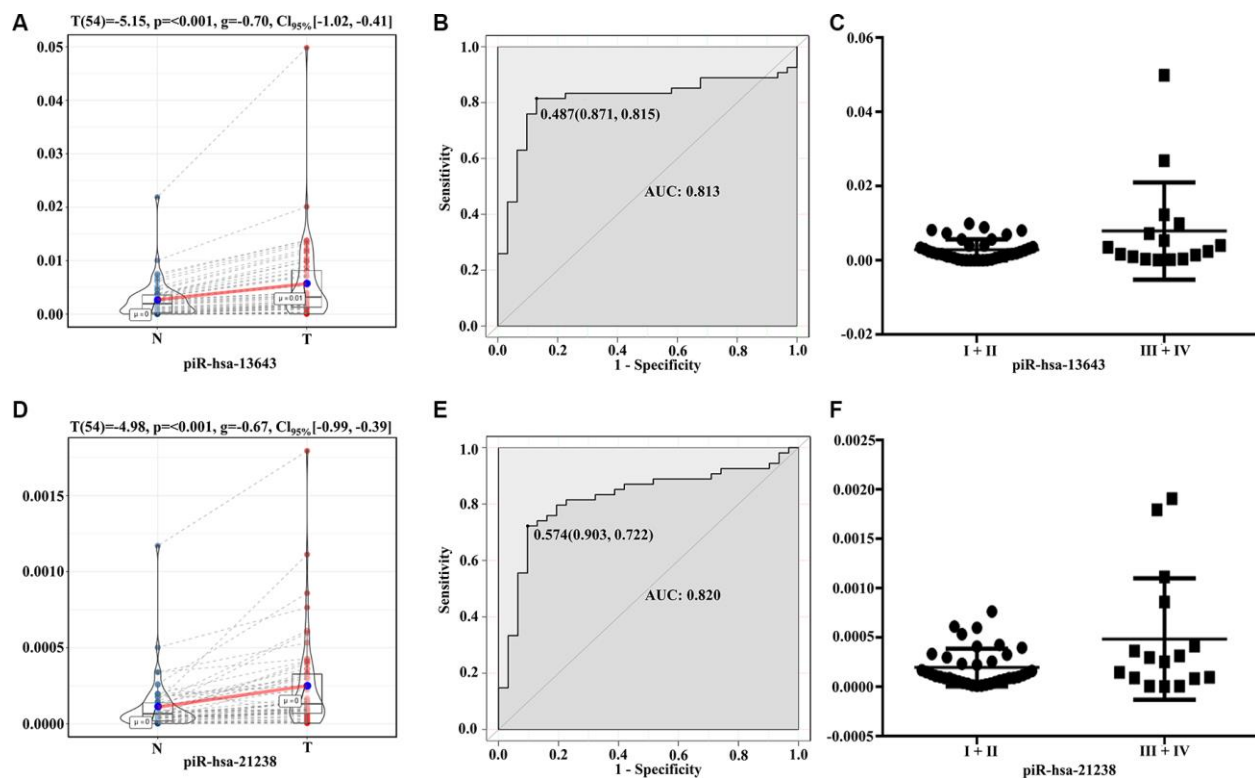

**Figure 4. Diagnostic performance of piR-13643 and piR-21238 in the training phase of the study.** (A) The expression of piR-13643 is significantly upregulated in tumor tissue of papillary thyroid carcinoma patients compared to normal tissue ( $P < 0.001$ ). (B) ROC analyses based on the expression of piR-13643 (AUC = 0.813). (C) The levels of piR-13643 increase significantly with advanced clinical stage ( $P = 0.0258$ ). (D) The expression of piR-21238 is significantly upregulated in tumor tissue of papillary thyroid carcinoma patients compared to normal tissue ( $P < 0.001$ ). (E) ROC analyses based on the expression of piR-21238 (AUC = 0.820). (F) The levels of piR-21238 decrease significantly with advanced clinical stage ( $P = 0.0112$ ). \* $P < 0.05$ ; \*\* $P < 0.01$ ; \*\*\* $P < 0.001$

In terms of pathological diagnosis, FNA is a critical tool in the diagnosis of thyroid malignancy. As the tumor progression to terminal stage, it develops invasive growth, capsular/vascular invasion and metastasis, which has typical morphological features [29]. And diagnosis is not difficult at this stage. However, the more advanced the tumor, the fewer opportunities and treatments there are for the patients. Because the diagnosis of PTC relies heavily on morphology, diagnosing PTC can be particularly challenging in early stage specimens with low cellularity [30].

Since thyroid cancer, especially PTC, has attracted increasing attention in tumor prevention and treatment in recent years, more and more studies have focused on specific diagnostic biomarkers for PTC. For example, galectin-3 has been reported to have more than 70% sensitivity and more than 90% specificity in diagnosis of PTC. Although galectin-3 has a great application prospect, it cannot be widely used in clinical practice due to the limitation of its detection technology [31, 32]. In

addition, BRAF<sup>V600E</sup> gene mutation is significantly associated with PTC recurrence and prognosis. A search of the TCGA-THCA database identified and characterized > 96% of driver mutations of PTC, finding BRAF (mutation in 59.7% PTC), NRAS (mutation in 8.5% PTC) and HRAS (mutation in 3.5% PTC) as the most common causative genes [33, 34]. Our data are consistent with previous studies confirming that BRAF<sup>V600E</sup> gene mutation is important in the diagnosis of PTC [35–37]. However, BRAF also has been reported to mutate in benign thyroid nodules and is not suitable for early diagnosis of thyroid cancer [30, 38, 39]. We have also found that, in clinical practice, nearly half of surgically defined PTC patients do not have BRAF<sup>V600E</sup> mutations. Therefore, there are still no effective biomarker for early diagnosis of PTC and distinguishing benign and malignant thyroid nodules [30].

Growing evidences have demonstrated the critical regulatory role of piRNAs in the epigenetics of cancers [40–42]. And several studies have shown that some

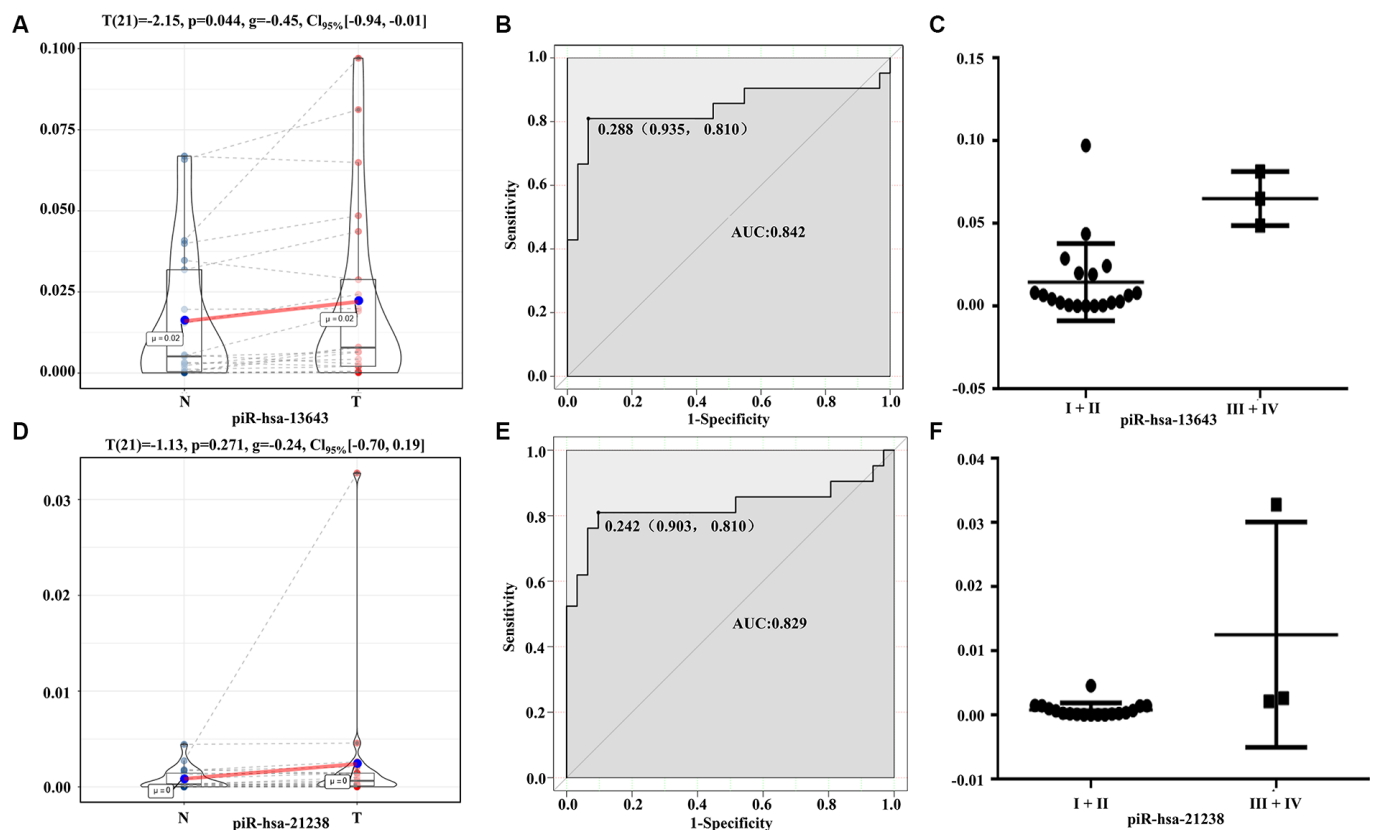

**Figure 5. Diagnostic performance of piR-13643 and piR-21238 in the validation phase of the study.** (A) The expression of piR-13643 is significantly down-regulated in tumor tissue of papillary thyroid carcinoma patients compared to normal tissue (P=0.044). (B) ROC analyses based on the expression of piR-13643 (AUC = 0.842). (C) The levels of piR-13643 increased significantly with advanced clinical stage (P = 0.0019). (D) The expression of piR-21238 is significantly upregulated in tumor tissue of papillary thyroid carcinoma patients compared to normal tissue (P = 0.271). (E) ROC analyses based on the expression of piR-21238 (AUC = 0.829). (F) The levels of piR-21238 increased significantly with advanced clinical stage (P = 0.0042). \*P < 0.05; \*\*P < 0.01; \*\*\*P < 0.001

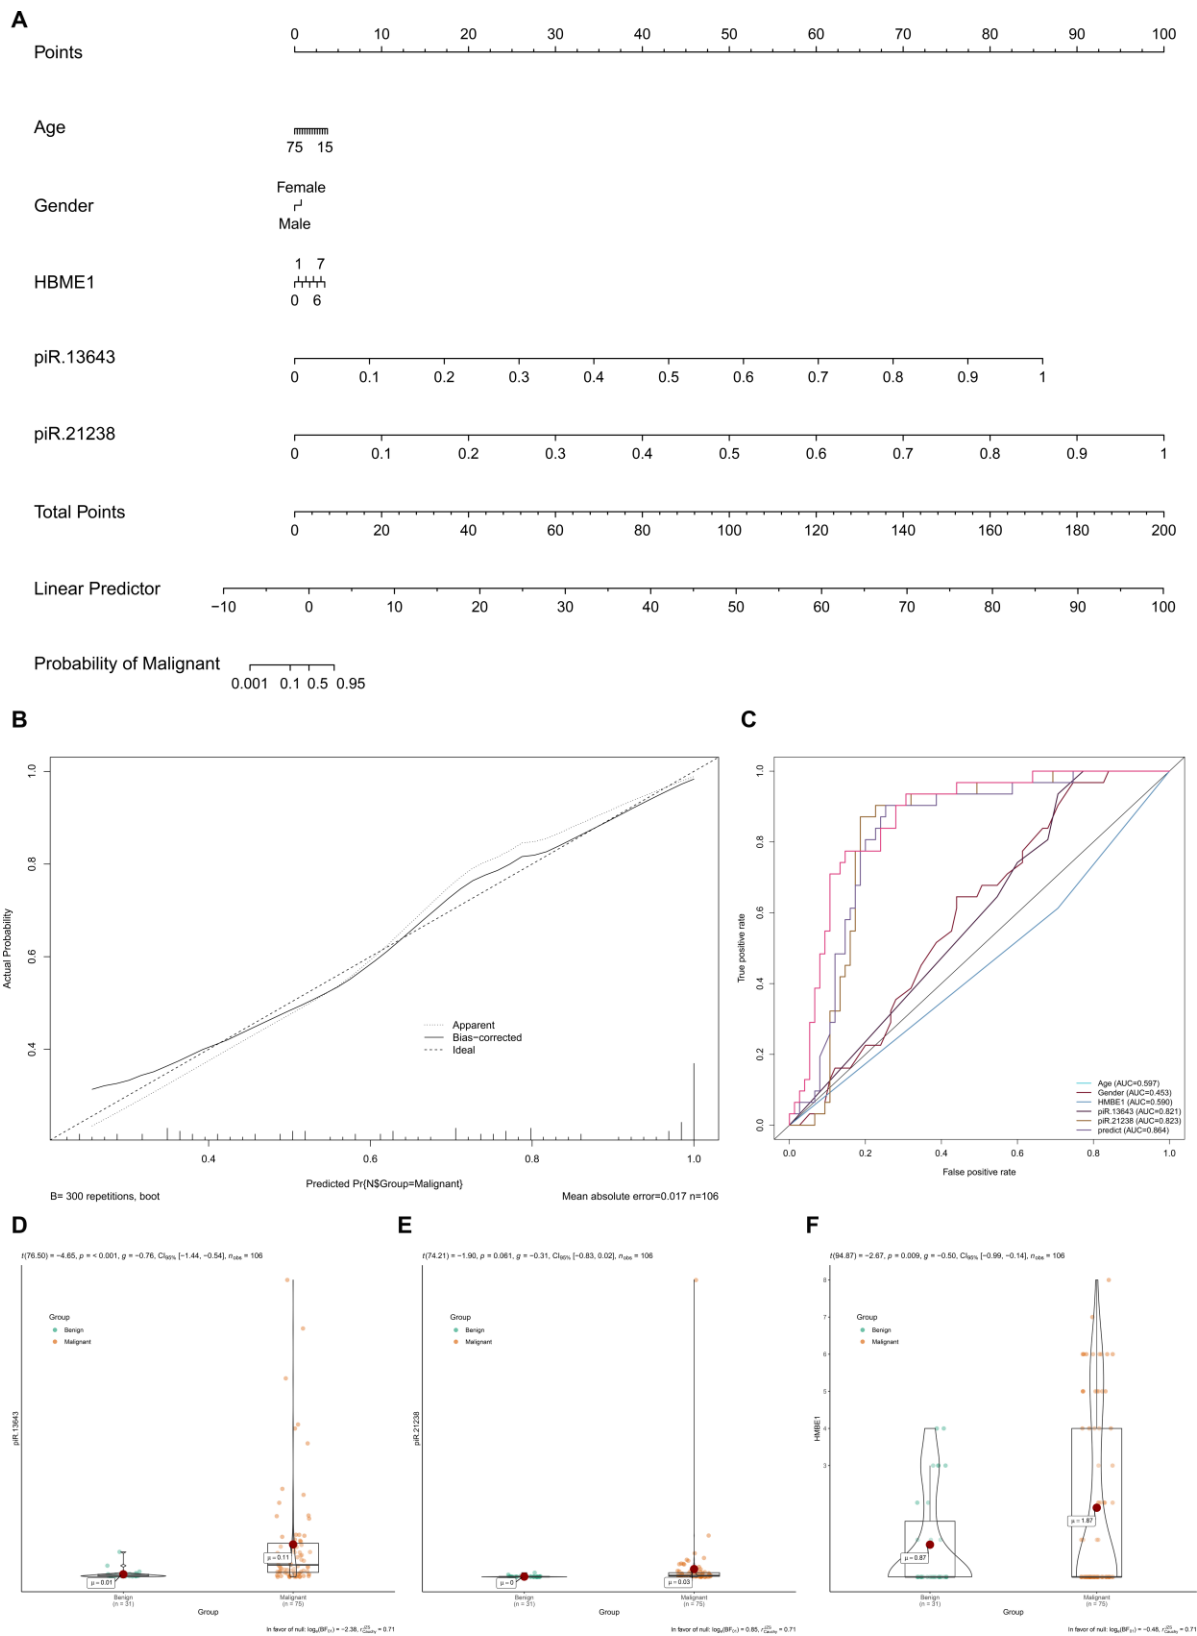

**Figure 6. The expression levels of key piRNAs were corrected by demographic data to construct a multivariate model to distinguish malignant nodules from benign. (A)** Nomogram based on multivariate model (A). The calibration curve and ROC curves suggested acceptable calibration (B) and discrimination (C) of the nomogram, respectively. Additionally, piR-13643 ( $P < 0.001$ ), piR-21238 ( $P = 0.061$ ) and HBME1 ( $P = 0.009$ ) were higher in malignant nodules compared to benign nodules in both fresh and paraffin samples (D–F).



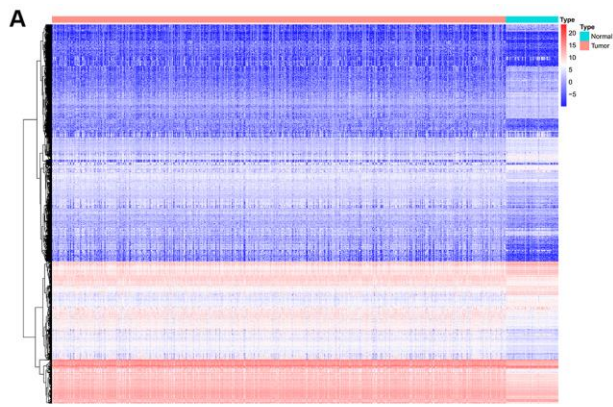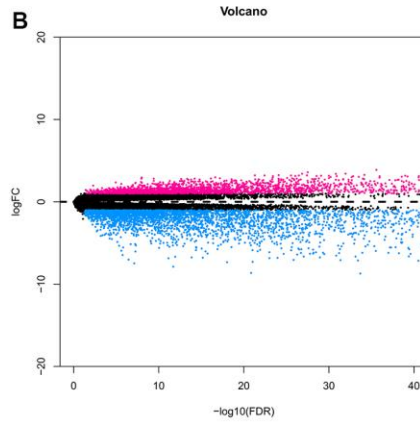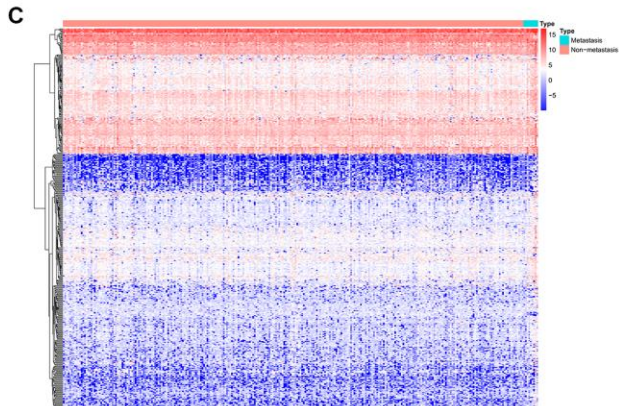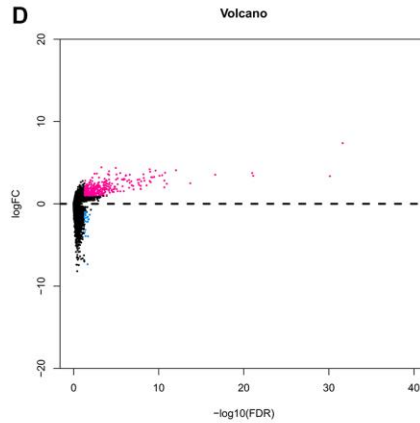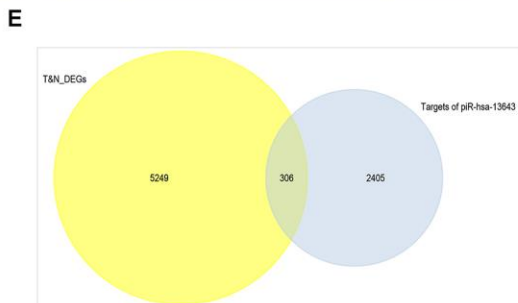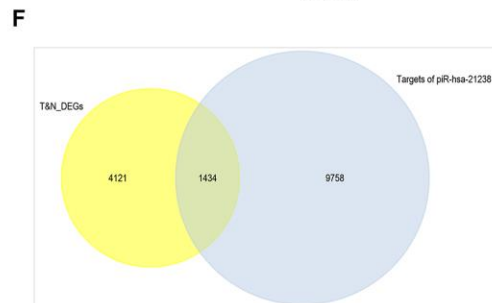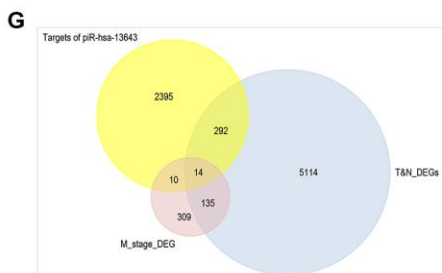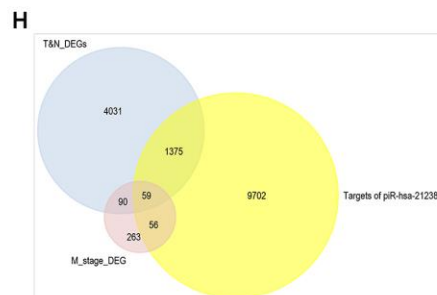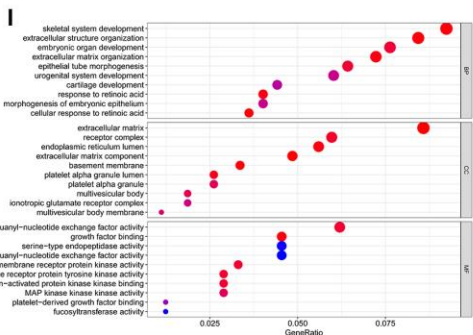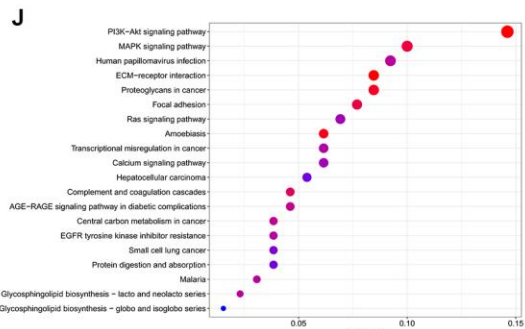

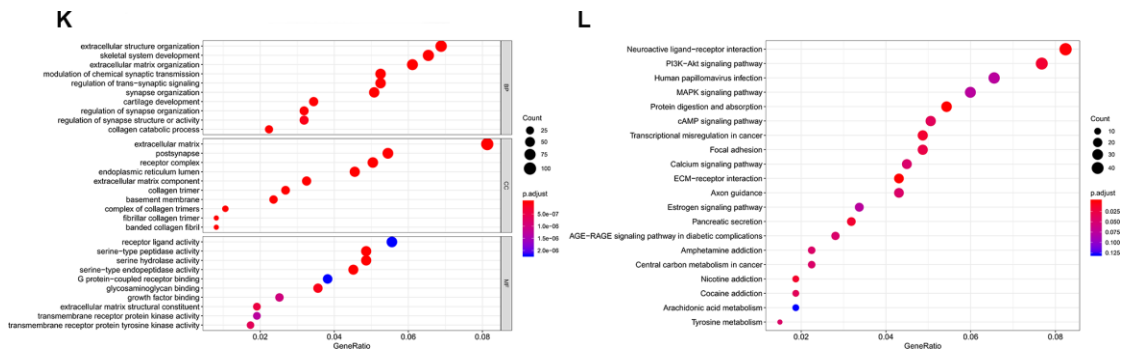

**Figure 7. Validation of target genes of piRNA-13643 and piRNA-21238.** (A) Result of hierarchical clustering for differential genes in thyroid cancer and noncancerous tissue was calculated by TCGA database. (B) Result of volcano for differential genes in thyroid cancer and noncancerous tissue was calculated by TCGA database. (C) Result of hierarchical clustering for differential genes in thyroid cancer with or without metastasis tissue was calculated by TCGA database. (D) Result of volcano for differential genes in thyroid cancer with or without metastasis tissue was calculated by TCGA database. (E) piRNA-13643 target genes prediction using differential genes in thyroid cancer and noncancerous tissue in TCGA database. (F) piRNA-21238 target genes prediction using differential genes in thyroid cancer and noncancerous tissue in TCGA database. (G) piRNA-13643 target prediction using differential genes in thyroid cancer with or without metastasis tissue in TCGA database. (H) piRNA-21238 target prediction using differential genes in thyroid cancer with or without metastasis tissue in TCGA database. (I) Gene Ontology (GO) analysis of piRNA-13643 associated with biological process, molecular function and cellular component. (J) Top twenty signal pathways of piRNA-13643 by KEGG. (K) Gene Ontology (GO) analysis of piRNA-21238 associated with biological process, molecular function and cellular component. (L) Top twenty signal pathways of piRNA-21238 by KEGG.

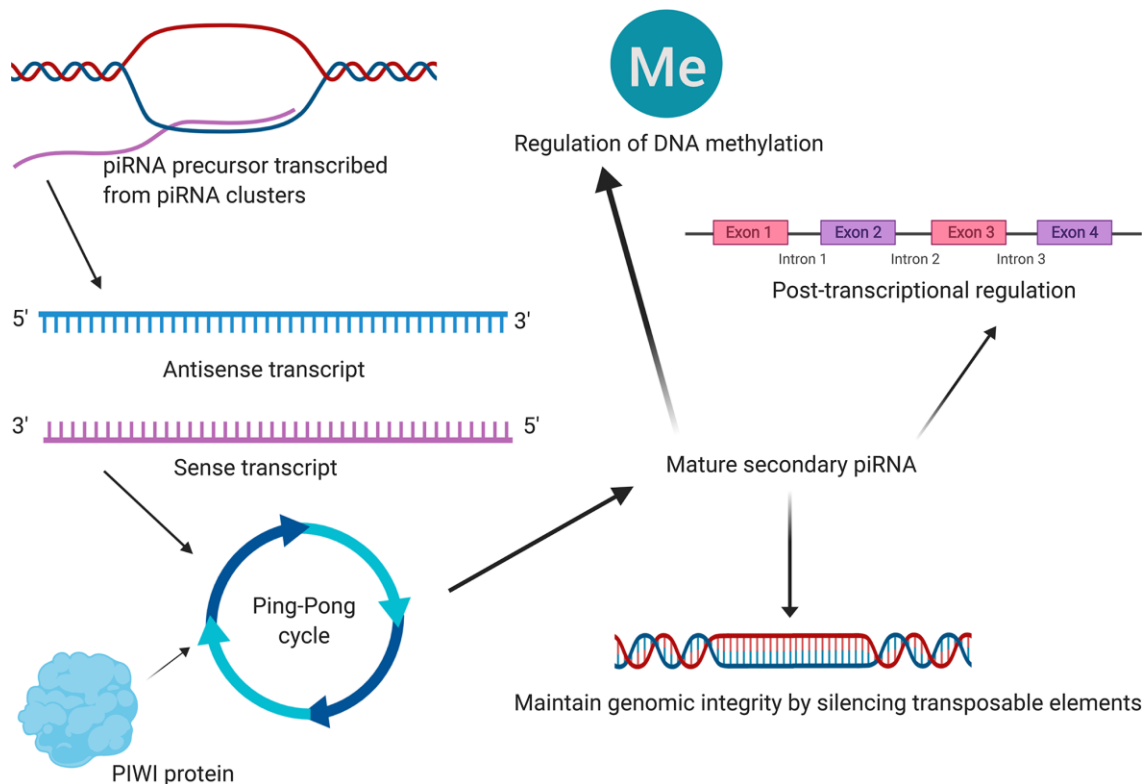

**Figure 8. The mechanism diagram (schematic diagram) of the most reported piRNA downstream mechanisms in cancer obtained from literature reviewing [17–21].** Emerging studies revealed that piRNAs were associated with the development and progression of several types of cancers, primarily through maintaining genomic integrity by silencing transposable elements, post-transcriptional regulation and regulation of DNA methylation. Although this summary might not be comprehensive, they were by far the most reported piRNA downstream mechanisms in cancer. And Figure 8 illustrates a mechanism diagram of the most reported piRNA downstream mechanisms in cancer obtained from literature reviewing.

**Table 3. Two-phase validation of upregulated piRNAs identified by real-time PCR.**

| Up-regulated piRNA         | Fold change | FDR    | AUC   |
|----------------------------|-------------|--------|-------|
| 54 paired fresh samples    |             |        |       |
| piR-hsa-13643              | 3.588852    | 0.0002 | 0.813 |
| piR-hsa-21238              | 3.537825    | 0.0004 | 0.820 |
| 21 paired paraffin samples |             |        |       |
| piR-hsa-13643              | 3.462167    | 0.0434 | 0.842 |
| piR-hsa-21238              | 5.437552    | 0.0453 | 0.829 |

Abbreviation: PIWI-interacting RNAs (piRNAs); Fold Change (FC); Area Under Curve (AUC).

piRNAs are promising diagnostic biomarkers of human malignance such as colon cancer, breast cancer and lung cancer [42–45]. Additionally, piRNAs are extremely stable and not easy to degradation by ribonucleases and may play an important role in cellular communication and other biological processes. PiRNA stability may contribute to their use as potential biomarkers for malignant diseases. Yang et al. have reported that piR-57125 can be serve as a diagnostic biomarker for colon cancer for its good diagnosis performance, resistance to repeated freeze-thaw cycle and long-term room temperature incubation [8]. Additionally, the results of this study revealed that elevated levels of HBME1 staining and BRAF<sup>V600E</sup> mutations were detected in less than 50% of PTC patients, while the abnormal upregulation of piR-13643 and piR-21238 were detected in 62% of all samples. However, we found that the highest diagnosis accuracy was achieved when a combination of all three biomarkers were used in the diagnosis of PTC. Thus, we concluded that piRNAs could serve as biomarker for the diagnosis of PTC and distinguishing benign and malignant thyroid nodules. But their involvement in carcinogenesis needs to be further established.

In terms of regulatory mechanisms, recent studies have demonstrated that piRNAs are significantly related to the tumorigenesis and progression of several types of cancers. This occurs primarily through maintaining genomic integrity (by silencing transposable elements), regulating post-transcriptional processes, and regulating DNA methylation [17–21]. PIWI proteins, including PIWIL1, PIWIL2, PIWIL3, and PIWIL4, have also been shown to play critical roles in tumorigenesis, progression, and poor prognosis [18, 46–49]. The results of the functional enrichment analysis showed that the most enriched GO terms included biological process, molecular function, and cellular component processes. KEGG signaling pathway enrichment analysis suggested that MAPK signaling pathway, PI3K-Akt signaling pathway and interferon response pathway have the most biological significance in the downstream mechanism of key piRNAs.

On one hand, it has been reported that signaling through the PI3K-Akt signaling pathway is often abnormally deregulated in human malignance. Deregulation of PI3K-Akt signaling pathway promotes cell survival/proliferation and immune infiltration. Several previous studies have demonstrated that PI3K-Akt pathway can be a target for treatment in some tumors [50, 51]. On the other hand, the MAPK signaling pathway employs a series of protein kinases that transmit signals from the cell membrane to the nucleus to control cellular processes such as proliferation, differentiation, apoptosis, migration, and invasion. MAPK hyperactivation has been implicated in many different pathologies [51]. Primarily through activation of MAPK and PI3K signaling cascades, genetic alternations have been reported to be prominently responsible for the onset, tumorigenesis, progression, and dedifferentiation in several types of cancer [52]. In the future, the relationship between these pathways and piRNAs in the PTC pathogenesis needs further research.

There are potential limitations in this study that should be addressed to construct piRNAs as novel diagnostic tools for PTC. First, the quantity of the free-circulating RNAs in PTC tissue can vary from patient to patient, biasing the results. Kits for small non-coding RNA library preparation are available that efficiently tag piRNAs of low abundance, which can solve this problem. Second, although the protocols of PTC sample collection and RT-qPCR was the same throughout the study, tested samples were stored for different lengths of time. This may have contributed to our observation of a small shift in piRNA expression. Finally, the relatively small sample size may impair the transformation and confidence of the models in other independent datasets.

To establish final cut-off values for piR-13643 and piR-21238, prospective validation of our model in multicenter studies need to be carried out. Our data underscore the enormous potential for the use of novel piRNA biomarkers in combination with other biomarkers for the early diagnosis of PTC. Although their regulation mechanisms and clinical significance need further evaluation, piRNA involvement in PTC pathogenesis is evident.

## CONCLUSIONS

Our investigations demonstrated that piR-13643 and piR-21238 are abundant and upregulated in PTC. In combination with the use of other biomarkers, detecting the upregulation of these two piRNAs improves the diagnosis rate of PTC. Although piRNAs could serve as promising diagnosis biomarkers for the accurate detection of PTC, their involvement in specific carcinogenic pathways needs to be investigated.

## MATERIALS AND METHODS

### Patient selection and data extraction

PTC tissue samples in the study were harvested from the Shanghai Tenth People's Hospital between November 2016 and August 2019. These patients were further divided into screening, training, and validation sets based on their TNM stage. Five pairs of PTC tissues were included in the screening phase, fifty-four pairs of PTC tissues were included in the training phase, and twenty-one pairs of PTC FFPE tissues were analyzed in the validation phase of this study. Information on gender, age, Union for International Cancer Control (UICC) TNM stage, and American Joint Committee on Cancer (AJCC) Cancer Staging System of each patient was collected. Patients with chronic diseases (hypertension, diabetes, coronary heart disease, etc.), other primary tumors and metastatic tumors, and patients with reliable baseline information were excluded. This study was approved by the Clinical Research Ethics Committee of Shanghai Tenth People's Hospital. Written, informed consents were obtained from all participants in the study.

### RNA extraction

Total RNA enriched for piRNA was isolated from PTC tissues using the Qiagen miRNeasy Mini Kit (catalog #217004, Qiagen, Germany) according to the protocol of the manufacturer with modifications. Briefly, 700  $\mu$ l of QIAzol lysis reagent was added to each sample and the sample was homogenized at room temperature for 5 min. Each sample received 140  $\mu$ l of chloroform and was centrifuged for 15 min at 12,000 g and 4 °C. The upper aqueous phase of each sample was transferred to a new collection tube and 525  $\mu$ l of 100% ethanol was added. The samples were centrifuged at 8,000 g for 15 s at room temperature. For each sample, 700  $\mu$ l of RWT buffer was added to the RNeasy Mini column and centrifuged 15 s at 8,000 g. Samples of 500  $\mu$ l in RPE buffer were loaded onto the RNeasy Mini column and centrifuged 15s at 8,000 g. Elution of piRNAs was performed with two 15  $\mu$ l volumes of preheated Elution Solution (total volume = 30  $\mu$ l).

Total RNA enriched for small RNAs was isolated from FFPE tissues using the Qiagen miRNeasy Mini Kit (catalog #217504, Qiagen, Germany) according to the protocol of the manufacturer with modifications. Briefly, 5-20  $\mu$ m sample sections were placed into a collection vessel containing an appropriate volume of deparaffinization solution and incubated at 56 °C for 3 min. Each sample received 150  $\mu$ l PKD Buffer and 10  $\mu$ l proteinase K and incubated at 56 °C for 15 min, then at 80 °C for 15 min. The sediment was transferred into a new 2 ml microcentrifuge tube and incubated on ice for 3 min. The samples were centrifuged for 20 min at 20,000 g. The supernatants were transferred to a new microcentrifuge tube and 10  $\mu$ l Dnase I, 320  $\mu$ l RBC buffer, and 1,120  $\mu$ l ethanol were added to the sample, and 700  $\mu$ l of the sample was transferred to a Rneasy MinElute spin column placed in a 2ml collection tube. The spin column was centrifuged for 15 s at 8,000 g. For each sample, 500  $\mu$ l of RPE buffer was added to the Rneasy MinElute spin column and centrifuged for 15 s at 8,000 g to wash the spin column membrane. PiRNAs were eluted with two 15  $\mu$ l volumes of Elution Solution. The concentration and purity of RNA were determined by measuring its optical density (A260/280 > 2.0; A260/230 > 1.8) by a NanoDrop ND-1000 Spectrophotometer (Thermo Fisher Scientific, Wilmington, DE, USA).

### Construction and sequencing of small RNA library

Ten small RNA libraries were sequenced, each containing pooled RNA from five pairs of PTC and para-cancer tissues. Total RNA was extracted using the miRNeasy Mini Kit (Cat # 217004, Qiagen) following the manufacturer's instructions. An RIN number was determined to check RNA integrity using an Agilent Bioanalyzer 2100 (Agilent Technologies, US). Equimolar amounts of each library were pooled for a final concentration of 2  $\mu$ g cDNA, and samples sequenced with 50bp single-end reads using a MiSeq sequencer (Illumina, USA). The sequencing process was controlled by the data collection software provided by Illumina for real-time data analysis (Shanghai biotechnology cooperation).

### Quantification of upregulated piRNAs by RT-qPCR

One  $\mu$ g of total RNA was reverse-transcribed into cDNA by a Bulge-Loop piRNA-specific RT primer and reverse transcriptase (Ribobio, Guangzhou, Guangdong, China). Reaction mixtures were incubated for 60 min at 42 °C, 10 min at 70 °C and then held at 4 °C. From the resulting reaction, 2  $\mu$ l was used for quantitative PCR analysis performed on an ABI PRISM 7900 Sequence Detection System (Applied Biosystems, USA) using the miScript SYBR

Green PCR Kit and Bulge-Loop primer (Ribobio, Guangzhou, Guangdong, China). A previously published method was used for piRNA detection [53, 54]. For the quantitative PCR analysis, 10  $\mu$ l of 2x QuantiTect SYBR Green PCR Master Mix, 2  $\mu$ l of the RT product, 0.8  $\mu$ l of 5  $\mu$ M Bulge-Loop piRNA forward primer, and 0.8  $\mu$ l of 5  $\mu$ M Bulge-Loop piRNA reverse primer were added to each reaction. The volume was adjusted with RNA-free H<sub>2</sub>O. The reaction was incubated at 95 °C for 10 min, followed by 40 cycles at 95 °C for 2 s, 60 °C for 20 s, and 70 °C for 10 s. All reactions were performed in triplicate. U6 was selected as a reference gene according to a previous study [53, 54]. PiRNA expression was normalized to the mean of the reference gene. The relative expression levels of piRNAs were determined using the  $2^{-\Delta\Delta Ct}$  method.

### **Immunohistochemistry and BRAF<sup>V600E</sup> mutation detection**

FFPE tissue blocks of 4  $\mu$ m were deparaffinized and dehydrated. Following routine rehydration, antigen retrieval, and blocking procedures, the sections were incubated overnight with 1:25 dilution of HBME1 antibody (ab2383; Abcam, Cambridge, UK) at 4 °C. The slides were incubated with HRP polymer for 30 min and with hematoxylin as a counterstain for 5 min at room temperature. The sections were analyzed and positive results were recorded for stained cancer cells. The scoring scale used for stained tumor cells was as follows: negative (0), yellowish (1-4), light brown (5-8), and dark brown (9-12). A positive control of PTC was used in each run with the primary antibody being replaced by buffer in the negative controls. HBME1 staining was found in both the cytoplasm and membranous tissue.

Total DNA was isolated from FFPE PTC tissues using the QIAamp DNA FFPE Tissue Kit (catalog #56404, Qiagen, Germany) in strict accordance with the manufacturer's instructions (AmoyDx BRAFV600E Mutation Detection Kit, Amoy Diagnostics, China, ADx-ARMS). The reaction mixture and positive control from the kit was thawed at room temperature, vortexed for 15 seconds, then centrifuged for 15 seconds. For each sample, 0.4  $\mu$ l Taq enzyme was added and mixed by vortexing. All samples were centrifuged for 15 seconds and 45  $\mu$ l of the samples was dispensed into PCR tubes. For each sample, 5  $\mu$ l of ultrapure water was added and the PCR reaction tube was covered. The reaction parameters were: incubation at 95 °C for 5 min, 15 cycles at 95 °C for 25 s, 64 °C for 20 s, 72 °C for 20 s, 31 cycles of 93 °C for 25 s, 60 °C for 35 s, then 72 °C for 20 s. FAM and HEX (or VIC) signals were collected during the third phase at 60 °C.

### **Identification of key piRNAs potential downstream mechanisms**

The RNAhybrid algorithm was used to predict the potential target genes of key piRNAs ( $P < 0.01$ , binding free energy  $< 25$  kcal). To reveal the potential regulatory mechanism of piRNA, the intersections between the target genes of key piRNAs and DEGs from PTC and normal solid tissues in the TCGA-THCA database [ $\log$  Fold Change (FC)  $> 1$ , False Discovery Rate (FDR)  $< 0.05$ ] were used to perform functional enrichment analysis.

### **Statistical analysis**

The CLC genomics workbench 6.0 software was used to map high-quality sequences to the piRNA database with no base mismatch allowed in the alignment process. The fragments of piRNAs were counted followed by Transcripts Per Million normalization. Significant differentially expressed piRNAs were identified as those with FDR values above the threshold ( $Q < 0.01$ ) and under the criteria of  $\log_2FC > 2$ . The expression levels of all significantly upregulated piRNAs were validated in all PTC and thyroid nodule samples by RT-qPCR. Paired t-tests and non-parametric tests were utilized to evaluate the relationship between all upregulated piRNAs and AJCC stage. Only piRNAs which were significantly differentially expressed and significantly associated with AJCC stage were included in further biomarker analysis. The expression levels of key piRNAs were corrected by demographic data to construct a multivariate model to distinguish malignant from benign nodules. The nomogram predicting the malignancy of PTC was generated based on the multivariate Cox regression model. The sum of values for the expression levels of key piRNAs, the extent of HBME1 staining, and associated demographic data, provided the probability of PTC. The calibration plot and the ROC curve were used to estimate the calibration and discrimination of the nomogram, respectively.

Only two-sided  $P$  value  $< 0.05$  was considered as statistically significant. All of the statistical analyses were performed with R version 3.6.1 software (Institute for Statistics and Mathematics, Vienna, Austria; <https://www.r-project.org>).

### **Ethical approval**

This study was approved by the Clinical Research Ethics Committee of Shanghai Tenth People's Hospital and written informed consents were obtained from all participants for conducting the experiments.

## Abbreviations

miRNAs: microRNAs; piRNAs: PIWI-interacting RNAs; NGS: next generation sequencing; RT-qPCR: Reverse Transcription Quantitative Polymerase Chain Reaction; UICC: Union for International Cancer Control; AJCC: American Joint Committee on Cancer; DEGs: differentially expressed genes; TCGA: The Cancer Genome Atlas; FC: Fold Change; FDR: False Discovery Rate; TPM: Transcripts per million; ROC: receiver operating characteristic curves; AUC: Area Under Curve; GO: Gene Ontology; KEGG: Kyoto Encyclopedia of Genes and Genomes.

## AUTHOR CONTRIBUTIONS

Conception/design: Zhengyan Chang, Guo Ji, Runzhi Huang, Hong Chen, Yaohui Gao, Weifeng Wang, Xuechen Sun, Jie Zhang, Jiayi Zheng, Qing Wei. Collection and/or assembly of data: Zhengyan Chang, Guo Ji, Runzhi Huang, Hong Chen, Yaohui Gao, Weifeng Wang, Xuechen Sun, Jie Zhang, Jiayi Zheng, Qing Wei. Data analysis and interpretation: Zhengyan Chang, Guo Ji, Runzhi Huang, Hong Chen, Yaohui Gao, Weifeng Wang, Xuechen Sun, Jie Zhang, Jiayi Zheng, Qing Wei. Manuscript writing: Zhengyan Chang, Guo Ji, Runzhi Huang, Hong Chen, Yaohui Gao, Weifeng Wang, Xuechen Sun, Jie Zhang, Jiayi Zheng, Qing Wei. Final approval of manuscript: Zhengyan Chang, Guo Ji, Runzhi Huang, Hong Chen, Yaohui Gao, Weifeng Wang, Xuechen Sun, Jie Zhang, Jiayi Zheng, Qing Wei.

## ACKNOWLEDGMENTS

We thank the The Cancer Genome Atlas (TCGA) team for using their data.

## CONFLICTS OF INTEREST

The authors declare that the research was conducted in the absence of any commercial or financial relationships that could be construed as a potential conflicts of interest.

## FUNDING

This study was supported in part by the National Natural Science Foundation of China (Grant No. 81772849) and Shanghai Municipal Health Commission (Grant No. 201940306).

## REFERENCES

1. Siegel RL, Miller KD, Jemal A. Cancer statistics, 2017. *CA Cancer J Clin.* 2017; 67:7–30.

<https://doi.org/10.3322/caac.21387>

PMID:[28055103](https://pubmed.ncbi.nlm.nih.gov/28055103/)

2. Haugen BR, Alexander EK, Bible KC, Doherty GM, Mandel SJ, Nikiforov YE, Pacini F, Randolph GW, Sawka AM, Schlumberger M, Schuff KG, Sherman SI, Sosa JA, et al. 2015 american thyroid association management guidelines for adult patients with thyroid nodules and differentiated thyroid cancer: the american thyroid association guidelines task force on thyroid nodules and differentiated thyroid cancer. *Thyroid.* 2016; 26:1–133.  
<https://doi.org/10.1089/thy.2015.0020>  
PMID:[26462967](https://pubmed.ncbi.nlm.nih.gov/26462967/)
3. Landa I, Ibrahimasic T, Boucai L, Sinha R, Knauf JA, Shah RH, Dogan S, Ricarte-Filho JC, Krishnamoorthy GP, Xu B, Schultz N, Berger MF, Sander C, et al. Genomic and transcriptomic hallmarks of poorly differentiated and anaplastic thyroid cancers. *J Clin Invest.* 2016; 126:1052–66.  
<https://doi.org/10.1172/JCI85271>  
PMID:[26878173](https://pubmed.ncbi.nlm.nih.gov/26878173/)
4. Uppara M, Adaba F, Askari A, Clark S, Hanna G, Athanasiou T, Faiz O. A systematic review and meta-analysis of the diagnostic accuracy of pyruvate kinase M2 isoenzymatic assay in diagnosing colorectal cancer. *World J Surg Oncol.* 2015; 13:48.  
<https://doi.org/10.1186/s12957-015-0446-4>  
PMID:[25888768](https://pubmed.ncbi.nlm.nih.gov/25888768/)
5. Di Lena M, Travaglio E, Altomare DF. New strategies for colorectal cancer screening. *World J Gastroenterol.* 2013; 19:1855–60.  
<https://doi.org/10.3748/wjg.v19.i12.1855>  
PMID:[23569331](https://pubmed.ncbi.nlm.nih.gov/23569331/)
6. Iliiev R, Fedorko M, Machackova T, Mlcochova H, Svoboda M, Pacik D, Dolezel J, Stanik M, Slaby O. Expression levels of PIWI-interacting RNA, piR-823, are deregulated in tumor tissue, blood serum and urine of patients with renal cell carcinoma. *Anticancer Res.* 2016; 36:6419–23.  
<https://doi.org/10.21873/anticancerres.11239>  
PMID:[27919963](https://pubmed.ncbi.nlm.nih.gov/27919963/)
7. Huang R, Meng T, Chen R, Yan P, Zhang J, Hu P, Zhu X, Yin H, Song D, Huang Z. The construction and analysis of tumor-infiltrating immune cell and ceRNA networks in recurrent soft tissue sarcoma. *Aging (Albany NY).* 2019; 11:10116–43.  
<https://doi.org/10.18632/aging.102424>  
PMID:[31739284](https://pubmed.ncbi.nlm.nih.gov/31739284/)
8. Yang X, Cheng Y, Lu Q, Wei J, Yang H, Gu M. Detection of stably expressed piRNAs in human blood. *Int J Clin Exp Med.* 2015; 8:13353–58.  
PMID:[26550265](https://pubmed.ncbi.nlm.nih.gov/26550265/)

9. Sarkar A, Volff JN, Vaury C. piRNAs and their diverse roles: a transposable element-driven tactic for gene regulation? *FASEB J*. 2017; 31:436–46.  
<https://doi.org/10.1096/fj.201600637RR>  
PMID:27799346
10. Aravin AA, Sachidanandam R, Bourc'his D, Schaefer C, Pezic D, Toth KF, Bestor T, Hannon GJ. A piRNA pathway primed by individual transposons is linked to de novo DNA methylation in mice. *Mol Cell*. 2008; 31:785–99.  
<https://doi.org/10.1016/j.molcel.2008.09.003>  
PMID:18922463
11. Kuramochi-Miyagawa S, Watanabe T, Gotoh K, Totoki Y, Toyoda A, Ikawa M, Asada N, Kojima K, Yamaguchi Y, Ijiri TW, Hata K, Li E, Matsuda Y, et al. DNA methylation of retrotransposon genes is regulated by piwi family members MILI and MIWI2 in murine fetal testes. *Genes Dev*. 2008; 22:908–17.  
<https://doi.org/10.1101/gad.1640708> PMID:18381894
12. Aravin AA, Bourc'his D. Small RNA guides for de novo DNA methylation in mammalian germ cells. *Genes Dev*. 2008; 22:970–75.  
<https://doi.org/10.1101/gad.1669408>  
PMID:18413711
13. Cheng J, Deng H, Xiao B, Zhou H, Zhou F, Shen Z, Guo J. piR-823, a novel non-coding small RNA, demonstrates in vitro and in vivo tumor suppressive activity in human gastric cancer cells. *Cancer Lett*. 2012; 315:12–17.  
<https://doi.org/10.1016/j.canlet.2011.10.004>  
PMID:22047710
14. Cui L, Lou Y, Zhang X, Zhou H, Deng H, Song H, Yu X, Xiao B, Wang W, Guo J. Detection of circulating tumor cells in peripheral blood from patients with gastric cancer using piRNAs as markers. *Clin Biochem*. 2011; 44:1050–57.  
<https://doi.org/10.1016/j.clinbiochem.2011.06.004>  
PMID:21704610
15. Cheng J, Guo JM, Xiao BX, Miao Y, Jiang Z, Zhou H, Li QN. piRNA, the new non-coding RNA, is aberrantly expressed in human cancer cells. *Clin Chim Acta*. 2011; 412:1621–25.  
<https://doi.org/10.1016/j.cca.2011.05.015>  
PMID:21616063
16. Watanabe T, Cheng EC, Zhong M, Lin H. Retrotransposons and pseudogenes regulate mRNAs and lncRNAs via the piRNA pathway in the germline. *Genome Res*. 2015; 25:368–80.  
<https://doi.org/10.1101/gr.180802.114>  
PMID:25480952
17. Huang XA, Yin H, Sweeney S, Raha D, Snyder M, Lin H. A major epigenetic programming mechanism guided by piRNAs. *Dev Cell*. 2013; 24:502–16.  
<https://doi.org/10.1016/j.devcel.2013.01.023>  
PMID:23434410
18. Weng W, Li H, Goel A. Piwi-interacting RNAs (piRNAs) and cancer: emerging biological concepts and potential clinical implications. *Biochim Biophys Acta Rev Cancer*. 2019; 1871:160–69.  
<https://doi.org/10.1016/j.bbcan.2018.12.005>  
PMID:30599187
19. Andersen PR, Tirian L, Vunjak M, Brennecke J. A heterochromatin-dependent transcription machinery drives piRNA expression. *Nature*. 2017; 549:54–59.  
<https://doi.org/10.1038/nature23482>  
PMID:28847004
20. Watanabe T, Lin H. Posttranscriptional regulation of gene expression by piwi proteins and piRNAs. *Mol Cell*. 2014; 56:18–27.  
<https://doi.org/10.1016/j.molcel.2014.09.012>  
PMID:25280102
21. Zhang D, Tu S, Stubna M, Wu WS, Huang WC, Weng Z, Lee HC. The piRNA targeting rules and the resistance to piRNA silencing in endogenous genes. *Science*. 2018; 359:587–92.  
<https://doi.org/10.1126/science.aao2840>  
PMID:29420292
22. Banerjee M, Reyes-Gastelum D, Haymart MR. Treatment-free survival in patients with differentiated thyroid cancer. *J Clin Endocrinol Metab*. 2018; 103:2720–27.  
<https://doi.org/10.1210/jc.2018-00511>  
PMID:29788217
23. Jemal A, Ward EM, Johnson CJ, Cronin KA, Ma J, Ryerson B, Mariotto A, Lake AJ, Wilson R, Sherman RL, Anderson RN, Henley SJ, Kohler BA, et al. Annual report to the nation on the status of cancer, 1975–2014, featuring survival. *J Natl Cancer Inst*. 2017; 109:djx030.  
<https://doi.org/10.1093/jnci/djx030>  
PMID:28376154
24. Lim H, Devesa SS, Sosa JA, Check D, Kitahara CM. Trends in thyroid cancer incidence and mortality in the United States, 1974–2013. *JAMA*. 2017; 317:1338–48.  
<https://doi.org/10.1001/jama.2017.2719>  
PMID:28362912
25. Schneider DF, Chen H. New developments in the diagnosis and treatment of thyroid cancer. *CA Cancer J Clin*. 2013; 63:374–94.  
<https://doi.org/10.3322/caac.21195>  
PMID:23797834
26. Cabanillas ME, McFadden DG, Durante C. Thyroid cancer. *Lancet*. 2016; 388:2783–95.  
[https://doi.org/10.1016/S0140-6736\(16\)30172-6](https://doi.org/10.1016/S0140-6736(16)30172-6)  
PMID:27240885

27. Welch HG, Doherty GM. Saving thyroids - overtreatment of small papillary cancers. *N Engl J Med*. 2018; 379:310–12.  
<https://doi.org/10.1056/NEJMp1804426>  
PMID:30044933
28. McLeod DS, Sawka AM, Cooper DS. Controversies in primary treatment of low-risk papillary thyroid cancer. *Lancet*. 2013; 381:1046–57.  
[https://doi.org/10.1016/S0140-6736\(12\)62205-3](https://doi.org/10.1016/S0140-6736(12)62205-3)  
PMID:23668555
29. Fagin JA, Wells SA Jr. Biologic and clinical perspectives on thyroid cancer. *N Engl J Med*. 2016; 375:1054–67.  
<https://doi.org/10.1056/NEJMr1501993>  
PMID:27626519
30. Bhatia P, Deniwar A, Friedlander P, Aslam R, Kandil E. Diagnostic potential of ancillary molecular testing in differentiation of benign and Malignant thyroid nodules. *Anticancer Res*. 2015; 35:1237–41.  
PMID:25750270
31. Bartolazzi A, Orlandi F, Saggiorato E, Volante M, Arecco F, Rossetto R, Palestini N, Ghigo E, Papotti M, Bussolati G, Martegani MP, Pantellini F, Carpi A, et al, and Italian Thyroid Cancer Study Group (ITCSG). Galectin-3-expression analysis in the surgical selection of follicular thyroid nodules with indeterminate fine-needle aspiration cytology: a prospective multicentre study. *Lancet Oncol*. 2008; 9:543–49.  
[https://doi.org/10.1016/S1470-2045\(08\)70132-3](https://doi.org/10.1016/S1470-2045(08)70132-3)  
PMID:18495537
32. Chiu CG, Strugnell SS, Griffith OL, Jones SJ, Gown AM, Walker B, Nabi IR, Wiseman SM. Diagnostic utility of galectin-3 in thyroid cancer. *Am J Pathol*. 2010; 176:2067–81.  
<https://doi.org/10.2353/ajpath.2010.090353>  
PMID:20363921
33. Cancer Genome Atlas Research Network. Integrated genomic characterization of papillary thyroid carcinoma. *Cell*. 2014; 159:676–90.  
<https://doi.org/10.1016/j.cell.2014.09.050>  
PMID:25417114
34. Shobab L, Gomes-Lima C, Zeymo A, Feldman R, Jonklaas J, Wartofsky L, Burman KD. Clinical, pathological, and molecular profiling of radioactive iodine refractory differentiated thyroid cancer. *Thyroid*. 2019; 29:1262–68.  
<https://doi.org/10.1089/thy.2019.0075>  
PMID:31319763
35. Liu J, Liu R, Shen X, Zhu G, Li B, Xing M. The genetic duet of BRAF V600E and TERT promoter mutations robustly predicts loss of radioiodine avidity in recurrent papillary thyroid cancer. *J Nucl Med*. 2020; 61:177–82.  
<https://doi.org/10.2967/jnumed.119.227652>  
PMID:31375570
36. Huang M, Yan C, Xiao J, Wang T, Ling R. Relevance and clinicopathologic relationship of BRAF V600E, TERT and NRAS mutations for papillary thyroid carcinoma patients in northwest China. *Diagn Pathol*. 2019; 14:74.  
<https://doi.org/10.1186/s13000-019-0849-6>  
PMID:31300059
37. Xing M, Haugen BR, Schlumberger M. Progress in molecular-based management of differentiated thyroid cancer. *Lancet*. 2013; 381:1058–69.  
[https://doi.org/10.1016/S0140-6736\(13\)60109-9](https://doi.org/10.1016/S0140-6736(13)60109-9)  
PMID:23668556
38. Paskaš S, Janković J, Živaljević V, Tatić S, Božić V, Nikolić A, Radojković D, Savin S, Cvejić D. Malignant risk stratification of thyroid FNA specimens with indeterminate cytology based on molecular testing. *Cancer Cytopathol*. 2015; 123:471–79.  
<https://doi.org/10.1002/cncy.21554>  
PMID:25924719
39. Kondo T, Ezzat S, Asa SL. Pathogenetic mechanisms in thyroid follicular-cell neoplasia. *Nat Rev Cancer*. 2006; 6:292–306.  
<https://doi.org/10.1038/nrc1836>  
PMID:16557281
40. Siddiqi S, Matushansky I. Piwis and piwi-interacting RNAs in the epigenetics of cancer. *J Cell Biochem*. 2012; 113:373–80.  
<https://doi.org/10.1002/jcb.23363>  
PMID:21928326
41. Ng KW, Anderson C, Marshall EA, Minatel BC, Enfield KS, Saprunoff HL, Lam WL, Martinez VD. Piwi-interacting RNAs in cancer: emerging functions and clinical utility. *Mol Cancer*. 2016; 15:5.  
<https://doi.org/10.1186/s12943-016-0491-9>  
PMID:26768585
42. Vychytilova-Faltejskova P, Stitkovcova K, Radova L, Sachlova M, Kosarova Z, Slaba K, Kala Z, Svoboda M, Kiss I, Vyzula R, Cho WC, Slaby O. Circulating PIWI-interacting RNAs piR-5937 and piR-28876 are promising diagnostic biomarkers of colon cancer. *Cancer Epidemiol Biomarkers Prev*. 2018; 27:1019–28.  
<https://doi.org/10.1158/1055-9965.EPI-18-0318>  
PMID:29976566
43. Wang Z, Yang H, Ma D, Mu Y, Tan X, Hao Q, Feng L, Liang J, Xin W, Chen Y, Wu Y, Jia Y, Zhao H. Serum PIWI-interacting RNAs piR-020619 and piR-020450 are promising novel biomarkers for early detection of colorectal cancer. *Cancer Epidemiol Biomarkers Prev*. 2020; 29:990–98.  
<https://doi.org/10.1158/1055-9965.EPI-19-1148>  
PMID:32066615



44. Maleki Dana P, Mansournia MA, Mirhashemi SM. PIWI-interacting RNAs: new biomarkers for diagnosis and treatment of breast cancer. *Cell Biosci.* 2020; 10:44. <https://doi.org/10.1186/s13578-020-00403-5> PMID:32211149
45. Fathizadeh H, Asemi Z. Epigenetic roles of PIWI proteins and piRNAs in lung cancer. *Cell Biosci.* 2019; 9:102. <https://doi.org/10.1186/s13578-019-0368-x> PMID:31890151
46. Sasaki T, Shiohama A, Minoshima S, Shimizu N. Identification of eight members of the argonaute family in the human genome. *Genomics.* 2003; 82:323–30. [https://doi.org/10.1016/s0888-7543\(03\)00129-0](https://doi.org/10.1016/s0888-7543(03)00129-0) PMID:12906857
47. Taubert H, Greither T, Kaushal D, Würfl P, Bache M, Bartel F, Kehlen A, Lautenschläger C, Harris L, Kraemer K, Meye A, Kappler M, Schmidt H, et al. Expression of the stem cell self-renewal gene hiwi and risk of tumour-related death in patients with soft-tissue sarcoma. *Oncogene.* 2007; 26:1098–100. <https://doi.org/10.1038/sj.onc.1209880> PMID:16953229
48. Su C, Ren ZJ, Wang F, Liu M, Li X, Tang H. PIWIL4 regulates cervical cancer cell line growth and is involved in down-regulating the expression of p14ARF and p53. *FEBS Lett.* 2012; 586:1356–62. <https://doi.org/10.1016/j.febslet.2012.03.053> PMID:22483988
49. Wang Y, Jiang Y, Ma N, Sang B, Hu X, Cong X, Liu Z. Overexpression of hiwi inhibits the growth and migration of chronic myeloid leukemia cells. *Cell Biochem Biophys.* 2015; 73:117–24. <https://doi.org/10.1007/s12013-015-0651-3> PMID:25701408
50. López-Knowles E, O’Toole SA, McNeil CM, Millar EK, Qiu MR, Crea P, Daly RJ, Musgrove EA, Sutherland RL. PI3K pathway activation in breast cancer is associated with the basal-like phenotype and cancer-specific mortality. *Int J Cancer.* 2010; 126:1121–31. <https://doi.org/10.1002/ijc.24831> PMID:19685490
51. Krishna M, Narang H. The complexity of mitogen-activated protein kinases (MAPKs) made simple. *Cell Mol Life Sci.* 2008; 65:3525–44. <https://doi.org/10.1007/s00018-008-8170-7> PMID:18668205
52. Ramírez-Moya J, Santisteban P. miRNA-directed regulation of the main signaling pathways in thyroid cancer. *Front Endocrinol (Lausanne).* 2019; 10:430. <https://doi.org/10.3389/fendo.2019.00430> PMID:31312183
53. Ye W, Liu X, Guo J, Sun X, Sun Y, Shen B, Zhou D, Zhu C. piRNA-3878 targets P450 (CpCYP307B1) to regulate pyrethroid resistance in *Culex pipiens pallens*. *Parasitol Res.* 2017; 116:2489–97. <https://doi.org/10.1007/s00436-017-5554-3> PMID:28698948
54. Qu A, Wang W, Yang Y, Zhang X, Dong Y, Zheng G, Wu Q, Zou M, Du L, Wang Y, Wang C. A serum piRNA signature as promising non-invasive diagnostic and prognostic biomarkers for colorectal cancer. *Cancer Manag Res.* 2019; 11:3703–20. <https://doi.org/10.2147/CMAR.S193266> PMID:31118791

## SUPPLEMENTARY MATERIALS

### Supplementary Figures

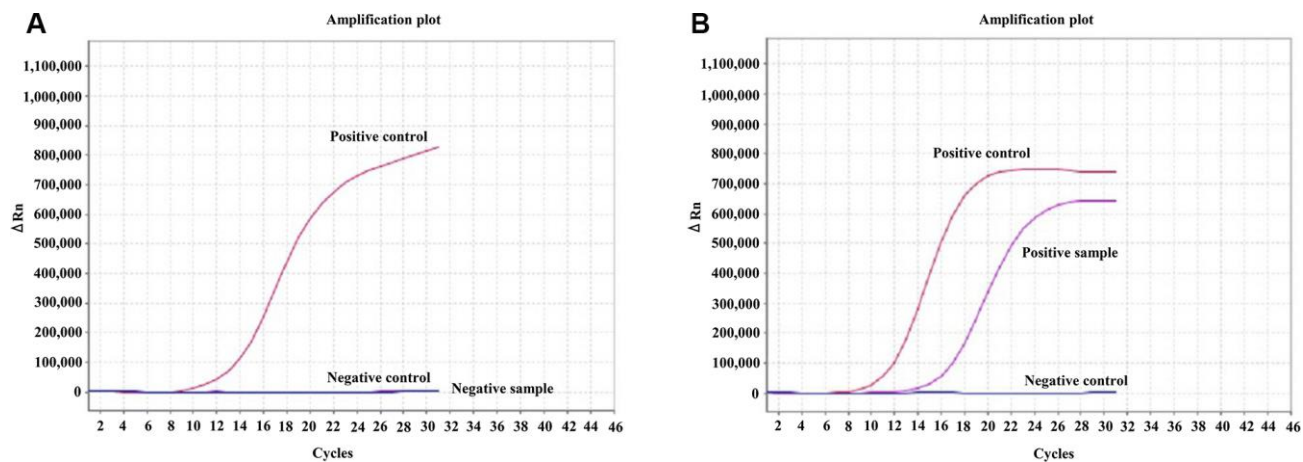

**Supplementary Figure 1. Identification of BRAF mutations.** (A) Sample curve with the wild-type BRAF gene. (B) Sample curve with the mutant BRAF gene.

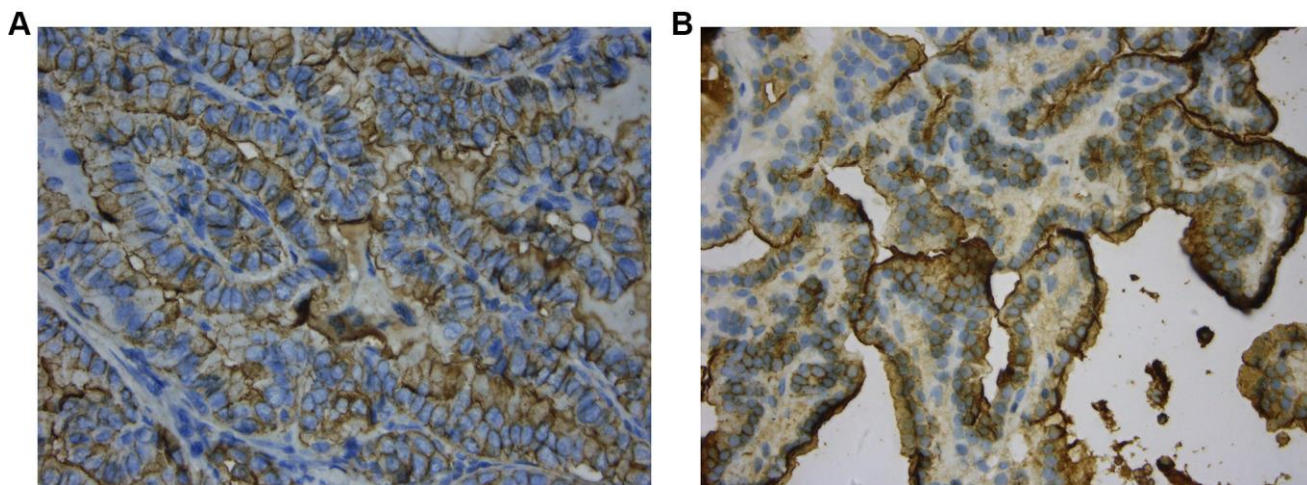

**Supplementary Figure 2.** In some patients, we also found some ambiguous staining of HBME1, which were concentrated in the benign nodules and non-staining in the malignant nodules (A) Diffusely positive HBME-1 cytoplasmic with membranous staining and luminal accentuation is shown in a patient with papillary thyroid carcinoma (X100). (B) Diffusely positive HBME-1 cytoplasmic with membranous staining and luminal accentuation is shown in thyroid nodule tissues (X100).

## Supplementary Materials

Please browse Full Text version to see the data of Supplementary Materials 1 to 2.

**Supplementary Material 1. Gene expression profile of 5 thyroid cancer samples by small RNA sequencing (Raw count).**

**Supplementary Material 2. The binding sites of piR-13643 and piR-21238 to the target genes.**
