# Supplementary material for: PIWI-interacting RNAs piR-13643 and piR-21238 are promising diagnostic biomarkers of papillary thyroid carcinoma
Source: Aging (Albany NY). 2020 May 19;12(10):9292–310. doi: 10.18632/aging.103206 (PMC7288952; doi:10.18632/aging.103206)
Supplement: Supplementary Material 2 [file aging-12-103206-s004..xlsx]

## Sheet: result_piR-13643
target: TRBV20-1
length: 413
miRNA : piR-hsa-13643
length: 27
mfe: -31.2 kcal/mol
p-value: 0.036943
position 89
target 5' U GC CUGGG G C UUGG U 3'
UCU UGCUU GCCA G UCCGGGC UGC
GGA ACGAA UGGU C AGGUCUG ACG
miRNA 3' G UA U 5'
target: TRBV3-1
length: 391
miRNA : piR-hsa-13643
length: 27
mfe: -31.4 kcal/mol
p-value: 0.031516
position 15
target 5' C GG C UG GCCUCACUCUGCCAU G 3'
CCU G CUUGCC GUCU GGGC UGCA
GGA C GAAUGG CAGG UCUG ACGU
miRNA 3' A UG UA 5'
target: TRBV20OR9-2
length: 416
miRNA : piR-hsa-13643
length: 27
mfe: -31.2 kcal/mol
p-value: 0.037356
position 94
target 5' U GC CUGGG G C UUAG U 3'
UCU UGCUU GCCA G UCCGGGC UGC
GGA ACGAA UGGU C AGGUCUG ACG
miRNA 3' G UA U 5'
target: TRBV6-4
length: 365
miRNA : piR-hsa-13643
length: 27
mfe: -32.3 kcal/mol
p-value: 0.018534
position 35
target 5' U G GUGUG UUUUCUCUCCUGUGG AG UG U 3'
CCU UGCU GCC GC GUCCAG AUUGC
GGA ACGA UGG UG CAGGUC UAACG
miRNA 3' A UG U 5'
target: TRAV1-1
length: 392
miRNA : piR-hsa-13643
length: 27
mfe: -30.4 kcal/mol
p-value: 0.049272
position 150
target 5' A GUGGAAGGA U AAC C 3'
GCU GCCA UGUCCAGAUA UGCA
CGA UGGU GCAGGUCUGU ACGU
miRNA 3' GGAA A A 5'
target: TRAV1-2
length: 402
miRNA : piR-hsa-13643
length: 27
mfe: -30.6 kcal/mol
p-value: 0.046693
position 168
target 5' A ACGGAAGG U CAAC C 3'
GCU UGCCA UGUCCAGAU UGCA
CGA AUGGU GCAGGUCUG ACGU
miRNA 3' GGAA UA 5'
target: TRBV20-1
length: 413
miRNA : piR-hsa-13643
length: 27
mfe: -31.2 kcal/mol
p-value: 0.036943
position 89
target 5' U GC CUGGG G C UUGG U 3'
UCU UGCUU GCCA G UCCGGGC UGC
GGA ACGAA UGGU C AGGUCUG ACG
miRNA 3' G UA U 5'
target: TRAV17
length: 484
miRNA : piR-hsa-13643
length: 27
mfe: -33.8 kcal/mol
p-value: 0.014418
position 424
target 5' U G GCUUC G 3'
CCUUGUU AUCACG CCGGGCA GCA
GGAACGA UGGUGC GGUCUGU CGU
miRNA 3' A A AA 5'
target: TRBV3-1
length: 391
miRNA : piR-hsa-13643
length: 27
mfe: -31.4 kcal/mol
p-value: 0.031516
position 15
target 5' C GG C UG GCCUCACUCUGCCAU G 3'
CCU G CUUGCC GUCU GGGC UGCA
GGA C GAAUGG CAGG UCUG ACGU
miRNA 3' A UG UA 5'
target: CYP2D7
length: 573
miRNA : piR-hsa-13643
length: 27
mfe: -32.1 kcal/mol
p-value: 0.040301
position 286
target 5' G GCA G UG ACG UG CG U 3'
CCU GCU GCC G CCGG GU UGC
GGA CGA UGG C GGUC UA ACG
miRNA 3' A A UG A UG U 5'
target: CYP2D7
length: 564
miRNA : piR-hsa-13643
length: 27
mfe: -33.0 kcal/mol
p-value: 0.026363
position 412
target 5' U GG CGG CCA AGCG G 3'
CCU GCUU GCCGCGUUC AGGCA GCG
GGA CGAA UGGUGCAGG UCUGU CGU
miRNA 3' A AA 5'
target: CYP2D7
length: 564
miRNA : piR-hsa-13643
length: 27
mfe: -32.1 kcal/mol
p-value: 0.039370
position 295
target 5' G GCA G UG ACG UG CG U 3'
CCU GCU GCC G CCGG GU UGC
GGA CGA UGG C GGUC UA ACG
miRNA 3' A A UG A UG U 5'
target: CYP2D7
length: 573
miRNA : piR-hsa-13643
length: 27
mfe: -32.1 kcal/mol
p-value: 0.040301
position 286
target 5' G GCA G UG ACG UG CG U 3'
CCU GCU GCC G CCGG GU UGC
GGA CGA UGG C GGUC UA ACG
miRNA 3' A A UG A UG U 5'
target: CYP2D7
length: 564
miRNA : piR-hsa-13643
length: 27
mfe: -33.0 kcal/mol
p-value: 0.026363
position 412
target 5' U GG CGG CCA AGCG G 3'
CCU GCUU GCCGCGUUC AGGCA GCG
GGA CGAA UGGUGCAGG UCUGU CGU
miRNA 3' A AA 5'
target: CYP2D7
length: 564
miRNA : piR-hsa-13643
length: 27
mfe: -32.1 kcal/mol
p-value: 0.039370
position 295
target 5' G GCA G UG ACG UG CG U 3'
CCU GCU GCC G CCGG GU UGC
GGA CGA UGG C GGUC UA ACG
miRNA 3' A A UG A UG U 5'
target: AC064853.2
length: 279
miRNA : piR-hsa-13643
length: 27
mfe: -29.8 kcal/mol
p-value: 0.038513
position 135
target 5' C C GCUG GUGG UGC G 3'
CC UGC UGCCGCG CU AGGC UGCA
GG ACG AUGGUGC GG UCUG ACGU
miRNA 3' A A A UA 5'
target: SCYGR10
length: 318
miRNA : piR-hsa-13643
length: 27
mfe: -29.8 kcal/mol
p-value: 0.047314
position 174
target 5' C C GCUG GUGG UGC G 3'
CC UGC UGCCGCG CU GGGC UGCA
GG ACG AUGGUGC GG UCUG ACGU
miRNA 3' A A A UA 5'
target: CYP2D7
length: 573
miRNA : piR-hsa-13643
length: 27
mfe: -32.1 kcal/mol
p-value: 0.040301
position 286
target 5' G GCA G UG ACG UG CG U 3'
CCU GCU GCC G CCGG GU UGC
GGA CGA UGG C GGUC UA ACG
miRNA 3' A A UG A UG U 5'
target: CYP2D7
length: 564
miRNA : piR-hsa-13643
length: 27
mfe: -33.0 kcal/mol
p-value: 0.026363
position 412
target 5' U GG CGG CCA AGCG G 3'
CCU GCUU GCCGCGUUC AGGCA GCG
GGA CGAA UGGUGCAGG UCUGU CGU
miRNA 3' A AA 5'
target: CYP2D7
length: 564
miRNA : piR-hsa-13643
length: 27
mfe: -32.1 kcal/mol
p-value: 0.039370
position 295
target 5' G GCA G UG ACG UG CG U 3'
CCU GCU GCC G CCGG GU UGC
GGA CGA UGG C GGUC UA ACG
miRNA 3' A A UG A UG U 5'
target: CYP2D7
length: 573
miRNA : piR-hsa-13643
length: 27
mfe: -32.1 kcal/mol
p-value: 0.040301
position 286
target 5' G GCA G UG ACG UG CG U 3'
CCU GCU GCC G CCGG GU UGC
GGA CGA UGG C GGUC UA ACG
miRNA 3' A A UG A UG U 5'
target: CYP2D7
length: 564
miRNA : piR-hsa-13643
length: 27
mfe: -33.0 kcal/mol
p-value: 0.026363
position 412
target 5' U GG CGG CCA AGCG G 3'
CCU GCUU GCCGCGUUC AGGCA GCG
GGA CGAA UGGUGCAGG UCUGU CGU
miRNA 3' A AA 5'
target: CYP2D7
length: 564
miRNA : piR-hsa-13643
length: 27
mfe: -32.1 kcal/mol
p-value: 0.039370
position 295
target 5' G GCA G UG ACG UG CG U 3'
CCU GCU GCC G CCGG GU UGC
GGA CGA UGG C GGUC UA ACG
miRNA 3' A A UG A UG U 5'
target: IGLJ7
length: 46
miRNA : piR-hsa-13643
length: 27
mfe: -25.8 kcal/mol
p-value: 0.011353
position 4
target 5' C G G AG C 3'
UGU UGCUGUGUUCGGA G GCA
ACG AUGGUGCAGGUCU U CGU
miRNA 3' GGA A G AA 5'
target: AC247036.4
length: 353
miRNA : piR-hsa-13643
length: 27
mfe: -31.3 kcal/mol
p-value: 0.027558
position 26
target 5' U UUUAAAAGAU UGUGAGG G 3'
CCUUGU UGCCAU GUCCAG UGCA
GGAACG AUGGUG CAGGUC ACGU
miRNA 3' A UGUA 5'
target: IGHV3-15
length: 439
miRNA : piR-hsa-13643
length: 27
mfe: -31.4 kcal/mol
p-value: 0.037017
position 106
target 5' U UUUAAAAGGU UGUGAGG G 3'
CCUUGC UGCUAU GUCCAG UGCA
GGAACG AUGGUG CAGGUC ACGU
miRNA 3' A UGUA 5'
target: IGKV1-9
length: 409
miRNA : piR-hsa-13643
length: 27
mfe: -33.1 kcal/mol
p-value: 0.015102
position 188
target 5' A CGG A A G 3'
CUUGC GCCA GUC GGGCAUU GCA
GAACG UGGU CAG UCUGUAA CGU
miRNA 3' G AA G G 5'
target: IGKV2D-29
length: 390
miRNA : piR-hsa-13643
length: 27
mfe: -30.6 kcal/mol
p-value: 0.043985
position 50
target 5' U GGG GCUAAUGCUCUGGA UG A AGUGC G 3'
CCU GCU UACC G UCC AGAUAUUGU
GGA CGA AUGG C AGG UCUGUAACG
miRNA 3' A UG U 5'
target: IGKV1D-43
length: 532
miRNA : piR-hsa-13643
length: 27
mfe: -35.0 kcal/mol
p-value: 0.009753
position 311
target 5' A GG A A G 3'
CUUGCU GCCA GUC GGGCAUU GCA
GAACGA UGGU CAG UCUGUAA CGU
miRNA 3' G A G G 5'
target: IGHV3-64D
length: 353
miRNA : piR-hsa-13643
length: 27
mfe: -31.3 kcal/mol
p-value: 0.027558
position 26
target 5' U UUUAAAAGAU UGUGAGG G 3'
CCUUGU UGCCAU GUCCAG UGCA
GGAACG AUGGUG CAGGUC ACGU
miRNA 3' A UGUA 5'
target: IGHV3-15
length: 437
miRNA : piR-hsa-13643
length: 27
mfe: -31.4 kcal/mol
p-value: 0.036759
position 106
target 5' U UUUAAAAGGU UGUGAGG G 3'
CCUUGC UGCUAU GUCCAG UGCA
GGAACG AUGGUG CAGGUC ACGU
miRNA 3' A UGUA 5'
target: IGKV1-9
length: 409
miRNA : piR-hsa-13643
length: 27
mfe: -33.1 kcal/mol
p-value: 0.015102
position 188
target 5' A CGG A A G 3'
CUUGC GCCA GUC GGGCAUU GCA
GAACG UGGU CAG UCUGUAA CGU
miRNA 3' G AA G G 5'
target: TRBJ2-2P
length: 46
miRNA : piR-hsa-13643
length: 27
mfe: -26.4 kcal/mol
p-value: 0.007876
position 9
target 5' C GG G 3'
GC UGCU GCGUCUGGGCG
CG AUGG UGCAGGUCUGU
miRNA 3' GGAA A AACGU 5'
target: TRBJ2-6
length: 53
miRNA : piR-hsa-13643
length: 27
mfe: -25.9 kcal/mol
p-value: 0.014183
position 1
target 5' C GGG A U UUUCGGGGCCG G 3'
UCU GCC ACGUCC GAC GCA
GGA UGG UGCAGG CUG CGU
miRNA 3' ACGAA U UAA 5'
target: TRBJ2-7
length: 47
miRNA : piR-hsa-13643
length: 27
mfe: -25.5 kcal/mol
p-value: 0.014278
position 2
target 5' U ACGA AG U GG CCAG U 3'
CCU GC UACU CG CCGGGCA GC
GGA CG AUGG GC GGUCUGU CG
miRNA 3' A A U A AA U 5'
target: TRBJ2-2P
length: 46
miRNA : piR-hsa-13643
length: 27
mfe: -26.4 kcal/mol
p-value: 0.007876
position 9
target 5' C GG G 3'
GC UGCU GCGUCUGGGCG
CG AUGG UGCAGGUCUGU
miRNA 3' GGAA A AACGU 5'
target: TRBJ2-6
length: 53
miRNA : piR-hsa-13643
length: 27
mfe: -25.9 kcal/mol
p-value: 0.014183
position 1
target 5' C GGG A U UUUCGGGGCCG G 3'
UCU GCC ACGUCC GAC GCA
GGA UGG UGCAGG CUG CGU
miRNA 3' ACGAA U UAA 5'
target: TRBJ2-7
length: 47
miRNA : piR-hsa-13643
length: 27
mfe: -25.6 kcal/mol
p-value: 0.013438
position 2
target 5' U ACGA AG GU GG CCAG U 3'
CCU GC UAC CG CCGGGCA GC
GGA CG AUG GC GGUCUGU CG
miRNA 3' A A GU A AA U 5'
target: TRAJ35
length: 59
miRNA : piR-hsa-13643
length: 27
mfe: -27.0 kcal/mol
p-value: 0.009523
position 17
target 5' G GCA UG G GGCACUCA UG U 3'
UGCU U CG GUCC AG AUUGU
ACGA A GU CAGG UC UAACG
miRNA 3' GGA UG G UG U 5'
target: TRAJ32
length: 66
miRNA : piR-hsa-13643
length: 27
mfe: -27.6 kcal/mol
p-value: 0.008532
position 45
target 5' A C C A 3'
CU UGCUUGCU GUCCAG CA
GA ACGAAUGG CAGGUC GU
miRNA 3' G UG U AACGU 5'
target: AC011476.6
length: 868
miRNA : piR-hsa-13643
length: 27
mfe: -33.3 kcal/mol
p-value: 0.043536
position 174
target 5' A C C A 3'
CCUU C UACUG CGUCUAGACA UGCA
GGAA G AUGGU GCAGGUCUGU ACGU
miRNA 3' C A A 5'
target: AC011476.6
length: 594
miRNA : piR-hsa-13643
length: 27
mfe: -33.3 kcal/mol
p-value: 0.024966
position 100
target 5' A C C A 3'
CCUU C UACUG CGUCUAGACA UGCA
GGAA G AUGGU GCAGGUCUGU ACGU
miRNA 3' C A A 5'
target: AC011476.4
length: 868
miRNA : piR-hsa-13643
length: 27
mfe: -33.3 kcal/mol
p-value: 0.043536
position 174
target 5' A C C A 3'
CCUU C UACUG CGUCUAGACA UGCA
GGAA G AUGGU GCAGGUCUGU ACGU
miRNA 3' C A A 5'
target: AC011476.4
length: 594
miRNA : piR-hsa-13643
length: 27
mfe: -33.3 kcal/mol
p-value: 0.024966
position 100
target 5' A C C A 3'
CCUU C UACUG CGUCUAGACA UGCA
GGAA G AUGGU GCAGGUCUGU ACGU
miRNA 3' C A A 5'
target: CACFD1
length: 356
miRNA : piR-hsa-13643
length: 27
mfe: -30.1 kcal/mol
p-value: 0.048907
position 157
target 5' C UC UC GU A 3'
CCU UGC UGCCA GUUCA GA UUGCA
GGA ACG AUGGU CAGGU CU AACGU
miRNA 3' A G GU 5'
target: AC226007.1
length: 1368
miRNA : piR-hsa-13643
length: 27
mfe: -39.3 kcal/mol
p-value: 0.006874
position 1238
target 5' G AUGG GUU G U 3'
CC GCU CCACGU CAGACAUUGC
GG CGA GGUGCA GUCUGUAACG
miRNA 3' AA AU G U 5'
target: AC226007.1
length: 845
miRNA : piR-hsa-13643
length: 27
mfe: -39.3 kcal/mol
p-value: 0.003149
position 715
target 5' G AUGG GUU G U 3'
CC GCU CCACGU CAGACAUUGC
GG CGA GGUGCA GUCUGUAACG
miRNA 3' AA AU G U 5'
target: AC011476.9
length: 868
miRNA : piR-hsa-13643
length: 27
mfe: -33.3 kcal/mol
p-value: 0.043536
position 174
target 5' A C C A 3'
CCUU C UACUG CGUCUAGACA UGCA
GGAA G AUGGU GCAGGUCUGU ACGU
miRNA 3' C A A 5'
target: AC011476.9
length: 594
miRNA : piR-hsa-13643
length: 27
mfe: -33.3 kcal/mol
p-value: 0.024966
position 100
target 5' A C C A 3'
CCUU C UACUG CGUCUAGACA UGCA
GGAA G AUGGU GCAGGUCUGU ACGU
miRNA 3' C A A 5'
target: TSEN34
length: 1915
miRNA : piR-hsa-13643
length: 27
mfe: -35.6 kcal/mol
p-value: 0.049338
position 316
target 5' A GCC UCUCG C 3'
GC CCGCGUCCAGAC GCA
CG GGUGCAGGUCUG CGU
miRNA 3' GGAA AAU UAA 5'
target: RPL7A
length: 1057
miRNA : piR-hsa-13643
length: 27
mfe: -34.5 kcal/mol
p-value: 0.034644
position 295
target 5' G GGGG G CC G 3'
CUUGCU GCCGC UCCAGA G UUGU
GAACGA UGGUG AGGUCU U AACG
miRNA 3' G A C G U 5'
target: TSEN34
length: 1915
miRNA : piR-hsa-13643
length: 27
mfe: -35.6 kcal/mol
p-value: 0.049338
position 316
target 5' A GCC UCUCG C 3'
GC CCGCGUCCAGAC GCA
CG GGUGCAGGUCUG CGU
miRNA 3' GGAA AAU UAA 5'
target: AC011476.5
length: 868
miRNA : piR-hsa-13643
length: 27
mfe: -33.3 kcal/mol
p-value: 0.043536
position 174
target 5' A C C A 3'
CCUU C UACUG CGUCUAGACA UGCA
GGAA G AUGGU GCAGGUCUGU ACGU
miRNA 3' C A A 5'
target: AC011476.5
length: 594
miRNA : piR-hsa-13643
length: 27
mfe: -33.3 kcal/mol
p-value: 0.024966
position 100
target 5' A C C A 3'
CCUU C UACUG CGUCUAGACA UGCA
GGAA G AUGGU GCAGGUCUGU ACGU
miRNA 3' C A A 5'
target: TSEN34
length: 1915
miRNA : piR-hsa-13643
length: 27
mfe: -35.6 kcal/mol
p-value: 0.049338
position 316
target 5' A GCC UCUCG C 3'
GC CCGCGUCCAGAC GCA
CG GGUGCAGGUCUG CGU
miRNA 3' GGAA AAU UAA 5'
target: CR753845.2
length: 69
miRNA : piR-hsa-13643
length: 27
mfe: -25.0 kcal/mol
p-value: 0.041609
position 14
target 5' G CAGC CU U GU CGAG G 3'
CCU UGCUU CC CGUU GGC GU
GGA ACGAA GG GCAG CUG CG
miRNA 3' U U GU UAA U 5'
target: TSEN34
length: 1915
miRNA : piR-hsa-13643
length: 27
mfe: -35.6 kcal/mol
p-value: 0.049338
position 316
target 5' A GCC UCUCG C 3'
GC CCGCGUCCAGAC GCA
CG GGUGCAGGUCUG CGU
miRNA 3' GGAA AAU UAA 5'
target: TSEN34
length: 1915
miRNA : piR-hsa-13643
length: 27
mfe: -35.6 kcal/mol
p-value: 0.049338
position 316
target 5' A GCC UCUCG C 3'
GC CCGCGUCCAGAC GCA
CG GGUGCAGGUCUG CGU
miRNA 3' GGAA AAU UAA 5'
target: AC011476.11
length: 868
miRNA : piR-hsa-13643
length: 27
mfe: -33.3 kcal/mol
p-value: 0.043536
position 174
target 5' A C C A 3'
CCUU C UACUG CGUCUAGACA UGCA
GGAA G AUGGU GCAGGUCUGU ACGU
miRNA 3' C A A 5'
target: AC011476.11
length: 594
miRNA : piR-hsa-13643
length: 27
mfe: -33.3 kcal/mol
p-value: 0.024966
position 100
target 5' A C C A 3'
CCUU C UACUG CGUCUAGACA UGCA
GGAA G AUGGU GCAGGUCUGU ACGU
miRNA 3' C A A 5'
target: AC011476.10
length: 868
miRNA : piR-hsa-13643
length: 27
mfe: -33.3 kcal/mol
p-value: 0.043536
position 174
target 5' A C C A 3'
CCUU C UACUG CGUCUAGACA UGCA
GGAA G AUGGU GCAGGUCUGU ACGU
miRNA 3' C A A 5'
target: AC011476.10
length: 594
miRNA : piR-hsa-13643
length: 27
mfe: -33.3 kcal/mol
p-value: 0.024966
position 100
target 5' A C C A 3'
CCUU C UACUG CGUCUAGACA UGCA
GGAA G AUGGU GCAGGUCUGU ACGU
miRNA 3' C A A 5'
target: TSEN34
length: 1915
miRNA : piR-hsa-13643
length: 27
mfe: -35.6 kcal/mol
p-value: 0.049338
position 316
target 5' A GCC UCUCG C 3'
GC CCGCGUCCAGAC GCA
CG GGUGCAGGUCUG CGU
miRNA 3' GGAA AAU UAA 5'
target: RAD9A
length: 578
miRNA : piR-hsa-13643
length: 27
mfe: -32.4 kcal/mol
p-value: 0.035739
position 368
target 5' C GAAUG CGGAGCA CUGGUG CU A 3'
CCU GC GCCGC GUCCAG GCAUUGCA
GGA CG UGGUG CAGGUC UGUAACGU
miRNA 3' A AA 5'
target: RAD9A
length: 586
miRNA : piR-hsa-13643
length: 27
mfe: -32.4 kcal/mol
p-value: 0.036477
position 443
target 5' C GAAUG CGGAGCA CUGGUG CU A 3'
CCU GC GCCGC GUCCAG GCAUUGCA
GGA CG UGGUG CAGGUC UGUAACGU
miRNA 3' A AA 5'
target: PLIN3
length: 1699
miRNA : piR-hsa-13643
length: 27
mfe: -35.6 kcal/mol
p-value: 0.042218
position 544
target 5' C GGGC C CG C 3'
CC GCU ACCAUGUUC GGACAUUGC
GG CGA UGGUGCAGG UCUGUAACG
miRNA 3' AA A U 5'
target: PLIN3
length: 1535
miRNA : piR-hsa-13643
length: 27
mfe: -35.6 kcal/mol
p-value: 0.036872
position 1071
target 5' C GGGC C CG C 3'
CC GCU ACCAUGUUC GGACAUUGC
GG CGA UGGUGCAGG UCUGUAACG
miRNA 3' AA A U 5'
target: PLIN3
length: 629
miRNA : piR-hsa-13643
length: 27
mfe: -32.5 kcal/mol
p-value: 0.038745
position 174
target 5' C GCAGAG GCC GG G 3'
UGCU ACCAUGUCU GACG GCA
ACGA UGGUGCAGG CUGU CGU
miRNA 3' GGA A U AA 5'
target: PLIN3
length: 604
miRNA : piR-hsa-13643
length: 27
mfe: -32.5 kcal/mol
p-value: 0.036499
position 484
target 5' C GCAGAG GCC GG G 3'
UGCU ACCAUGUCU GACG GCA
ACGA UGGUGCAGG CUGU CGU
miRNA 3' GGA A U AA 5'
target: CYFIP2
length: 377
miRNA : piR-hsa-13643
length: 27
mfe: -32.8 kcal/mol
p-value: 0.015175
position 41
target 5' G G G GA G 3'
CUUUGCUU CCA G CAGACA GCA
GGAACGAA GGU C GUCUGU CGU
miRNA 3' U G AG AA 5'
target: CYFIP2
length: 576
miRNA : piR-hsa-13643
length: 27
mfe: -34.7 kcal/mol
p-value: 0.012719
position 214
target 5' A CC C G UGGAG G 3'
CCU GCUU CCA GUUCAGGC UGCA
GGA CGAA GGU CAGGUCUG ACGU
miRNA 3' A U G UA 5'
target: CYFIP2
length: 745
miRNA : piR-hsa-13643
length: 27
mfe: -33.2 kcal/mol
p-value: 0.036546
position 715
target 5' U AAAG U UG G 3'
CUUUGCUUACUAC CCA GGC GCA
GGAACGAAUGGUG GGU CUG CGU
miRNA 3' CA UAA 5'
target: CYFIP2
length: 579
miRNA : piR-hsa-13643
length: 27
mfe: -33.2 kcal/mol
p-value: 0.025101
position 95
target 5' U AAAG U UG G 3'
CUUUGCUUACUAC CCA GGC GCA
GGAACGAAUGGUG GGU CUG CGU
miRNA 3' CA UAA 5'
target: BTK
length: 705
miRNA : piR-hsa-13643
length: 27
mfe: -32.8 kcal/mol
p-value: 0.040124
position 126
target 5' A GAGGGAGA GCC U UCA G 3'
CCU UGC ACCGC UCCAGAC GCA
GGA ACG UGGUG AGGUCUG CGU
miRNA 3' AA C UAA 5'
target: NUB1
length: 586
miRNA : piR-hsa-13643
length: 27
mfe: -32.0 kcal/mol
p-value: 0.043533
position 389
target 5' C A CAG UG C CUG U 3'
CC UGCU UGCU G CCAGGC GC
GG ACGA AUGG C GGUCUG CG
miRNA 3' A UG A UAA U 5'
target: KIT
length: 538
miRNA : piR-hsa-13643
length: 27
mfe: -36.2 kcal/mol
p-value: 0.005766
position 120
target 5' U AC G U 3'
CCU UGCU UCGCGUCCAGACA GC
GGA ACGA GGUGCAGGUCUGU CG
miRNA 3' AU AA U 5'
target: ZNF385D
length: 1050
miRNA : piR-hsa-13643
length: 27
mfe: -33.9 kcal/mol
p-value: 0.044083
position 806
target 5' A AU G C 3'
GCUUACCAU UCCAGAUA UGC
CGAAUGGUG AGGUCUGU ACG
miRNA 3' GGAA C A U 5'
target: ATRNL1
length: 311
miRNA : piR-hsa-13643
length: 27
mfe: -30.2 kcal/mol
p-value: 0.037834
position 220
target 5' A GG UG CCUU UG GAA G 3'
CUUG UGCU GUCU G GU GCA
GAAC AUGG CAGG C UA CGU
miRNA 3' G GA UG U UG A 5'
target: ATRNL1
length: 529
miRNA : piR-hsa-13643
length: 27
mfe: -34.6 kcal/mol
p-value: 0.011585
position 182
target 5' C G CG AC A 3'
UGCUUGCCA G CCAGACAU UG
ACGAAUGGU C GGUCUGUA AC
miRNA 3' GGA G A GU 5'
target: MRPL24
length: 514
miRNA : piR-hsa-13643
length: 27
mfe: -31.4 kcal/mol
p-value: 0.046888
position 51
target 5' C A AGG GAG GG G 3'
CCU G UGCC CGUCC AGGCA UGCG
GGA C AUGG GCAGG UCUGU ACGU
miRNA 3' A GA U A 5'
target: SSH3
length: 264
miRNA : piR-hsa-13643
length: 27
mfe: -32.4 kcal/mol
p-value: 0.009937
position 109
target 5' A CC GAC UCA GG C 3'
CCU UGU ACCACG CCAGA CA GCA
GGA ACG UGGUGC GGUCU GU CGU
miRNA 3' AA A AA 5'
target: RRNAD1
length: 459
miRNA : piR-hsa-13643
length: 27
mfe: -30.9 kcal/mol
p-value: 0.049665
position 279
target 5' A C G CUGAA C G C 3'
CC UGCU GCC GUCCA GGCGU UGC
GG ACGA UGG CAGGU CUGUA ACG
miRNA 3' A A UG U 5'
target: C12orf42
length: 495
miRNA : piR-hsa-13643
length: 27
mfe: -32.3 kcal/mol
p-value: 0.029561
position 85
target 5' U A CUU A 3'
UCUUGCU ACCA UCAGAC UUGCA
GGAACGA UGGU GGUCUG AACGU
miRNA 3' A GCA U 5'
target: C12orf42
length: 555
miRNA : piR-hsa-13643
length: 27
mfe: -32.3 kcal/mol
p-value: 0.035166
position 266
target 5' U A CUU A 3'
UCUUGCU ACCA UCAGAC UUGCA
GGAACGA UGGU GGUCUG AACGU
miRNA 3' A GCA U 5'
target: TSC1
length: 549
miRNA : piR-hsa-13643
length: 27
mfe: -31.9 kcal/mol
p-value: 0.041348
position 464
target 5' A GUGGAUUA UG AAA CUCUCAGCCG C 3'
CCUUG UUACC G CCAG GCAUUGCA
GGAAC AAUGG C GGUC UGUAACGU
miRNA 3' G UG A 5'
target: RHBG
length: 923
miRNA : piR-hsa-13643
length: 27
mfe: -34.3 kcal/mol
p-value: 0.031084
position 788
target 5' A GGC AACC U U 3'
CCU UGCUUGCCAUG CC GAC UUGC
GGA ACGAAUGGUGC GG CUG AACG
miRNA 3' A U U U 5'
target: RHBG
length: 1927
miRNA : piR-hsa-13643
length: 27
mfe: -36.0 kcal/mol
p-value: 0.042512
position 1282
target 5' A GCAG A CA C 3'
GC UGCCACGUC CAGGC UGCA
CG AUGGUGCAG GUCUG ACGU
miRNA 3' GGAA A UA 5'
target: RHBG
length: 1790
miRNA : piR-hsa-13643
length: 27
mfe: -36.0 kcal/mol
p-value: 0.038587
position 1187
target 5' A GCAG A CA C 3'
GC UGCCACGUC CAGGC UGCA
CG AUGGUGCAG GUCUG ACGU
miRNA 3' GGAA A UA 5'
target: RHBG
length: 1912
miRNA : piR-hsa-13643
length: 27
mfe: -36.0 kcal/mol
p-value: 0.042081
position 1309
target 5' A GCAG A CA C 3'
GC UGCCACGUC CAGGC UGCA
CG AUGGUGCAG GUCUG ACGU
miRNA 3' GGAA A UA 5'
target: RHBG
length: 1862
miRNA : piR-hsa-13643
length: 27
mfe: -36.0 kcal/mol
p-value: 0.040646
position 1259
target 5' A GCAG A CA C 3'
GC UGCCACGUC CAGGC UGCA
CG AUGGUGCAG GUCUG ACGU
miRNA 3' GGAA A UA 5'
target: RHBG
length: 1984
miRNA : piR-hsa-13643
length: 27
mfe: -36.0 kcal/mol
p-value: 0.044153
position 1381
target 5' A GCAG A CA C 3'
GC UGCCACGUC CAGGC UGCA
CG AUGGUGCAG GUCUG ACGU
miRNA 3' GGAA A UA 5'
target: RHBG
length: 324
miRNA : piR-hsa-13643
length: 27
mfe: -36.0 kcal/mol
p-value: 0.002532
position 95
target 5' A GCAG A CA C 3'
GC UGCCACGUC CAGGC UGCA
CG AUGGUGCAG GUCUG ACGU
miRNA 3' GGAA A UA 5'
target: RHBG
length: 720
miRNA : piR-hsa-13643
length: 27
mfe: -36.0 kcal/mol
p-value: 0.010221
position 471
target 5' A GCAG A CA C 3'
GC UGCCACGUC CAGGC UGCA
CG AUGGUGCAG GUCUG ACGU
miRNA 3' GGAA A UA 5'
target: CCT3
length: 581
miRNA : piR-hsa-13643
length: 27
mfe: -31.8 kcal/mol
p-value: 0.046958
position 282
target 5' G A G U 3'
UGCUUACCGC AGGCAUUG A
ACGAAUGGUG UCUGUAAC U
miRNA 3' GGA CAGG G 5'
target: CCT3
length: 593
miRNA : piR-hsa-13643
length: 27
mfe: -31.8 kcal/mol
p-value: 0.048368
position 356
target 5' G A G U 3'
UGCUUACCGC AGGCAUUG A
ACGAAUGGUG UCUGUAAC U
miRNA 3' GGA CAGG G 5'
target: CCT3
length: 583
miRNA : piR-hsa-13643
length: 27
mfe: -31.8 kcal/mol
p-value: 0.047192
position 429
target 5' G A G U 3'
UGCUUACCGC AGGCAUUG A
ACGAAUGGUG UCUGUAAC U
miRNA 3' GGA CAGG G 5'
target: CCT3
length: 513
miRNA : piR-hsa-13643
length: 27
mfe: -31.8 kcal/mol
p-value: 0.039090
position 470
target 5' G A G U 3'
UGCUUACCGC AGGCAUUG A
ACGAAUGGUG UCUGUAAC U
miRNA 3' GGA CAGG G 5'
target: NEK3
length: 141
miRNA : piR-hsa-13643
length: 27
mfe: -27.7 kcal/mol
p-value: 0.034566
position 85
target 5' A AAAGAAAUAAGGCU CAAGCUGAA C U 3'
UGUUUGCCAUG UCC GGACA UUGUA
ACGAAUGGUGC AGG UCUGU AACGU
miRNA 3' GGA 5'
target: NR1H2
length: 235
miRNA : piR-hsa-13643
length: 27
mfe: -31.1 kcal/mol
p-value: 0.015326
position 178
target 5' A GAG GU C C 3'
CC UGCUU CU AUG CCAGGCA UGCG
GG ACGAA GG UGC GGUCUGU ACGU
miRNA 3' A U A A 5'
target: NR1H2
length: 235
miRNA : piR-hsa-13643
length: 27
mfe: -30.7 kcal/mol
p-value: 0.018675
position 92
target 5' C A UCA U G G 3'
CCUUGC UGCU GUUCA GAUGUUG A
GGAACG AUGG CAGGU CUGUAAC U
miRNA 3' A UG G 5'
target: NR1H2
length: 235
miRNA : piR-hsa-13643
length: 27
mfe: -28.7 kcal/mol
p-value: 0.049789
position 135
target 5' C GGAAAA U C A 3'
CCUUGC ACC AC UUCAGACA
GGAACG UGG UG AGGUCUGU
miRNA 3' AA C AACGU 5'
target: NR1H2
length: 1466
miRNA : piR-hsa-13643
length: 27
mfe: -34.7 kcal/mol
p-value: 0.049809
position 1114
target 5' A CGG GG G 3'
GC GCCGCGU AGGCGUUGCA
CG UGGUGCA UCUGUAACGU
miRNA 3' GGAA AA GG 5'
target: NR1H2
length: 874
miRNA : piR-hsa-13643
length: 27
mfe: -34.7 kcal/mol
p-value: 0.024211
position 674
target 5' A CGG GG G 3'
GC GCCGCGU AGGCGUUGCA
CG UGGUGCA UCUGUAACGU
miRNA 3' GGAA AA GG 5'
target: ITGAL
length: 561
miRNA : piR-hsa-13643
length: 27
mfe: -32.1 kcal/mol
p-value: 0.039060
position 481
target 5' A GA G 3'
CUUUG UACCGCGUCC UGCA
GGAAC AUGGUGCAGG ACGU
miRNA 3' GA UCUGUA 5'
target: ITGAL
length: 496
miRNA : piR-hsa-13643
length: 27
mfe: -32.1 kcal/mol
p-value: 0.032458
position 366
target 5' A GA G 3'
CUUUG UACCGCGUCC UGCA
GGAAC AUGGUGCAGG ACGU
miRNA 3' GA UCUGUA 5'
target: ITGAL
length: 559
miRNA : piR-hsa-13643
length: 27
mfe: -32.2 kcal/mol
p-value: 0.037164
position 435
target 5' A GG UGGACC C 3'
UGCUUACU GUCCAG C UGCA
ACGAAUGG CAGGUC G ACGU
miRNA 3' GGA UG U UA 5'
target: ITGAL
length: 559
miRNA : piR-hsa-13643
length: 27
mfe: -32.1 kcal/mol
p-value: 0.038854
position 224
target 5' A GA G 3'
CUUUG UACCGCGUCC UGCA
GGAAC AUGGUGCAGG ACGU
miRNA 3' GA UCUGUA 5'
target: ITGAL
length: 536
miRNA : piR-hsa-13643
length: 27
mfe: -32.1 kcal/mol
p-value: 0.036495
position 223
target 5' A GA G 3'
CUUUG UACCGCGUCC UGCA
GGAAC AUGGUGCAGG ACGU
miRNA 3' GA UCUGUA 5'
target: ITGAL
length: 557
miRNA : piR-hsa-13643
length: 27
mfe: -32.1 kcal/mol
p-value: 0.038648
position 223
target 5' A GA G 3'
CUUUG UACCGCGUCC UGCA
GGAAC AUGGUGCAGG ACGU
miRNA 3' GA UCUGUA 5'
target: ITGAL
length: 545
miRNA : piR-hsa-13643
length: 27
mfe: -32.1 kcal/mol
p-value: 0.037415
position 265
target 5' A GA G 3'
CUUUG UACCGCGUCC UGCA
GGAAC AUGGUGCAGG ACGU
miRNA 3' GA UCUGUA 5'
target: ITGAL
length: 575
miRNA : piR-hsa-13643
length: 27
mfe: -32.2 kcal/mol
p-value: 0.038753
position 470
target 5' A GG UGGACC C 3'
UGCUUACU GUCCAG C UGCA
ACGAAUGG CAGGUC G ACGU
miRNA 3' GGA UG U UA 5'
target: UROD
length: 682
miRNA : piR-hsa-13643
length: 27
mfe: -34.8 kcal/mol
p-value: 0.015908
position 430
target 5' G GAUUG UG UG GCC G 3'
CU GCUU C GU CCAG CAUUGCA
GA CGAA G CA GGUC GUAACGU
miRNA 3' G A UG UG U 5'
target: BGLAP
length: 506
miRNA : piR-hsa-13643
length: 27
mfe: -32.0 kcal/mol
p-value: 0.035000
position 90
target 5' A UGG GG A 3'
CUUUGC AUCGC CCAGGCA UGCG
GGAACG UGGUG GGUCUGU ACGU
miRNA 3' AA CA A 5'
target: MARF1
length: 489
miRNA : piR-hsa-13643
length: 27
mfe: -31.5 kcal/mol
p-value: 0.041639
position 133
target 5' U CA G C UCAC GA G 3'
CCUUGUUUGCC G G CCAG ACA GCA
GGAACGAAUGG U C GGUC UGU CGU
miRNA 3' G A AA 5'
target: PDK3
length: 1809
miRNA : piR-hsa-13643
length: 27
mfe: -36.8 kcal/mol
p-value: 0.028476
position 184
target 5' C GGCC CGG GGUCUG C 3'
CCUUGC ACC GCGUCUAGGCG UGCG
GGAACG UGG UGCAGGUCUGU ACGU
miRNA 3' AA A 5'
target: BMERB1
length: 462
miRNA : piR-hsa-13643
length: 27
mfe: -33.0 kcal/mol
p-value: 0.019286
position 156
target 5' C A U C UUGACUGCCU A 3'
CC UGCUU CCGCGUC CAG C AUUGCA
GG ACGAA GGUGCAG GUC G UAACGU
miRNA 3' A U U 5'
target: SLC22A18
length: 635
miRNA : piR-hsa-13643
length: 27
mfe: -32.4 kcal/mol
p-value: 0.041048
position 308
target 5' A U G U C C 3'
UCUUGCUUACC ACGU C GGC GC
GGAACGAAUGG UGCA G CUG CG
miRNA 3' G U UAA U 5'
target: SLC22A18
length: 684
miRNA : piR-hsa-13643
length: 27
mfe: -32.4 kcal/mol
p-value: 0.045697
position 46
target 5' A U G U C C 3'
UCUUGCUUACC ACGU C GGC GC
GGAACGAAUGG UGCA G CUG CG
miRNA 3' G U UAA U 5'
target: SLC22A18
length: 588
miRNA : piR-hsa-13643
length: 27
mfe: -33.1 kcal/mol
p-value: 0.026870
position 63
target 5' G G A C 3'
GCU GCCAC GUCCAGACG
CGA UGGUG CAGGUCUGU
miRNA 3' GGAA A AACGU 5'
target: DUOXA1
length: 519
miRNA : piR-hsa-13643
length: 27
mfe: -31.4 kcal/mol
p-value: 0.047559
position 47
target 5' C GGG GCAG G CAAA A 3'
CC GC ACCA G CCAGGCGU GCA
GG CG UGGU C GGUCUGUA CGU
miRNA 3' AA AA G A A 5'
target: HIST1H2AI
length: 503
miRNA : piR-hsa-13643
length: 27
mfe: -36.8 kcal/mol
p-value: 0.003902
position 2
target 5' G G A 3'
CCUU UUGCCAUGUCUGGGCGU GCA
GGAA AAUGGUGCAGGUCUGUA CGU
miRNA 3' CG A 5'
target: VWDE
length: 499
miRNA : piR-hsa-13643
length: 27
mfe: -33.2 kcal/mol
p-value: 0.019815
position 80
target 5' A GUGUGUC UG CU U GCCU G 3'
CCU UGCUUGCC G UCCA GGCA UUGU
GGA ACGAAUGG C AGGU CUGU AACG
miRNA 3' UG U 5'
target: HIST1H4K
length: 312
miRNA : piR-hsa-13643
length: 27
mfe: -33.2 kcal/mol
p-value: 0.009070
position 110
target 5' G C GC GAA C 3'
CCUUGCU GCCGCG GGCGU GCG
GGAACGA UGGUGC CUGUA CGU
miRNA 3' A AGGU A 5'
target: HIST1H3I
length: 411
miRNA : piR-hsa-13643
length: 27
mfe: -31.3 kcal/mol
p-value: 0.035019
position 378
target 5' G GC A GAGG G GG U 3'
CUUGC GCCGC UCC GGA A GCA
GAACG UGGUG AGG UCU U CGU
miRNA 3' G AA C G AA 5'
target: HIST1H4J
length: 373
miRNA : piR-hsa-13643
length: 27
mfe: -33.2 kcal/mol
p-value: 0.012352
position 127
target 5' G C GC GAA C 3'
CCUUGCU GCCGCG GGCGU GCG
GGAACGA UGGUGC CUGUA CGU
miRNA 3' A AGGU A 5'
target: HIST1H4J
length: 373
miRNA : piR-hsa-13643
length: 27
mfe: -31.9 kcal/mol
p-value: 0.022735
position 6
target 5' C CG C CG A 3'
UCUUGCU UCAUGUCUGG CG GCA
GGAACGA GGUGCAGGUC GU CGU
miRNA 3' AU U AA 5'
target: HIST1H2BN
length: 1723
miRNA : piR-hsa-13643
length: 27
mfe: -42.0 kcal/mol
p-value: 0.003266
position 557
target 5' G C C GAC A 3'
CC UGCUUGCCACGUCC GACAU GUA
GG ACGAAUGGUGCAGG CUGUA CGU
miRNA 3' A U A 5'
target: DUOXA2
length: 1755
miRNA : piR-hsa-13643
length: 27
mfe: -35.4 kcal/mol
p-value: 0.047686
position 204
target 5' C CUC GCCCCAGC U 3'
GCU CCGCGUCCAGGCA UUGC
CGA GGUGCAGGUCUGU AACG
miRNA 3' GGAA AU U 5'
target: DUOXA2
length: 1433
miRNA : piR-hsa-13643
length: 27
mfe: -35.4 kcal/mol
p-value: 0.036423
position 204
target 5' C CUC GCCCCAGC U 3'
GCU CCGCGUCCAGGCA UUGC
CGA GGUGCAGGUCUGU AACG
miRNA 3' GGAA AU U 5'
target: DUOXA2
length: 1724
miRNA : piR-hsa-13643
length: 27
mfe: -35.4 kcal/mol
p-value: 0.046592
position 56
target 5' C CUC GCCCCAGC U 3'
GCU CCGCGUCCAGGCA UUGC
CGA GGUGCAGGUCUGU AACG
miRNA 3' GGAA AU U 5'
target: OR2H1
length: 986
miRNA : piR-hsa-13643
length: 27
mfe: -33.8 kcal/mol
p-value: 0.042134
position 670
target 5' U CUCUUAUGGA U C G U 3'
CCUUGC GCCAC G CCAGGCA UGC
GGAACG UGGUG C GGUCUGU ACG
miRNA 3' AA A A U 5'
target: OR2H1
length: 973
miRNA : piR-hsa-13643
length: 27
mfe: -33.8 kcal/mol
p-value: 0.041363
position 657
target 5' U CUCUUAUGGA U C G U 3'
CCUUGC GCCAC G CCAGGCA UGC
GGAACG UGGUG C GGUCUGU ACG
miRNA 3' AA A A U 5'
target: DUOX2
length: 440
miRNA : piR-hsa-13643
length: 27
mfe: -36.5 kcal/mol
p-value: 0.003527
position 371
target 5' G CUC CC C 3'
CUUUGC GCCAC UCGGACAUUGCA
GGAACG UGGUG GGUCUGUAACGU
miRNA 3' AA CA 5'
target: DUOX2
length: 497
miRNA : piR-hsa-13643
length: 27
mfe: -31.5 kcal/mol
p-value: 0.042659
position 384
target 5' G CCCC UG A A C 3'
CCUUGC UGCC GU CCAGG GC
GGAACG AUGG CA GGUCU CG
miRNA 3' A UG GUAA U 5'
target: MBOAT7
length: 564
miRNA : piR-hsa-13643
length: 27
mfe: -32.2 kcal/mol
p-value: 0.037659
position 247
target 5' G C CC C U UCUG C 3'
CC UGCU UGCCACG CC GGC GC
GG ACGA AUGGUGC GG CUG CG
miRNA 3' A A U UAA U 5'
target: MBOAT7
length: 600
miRNA : piR-hsa-13643
length: 27
mfe: -32.2 kcal/mol
p-value: 0.041258
position 191
target 5' G C CC C U UCUG C 3'
CC UGCU UGCCACG CC GGC GC
GG ACGA AUGGUGC GG CUG CG
miRNA 3' A A U UAA U 5'
target: MBOAT7
length: 544
miRNA : piR-hsa-13643
length: 27
mfe: -32.2 kcal/mol
p-value: 0.035684
position 207
target 5' G C CC C U UCUG C 3'
CC UGCU UGCCACG CC GGC GC
GG ACGA AUGGUGC GG CUG CG
miRNA 3' A A U UAA U 5'
target: IFT88
length: 968
miRNA : piR-hsa-13643
length: 27
mfe: -35.2 kcal/mol
p-value: 0.022739
position 460
target 5' A CUC UG G A 3'
GUU CC GUCCAGA AUUGCA
CGA GG CAGGUCU UAACGU
miRNA 3' GGAA AU UG G 5'
target: IFT88
length: 407
miRNA : piR-hsa-13643
length: 27
mfe: -35.2 kcal/mol
p-value: 0.005622
position 63
target 5' A CUC UG G A 3'
GUU CC GUCCAGA AUUGCA
CGA GG CAGGUCU UAACGU
miRNA 3' GGAA AU UG G 5'
target: UBE2L6
length: 668
miRNA : piR-hsa-13643
length: 27
mfe: -32.3 kcal/mol
p-value: 0.046135
position 70
target 5' U GCAU UG G UC U 3'
CCUUG CU GU CCAGGCAU UGC
GGAAC GG CA GGUCUGUA ACG
miRNA 3' GAAU UG U 5'
target: UBE2L6
length: 628
miRNA : piR-hsa-13643
length: 27
mfe: -32.3 kcal/mol
p-value: 0.042200
position 47
target 5' U GCAU UG G UC U 3'
CCUUG CU GU CCAGGCAU UGC
GGAAC GG CA GGUCUGUA ACG
miRNA 3' GAAU UG U 5'
target: TMEM239
length: 571
miRNA : piR-hsa-13643
length: 27
mfe: -33.1 kcal/mol
p-value: 0.025692
position 23
target 5' C C GGC U C G 3'
UGC UGCCA CGUCC GGGCG UGCA
ACG AUGGU GCAGG UCUGU ACGU
miRNA 3' GGA A A 5'
target: PLCB2
length: 539
miRNA : piR-hsa-13643
length: 27
mfe: -33.1 kcal/mol
p-value: 0.023505
position 435
target 5' C G GCC UCC U 3'
CCUUGU UGCCAUG CUGGAC UGC
GGAACG AUGGUGC GGUCUG ACG
miRNA 3' A A UA U 5'
target: PIGT
length: 957
miRNA : piR-hsa-13643
length: 27
mfe: -34.0 kcal/mol
p-value: 0.037152
position 611
target 5' G CCACACCAGC UC G U 3'
CUUGUU UACCAC CCAGGCA UGCA
GAACGA AUGGUG GGUCUGU ACGU
miRNA 3' G CA A 5'
target: PIGT
length: 970
miRNA : piR-hsa-13643
length: 27
mfe: -34.0 kcal/mol
p-value: 0.037865
position 362
target 5' G CCACACCAGC UC G U 3'
CUUGUU UACCAC CCAGGCA UGCA
GAACGA AUGGUG GGUCUGU ACGU
miRNA 3' G CA A 5'
target: PIGT
length: 952
miRNA : piR-hsa-13643
length: 27
mfe: -34.0 kcal/mol
p-value: 0.036879
position 716
target 5' G CCACACCAGC UC G U 3'
CUUGUU UACCAC CCAGGCA UGCA
GAACGA AUGGUG GGUCUGU ACGU
miRNA 3' G CA A 5'
target: PIGT
length: 961
miRNA : piR-hsa-13643
length: 27
mfe: -34.0 kcal/mol
p-value: 0.037371
position 527
target 5' G CCACACCAGC UC G U 3'
CUUGUU UACCAC CCAGGCA UGCA
GAACGA AUGGUG GGUCUGU ACGU
miRNA 3' G CA A 5'
target: PIGT
length: 1076
miRNA : piR-hsa-13643
length: 27
mfe: -34.0 kcal/mol
p-value: 0.043734
position 533
target 5' G CCACACCAGC UC G U 3'
CUUGUU UACCAC CCAGGCA UGCA
GAACGA AUGGUG GGUCUGU ACGU
miRNA 3' G CA A 5'
target: PIGT
length: 861
miRNA : piR-hsa-13643
length: 27
mfe: -34.0 kcal/mol
p-value: 0.031950
position 323
target 5' G CCACACCAGC UC G U 3'
CUUGUU UACCAC CCAGGCA UGCA
GAACGA AUGGUG GGUCUGU ACGU
miRNA 3' G CA A 5'
target: PIGT
length: 832
miRNA : piR-hsa-13643
length: 27
mfe: -34.0 kcal/mol
p-value: 0.030403
position 325
target 5' G CCACACCAGC UC G U 3'
CUUGUU UACCAC CCAGGCA UGCA
GAACGA AUGGUG GGUCUGU ACGU
miRNA 3' G CA A 5'
target: PIGT
length: 439
miRNA : piR-hsa-13643
length: 27
mfe: -34.0 kcal/mol
p-value: 0.011193
position 368
target 5' G CCACACCAGC UC G U 3'
CUUGUU UACCAC CCAGGCA UGCA
GAACGA AUGGUG GGUCUGU ACGU
miRNA 3' G CA A 5'
target: SREK1
length: 458
miRNA : piR-hsa-13643
length: 27
mfe: -31.8 kcal/mol
p-value: 0.032916
position 55
target 5' U GUC GA G G G 3'
CC GCU CGCGUC UAGACGUUG G
GG CGA GUGCAG GUCUGUAAC U
miRNA 3' AA AUG G 5'
target: SREK1
length: 559
miRNA : piR-hsa-13643
length: 27
mfe: -31.8 kcal/mol
p-value: 0.044388
position 12
target 5' U GUC GA G G G 3'
CC GCU CGCGUC UAGACGUUG G
GG CGA GUGCAG GUCUGUAAC U
miRNA 3' AA AUG G 5'
target: TSEN34
length: 1424
miRNA : piR-hsa-13643
length: 27
mfe: -35.6 kcal/mol
p-value: 0.033296
position 395
target 5' A GCC UCUCG C 3'
GC CCGCGUCCAGAC GCA
CG GGUGCAGGUCUG CGU
miRNA 3' GGAA AAU UAA 5'
target: TSEN34
length: 1548
miRNA : piR-hsa-13643
length: 27
mfe: -35.6 kcal/mol
p-value: 0.037293
position 519
target 5' A GCC UCUCG C 3'
GC CCGCGUCCAGAC GCA
CG GGUGCAGGUCUG CGU
miRNA 3' GGAA AAU UAA 5'
target: TSEN34
length: 1348
miRNA : piR-hsa-13643
length: 27
mfe: -35.6 kcal/mol
p-value: 0.030872
position 320
target 5' A GCC UCUCG C 3'
GC CCGCGUCCAGAC GCA
CG GGUGCAGGUCUG CGU
miRNA 3' GGAA AAU UAA 5'
target: TSEN34
length: 852
miRNA : piR-hsa-13643
length: 27
mfe: -35.6 kcal/mol
p-value: 0.015830
position 315
target 5' A GCC UCUCG C 3'
GC CCGCGUCCAGAC GCA
CG GGUGCAGGUCUG CGU
miRNA 3' GGAA AAU UAA 5'
target: TSEN34
length: 956
miRNA : piR-hsa-13643
length: 27
mfe: -35.6 kcal/mol
p-value: 0.018835
position 437
target 5' A GCC UCUCG C 3'
GC CCGCGUCCAGAC GCA
CG GGUGCAGGUCUG CGU
miRNA 3' GGAA AAU UAA 5'
target: TSEN34
length: 1912
miRNA : piR-hsa-13643
length: 27
mfe: -35.6 kcal/mol
p-value: 0.049239
position 316
target 5' A GCC UCUCG C 3'
GC CCGCGUCCAGAC GCA
CG GGUGCAGGUCUG CGU
miRNA 3' GGAA AAU UAA 5'
target: RPS21
length: 401
miRNA : piR-hsa-13643
length: 27
mfe: -31.4 kcal/mol
p-value: 0.032186
position 217
target 5' G C U G C G 3'
CUUUGCU AUCAC UC GGACAU GU
GGAACGA UGGUG AG UCUGUA CG
miRNA 3' A C G A U 5'
target: RNF5
length: 357
miRNA : piR-hsa-13643
length: 27
mfe: -30.4 kcal/mol
p-value: 0.042135
position 206
target 5' A GUAC G UCAUCAGUGGCUGG CG C 3'
CCU UGUU GCCAUGUCU AGACA GC
GGA ACGA UGGUGCAGG UCUGU CG
miRNA 3' A AA U 5'
target: KCNIP3
length: 567
miRNA : piR-hsa-13643
length: 27
mfe: -32.4 kcal/mol
p-value: 0.034729
position 269
target 5' A G GGG A 3'
GCU UGCCAUG CUGGGCAU GCA
CGA AUGGUGC GGUCUGUA CGU
miRNA 3' GGAA A A 5'
target: KCNIP3
length: 985
miRNA : piR-hsa-13643
length: 27
mfe: -33.4 kcal/mol
p-value: 0.049530
position 281
target 5' G CG GGCA G GGAGCUG C 3'
CC GCUUGCCAUG UCCA GGCAU UGCG
GG CGAAUGGUGC AGGU CUGUA ACGU
miRNA 3' AA 5'
target: SLC6A8
length: 266
miRNA : piR-hsa-13643
length: 27
mfe: -30.1 kcal/mol
p-value: 0.030854
position 214
target 5' G UG C GCCAGG G 3'
UUGC UGCU GUCU GACA UGU
AACG AUGG CAGG CUGU ACG
miRNA 3' GG A UG U A U 5'
target: COX19
length: 714
miRNA : piR-hsa-13643
length: 27
mfe: -33.7 kcal/mol
p-value: 0.027636
position 71
target 5' A CCA GCCC AGG G 3'
GCUU GCCGCG CCGGACA GCA
CGAA UGGUGC GGUCUGU CGU
miRNA 3' GGAA A AA 5'
target: CCND3
length: 540
miRNA : piR-hsa-13643
length: 27
mfe: -32.5 kcal/mol
p-value: 0.030858
position 85
target 5' C GC GUGUUCC C CCA G 3'
CC UGCU CCACG UCCAGAC GCA
GG ACGA GGUGC AGGUCUG CGU
miRNA 3' A AU UAA 5'
target: LENG8
length: 393
miRNA : piR-hsa-13643
length: 27
mfe: -30.8 kcal/mol
p-value: 0.041151
position 281
target 5' G GGCG C A A 3'
CC GCU UGCCA GUCCAG CA GCA
GG CGA AUGGU CAGGUC GU CGU
miRNA 3' AA G U AA 5'
target: DEFB127
length: 530
miRNA : piR-hsa-13643
length: 27
mfe: -32.3 kcal/mol
p-value: 0.032809
position 160
target 5' G GGAAUA ACAA G 3'
UGCU ACUAUGU GGACAUUGCA
ACGA UGGUGCA UCUGUAACGU
miRNA 3' GGA A GG 5'
target: MACROD1
length: 1257
miRNA : piR-hsa-13643
length: 27
mfe: -37.0 kcal/mol
p-value: 0.015690
position 696
target 5' C C G AGUG CC G 3'
CC UGCUUACC ACG CCGGAC UGCA
GG ACGAAUGG UGC GGUCUG ACGU
miRNA 3' A A UA 5'
target: MACROD1
length: 403
miRNA : piR-hsa-13643
length: 27
mfe: -37.0 kcal/mol
p-value: 0.002377
position 141
target 5' C C G AGUG CC G 3'
CC UGCUUACC ACG CCGGAC UGCA
GG ACGAAUGG UGC GGUCUG ACGU
miRNA 3' A A UA 5'
target: MACROD1
length: 899
miRNA : piR-hsa-13643
length: 27
mfe: -37.0 kcal/mol
p-value: 0.009417
position 659
target 5' C C G AGUG CC G 3'
CC UGCUUACC ACG CCGGAC UGCA
GG ACGAAUGG UGC GGUCUG ACGU
miRNA 3' A A UA 5'
target: RPS9
length: 1002
miRNA : piR-hsa-13643
length: 27
mfe: -34.7 kcal/mol
p-value: 0.029531
position 733
target 5' A GAAG UCUG GUGG G 3'
CCUUGU GCC CCAGGCAU GCA
GGAACG UGG GGUCUGUA CGU
miRNA 3' AA UGCA A 5'
target: RPS9
length: 798
miRNA : piR-hsa-13643
length: 27
mfe: -34.7 kcal/mol
p-value: 0.021142
position 650
target 5' A GAAG UCUG GUGG G 3'
CCUUGU GCC CCAGGCAU GCA
GGAACG UGG GGUCUGUA CGU
miRNA 3' AA UGCA A 5'
target: RPS9
length: 951
miRNA : piR-hsa-13643
length: 27
mfe: -34.7 kcal/mol
p-value: 0.027391
position 660
target 5' A GAAG UCUG GUGG G 3'
CCUUGU GCC CCAGGCAU GCA
GGAACG UGG GGUCUGUA CGU
miRNA 3' AA UGCA A 5'
target: RPS9
length: 946
miRNA : piR-hsa-13643
length: 27
mfe: -34.7 kcal/mol
p-value: 0.027182
position 655
target 5' A GAAG UCUG GUGG G 3'
CCUUGU GCC CCAGGCAU GCA
GGAACG UGG GGUCUGUA CGU
miRNA 3' AA UGCA A 5'
target: RPS9
length: 856
miRNA : piR-hsa-13643
length: 27
mfe: -34.7 kcal/mol
p-value: 0.023477
position 565
target 5' A GAAG UCUG GUGG G 3'
CCUUGU GCC CCAGGCAU GCA
GGAACG UGG GGUCUGUA CGU
miRNA 3' AA UGCA A 5'
target: ABR
length: 553
miRNA : piR-hsa-13643
length: 27
mfe: -33.9 kcal/mol
p-value: 0.017073
position 229
target 5' G GGG UG G CUGG C 3'
CC UGCU ACC GU CAGACA GC
GG ACGA UGG CA GUCUGU CG
miRNA 3' A A UG G AA U 5'
target: PNCK
length: 557
miRNA : piR-hsa-13643
length: 27
mfe: -32.1 kcal/mol
p-value: 0.038648
position 27
target 5' C GGC C GC U 3'
UGC ACC CG UCCAGACAU UGC
ACG UGG GC AGGUCUGUA ACG
miRNA 3' GGA AA U U 5'
target: SPECC1
length: 462
miRNA : piR-hsa-13643
length: 27
mfe: -31.1 kcal/mol
p-value: 0.045818
position 280
target 5' A AGGGG GC CGGG G 3'
GC GCCACG CCAGAC UGCG
CG UGGUGC GGUCUG ACGU
miRNA 3' GGAA AA A UA 5'
target: KRTAP4-8
length: 588
miRNA : piR-hsa-13643
length: 27
mfe: -31.9 kcal/mol
p-value: 0.045721
position 187
target 5' A C C U 3'
CC UGC UGCCGC CCAGAUG UGCA
GG ACG AUGGUG GGUCUGU ACGU
miRNA 3' A A CA A 5'
target: KRTAP4-11
length: 1180
miRNA : piR-hsa-13643
length: 27
mfe: -34.6 kcal/mol
p-value: 0.038733
position 337
target 5' A C C U 3'
CUUGC UGCCGC CCAGAUG UGCA
GAACG AUGGUG GGUCUGU ACGU
miRNA 3' G A CA A 5'
target: LAMA2
length: 552
miRNA : piR-hsa-13643
length: 27
mfe: -32.3 kcal/mol
p-value: 0.034882
position 29
target 5' C GAG A AAACU GUGUGAG G 3'
UCU GUUUGCCAC GUC GGACA UGCA
[truncated: 54,298 more rows]

## Sheet: result_piR-21238
target: TRBV5-5
length: 350
miRNA : piR-hsa-21238
length: 27
mfe: -32.3 kcal/mol
p-value: 0.030560
position 28
target 5' C U G UU U GAGCAGG CAGUG C 3'
UGGG GCU C UGUCUCC GG CC GACG
ACCC UGA G ACAGAGG CC GG CUGU
miRNA 3' G U A A 5'
target: TRBV5-5
length: 350
miRNA : piR-hsa-21238
length: 27
mfe: -32.2 kcal/mol
p-value: 0.031950
position 144
target 5' C C AAGA G UGGUACCAACA G 3'
UGGG AC GUGU UCC GGUCCUGG
ACCC UG UACA AGG CCAGGACU
miRNA 3' AGG G GU 5'
target: TRBV6-7
length: 344
miRNA : piR-hsa-21238
length: 27
mfe: -31.4 kcal/mol
p-value: 0.045153
position 9
target 5' C U CUGUGUGGCCUUUUC UGUGGGCA AA A 3'
GGGCUCC GUG UCUCC GGUCC UGA
CCUGAGG UAC AGAGG CCAGG ACU
miRNA 3' AC GU 5'
target: TRBV7-6
length: 392
miRNA : piR-hsa-21238
length: 27
mfe: -36.6 kcal/mol
p-value: 0.005430
position 46
target 5' A A UAUGCUGGGU G 3'
UGGG C CCA GUCUCC GGUCCUGG
ACCC G GGU CAGAGG CCAGGACU
miRNA 3' U A A GU 5'
target: TRBV7-6
length: 392
miRNA : piR-hsa-21238
length: 27
mfe: -33.1 kcal/mol
p-value: 0.025627
position 314
target 5' A AC A 3'
GGGA UCCA UCUCC UCUGACG
CCCU AGGU AGAGG GGACUGU
miRNA 3' A G AC CCA 5'
target: TRBV6-8
length: 341
miRNA : piR-hsa-21238
length: 27
mfe: -32.7 kcal/mol
p-value: 0.024973
position 9
target 5' C U CUGUGCGGCCUUUUC UGUGGGCA C UG A 3'
GGGCUCC GUG UCUCC GGUCC G A
CCUGAGG UAC AGAGG CCAGG C U
miRNA 3' AC A UG 5'
target: TRBV7-7
length: 347
miRNA : piR-hsa-21238
length: 27
mfe: -36.7 kcal/mol
p-value: 0.004176
position 1
target 5' A UA UAUGCUGGGU G 3'
UGGG CCA GUCUCC GGUCCUGG
ACCC GGU CAGAGG CCAGGACU
miRNA 3' UGA A GU 5'
target: TRBV7-7
length: 347
miRNA : piR-hsa-21238
length: 27
mfe: -33.1 kcal/mol
p-value: 0.021094
position 269
target 5' A AC A 3'
GGGA UCCA UCUCC UCUGACG
CCCU AGGU AGAGG GGACUGU
miRNA 3' A G AC CCA 5'
target: TRBV7-9
length: 347
miRNA : piR-hsa-21238
length: 27
mfe: -32.8 kcal/mol
p-value: 0.024122
position 310
target 5' G CGG UA U A G 3'
GGGACU CCAUG UCUCUG G CC GCA
CCCUGA GGUAC AGAGGC C GG UGU
miRNA 3' A A AC 5'
target: TRBV7-9
length: 347
miRNA : piR-hsa-21238
length: 27
mfe: -32.3 kcal/mol
p-value: 0.030149
position 21
target 5' C AU C U G G 3'
UGG GGC CUGUGUCUCC GG GGCA
ACC CUG GGUACAGAGG CC CUGU
miRNA 3' A AGGA 5'
target: TRBV11-3
length: 392
miRNA : piR-hsa-21238
length: 27
mfe: -32.4 kcal/mol
p-value: 0.034859
position 355
target 5' G CGG UA U A G 3'
GGGACU CCGUG UCUCUG G CC GCA
CCCUGA GGUAC AGAGGC C GG UGU
miRNA 3' A A AC 5'
target: TRBV15
length: 421
miRNA : piR-hsa-21238
length: 27
mfe: -33.4 kcal/mol
p-value: 0.025017
position 85
target 5' C CUU CUGGAUGGCCCUU UUGGAACA AUGGG G 3'
UGGG CUCCA UGUCUCC GGUC GAU
ACCC GAGGU ACAGAGG CCAG CUG
miRNA 3' U GA U 5'
target: TRBV17
length: 344
miRNA : piR-hsa-21238
length: 27
mfe: -31.3 kcal/mol
p-value: 0.046367
position 23
target 5' G U C U CGGCAG C 3'
GG GAC CUGUGUCUCU GG GACA
CC CUG GGUACAGAGG CC CUGU
miRNA 3' A A AGGA 5'
target: TRBV20-1
length: 413
miRNA : piR-hsa-21238
length: 27
mfe: -32.6 kcal/mol
p-value: 0.034594
position 100
target 5' C G GG G U 3'
UGGG CCA CUCCGG CUUGG
ACCC GGU GAGGCC GGACU
miRNA 3' UGA ACA A GU 5'
target: TRBV28
length: 364
miRNA : piR-hsa-21238
length: 27
mfe: -33.2 kcal/mol
p-value: 0.021792
position 21
target 5' A AAUCAG UC G G CCUUUUGUU U 3'
UGGG GCUCC UGUC U UGG UCCUGGC
ACCC UGAGG ACAG A GCC AGGACUG
miRNA 3' U G U 5'
target: TRGV1
length: 465
miRNA : piR-hsa-21238
length: 27
mfe: -32.2 kcal/mol
p-value: 0.049070
position 17
target 5' A CACU U GAG G G G 3'
GGGAU UCC UGUU U GG CCUGA
CCCUG AGG ACAG G CC GGACU
miRNA 3' A U A G A GU 5'
target: TRGV8
length: 468
miRNA : piR-hsa-21238
length: 27
mfe: -32.2 kcal/mol
p-value: 0.049532
position 18
target 5' A CACU U GAG G A G 3'
GGGAU UCC UGUU U GG CCUGA
CCCUG AGG ACAG G CC GGACU
miRNA 3' A U A G A GU 5'
target: TRBV3-1
length: 391
miRNA : piR-hsa-21238
length: 27
mfe: -32.2 kcal/mol
p-value: 0.038237
position 48
target 5' A CUGCAG UCUGCUGUGUG UGCCUCCUCCAAGCA CUUG C 3'
UGGG GCUCC GUCUUC GGUCC GACA
ACCC UGAGG CAGAGG CCAGG CUGU
miRNA 3' UA A 5'
target: TRBV7-1
length: 380
miRNA : piR-hsa-21238
length: 27
mfe: -34.1 kcal/mol
p-value: 0.015661
position 263
target 5' C U CC GA UC C G 3'
GGGGC UCC GU UCGGU UCUG ACA
CCCUG AGG CA GGCCA GGAC UGU
miRNA 3' A UA GA 5'
target: TRBV7-1
length: 380
miRNA : piR-hsa-21238
length: 27
mfe: -33.3 kcal/mol
p-value: 0.022333
position 54
target 5' C CAG UA U G G 3'
UGGG CCA UGUCUCC GG GGCA
ACCC GGU ACAGAGG CC CUGU
miRNA 3' UGA AGGA 5'
target: TRBV6-2
length: 392
miRNA : piR-hsa-21238
length: 27
mfe: -33.8 kcal/mol
p-value: 0.018816
position 57
target 5' C G G GGCCUUUUCUC UG G 3'
GGGCUCC UGU CU UGG UCCUG G
CCUGAGG ACA GA GCC AGGAC U
miRNA 3' AC U G UG 5'
target: AC234635.1
length: 424
miRNA : piR-hsa-21238
length: 27
mfe: -33.8 kcal/mol
p-value: 0.021330
position 89
target 5' C G G GGCCUUUUCUC UG G 3'
GGGCUCC UGU CU UGG UCCUG G
CCUGAGG ACA GA GCC AGGAC U
miRNA 3' AC U G UG 5'
target: TRBV7-2
length: 386
miRNA : piR-hsa-21238
length: 27
mfe: -33.1 kcal/mol
p-value: 0.025012
position 307
target 5' G A AC A 3'
GGGG UCC GUCUCC UCUGACG
CCCU AGG CAGAGG GGACUGU
miRNA 3' A G UA CCA 5'
target: TRBV7-2
length: 386
miRNA : piR-hsa-21238
length: 27
mfe: -32.8 kcal/mol
p-value: 0.028549
position 60
target 5' C UGGC U G G 3'
UGGG CUUC UGUCUCC GG GGCA
ACCC GAGG ACAGAGG CC CUGU
miRNA 3' U U AGGA 5'
target: TRBV6-4
length: 365
miRNA : piR-hsa-21238
length: 27
mfe: -31.8 kcal/mol
p-value: 0.040689
position 83
target 5' C CAC GGCACCAACA A A G 3'
UGGGAU CCA UCUC G UCCUGGCA
ACCCUG GGU AGAG C AGGACUGU
miRNA 3' A AC G C 5'
target: TRBV7-3
length: 397
miRNA : piR-hsa-21238
length: 27
mfe: -32.4 kcal/mol
p-value: 0.035542
position 360
target 5' G CAG UA U A G 3'
GGGACU CCGUG UCUCUG G CC GCA
CCCUGA GGUAC AGAGGC C GG UGU
miRNA 3' A A AC 5'
target: TRBV11-1
length: 364
miRNA : piR-hsa-21238
length: 27
mfe: -32.8 kcal/mol
p-value: 0.026032
position 327
target 5' G CGG UA U A G 3'
GGGACU CCAUG UCUCUG G CC GCA
CCCUGA GGUAC AGAGGC C GG UGU
miRNA 3' A A AC 5'
target: TRBV7-4
length: 347
miRNA : piR-hsa-21238
length: 27
mfe: -33.3 kcal/mol
p-value: 0.019288
position 172
target 5' C AGG AGA U 3'
UGGGGC G CUC GGUUCUGAC
ACCCUG C GAG CCAGGACUG
miRNA 3' AGGUA A G U 5'
target: TRBV7-4
length: 347
miRNA : piR-hsa-21238
length: 27
mfe: -33.1 kcal/mol
p-value: 0.021094
position 1
target 5' A A GG UCUGCUGGGU G 3'
UGGG C CCA CUCC GGUCCUGG
ACCC G GGU GAGG CCAGGACU
miRNA 3' U A ACA GU 5'
target: TRAV1-1
length: 392
miRNA : piR-hsa-21238
length: 27
mfe: -31.9 kcal/mol
p-value: 0.043383
position 30
target 5' G GCAGUG GG A UA CA G 3'
GGGAU CCA CUC UGG UCCUG GCA
CCCUG GGU GAG GCC AGGAC UGU
miRNA 3' A A ACA 5'
target: TRBV5-5
length: 350
miRNA : piR-hsa-21238
length: 27
mfe: -32.3 kcal/mol
p-value: 0.030424
position 28
target 5' C U G UU U AGCAGGC AGUG C 3'
UGGG GCU C UGUCUCC GGU CC GACG
ACCC UGA G ACAGAGG CCA GG CUGU
miRNA 3' G U A 5'
target: TRBV5-5
length: 350
miRNA : piR-hsa-21238
length: 27
mfe: -32.2 kcal/mol
p-value: 0.031950
position 144
target 5' C C AAGA G UGGUACCAACA G 3'
UGGG AC GUGU UCC GGUCCUGG
ACCC UG UACA AGG CCAGGACU
miRNA 3' AGG G GU 5'
target: TRBV7-6
length: 392
miRNA : piR-hsa-21238
length: 27
mfe: -36.6 kcal/mol
p-value: 0.005430
position 46
target 5' A A UAUGCUGGGU G 3'
UGGG C CCA GUCUCC GGUCCUGG
ACCC G GGU CAGAGG CCAGGACU
miRNA 3' U A A GU 5'
target: TRBV7-6
length: 392
miRNA : piR-hsa-21238
length: 27
mfe: -33.2 kcal/mol
p-value: 0.024522
position 314
target 5' A AC A 3'
GGGA UCC GUCUCC UCUGACG
CCCU AGG CAGAGG GGACUGU
miRNA 3' A G UA CCA 5'
target: TRBV6-8
length: 407
miRNA : piR-hsa-21238
length: 27
mfe: -32.6 kcal/mol
p-value: 0.034425
position 75
target 5' C U CUGUGCGGCCUUUUC UGUGGGCA A UG A 3'
GGGCUCC GUG UCUCC GGUCC G A
CCUGAGG UAC AGAGG CCAGG C U
miRNA 3' AC A UG 5'
target: TRBV7-7
length: 347
miRNA : piR-hsa-21238
length: 27
mfe: -36.7 kcal/mol
p-value: 0.004176
position 1
target 5' A UA UAUGCUGGGU G 3'
UGGG CCA GUCUCC GGUCCUGG
ACCC GGU CAGAGG CCAGGACU
miRNA 3' UGA A GU 5'
target: TRBV7-7
length: 347
miRNA : piR-hsa-21238
length: 27
mfe: -33.1 kcal/mol
p-value: 0.021094
position 269
target 5' A AC A 3'
GGGA UCCA UCUCC UCUGACG
CCCU AGGU AGAGG GGACUGU
miRNA 3' A G AC CCA 5'
target: AC233282.2
length: 344
miRNA : piR-hsa-21238
length: 27
mfe: -32.6 kcal/mol
p-value: 0.026482
position 9
target 5' C U CUGUGUGGCCUUUUC UGUGGGCA A UG A 3'
GGGCUCC GUG UCUCC GGUCC G A
CCUGAGG UAC AGAGG CCAGG C U
miRNA 3' AC A UG 5'
target: AC233282.2
length: 344
miRNA : piR-hsa-21238
length: 27
mfe: -32.4 kcal/mol
p-value: 0.028443
position 178
target 5' A GAGGCGCAU UACUCA GCUG AUCA A 3'
UGGGGCU UCAU GUU CUGGU CUGACA
ACCCUGA GGUA CAG GGCCA GACUGU
miRNA 3' A G 5'
target: AC233282.1
length: 347
miRNA : piR-hsa-21238
length: 27
mfe: -33.1 kcal/mol
p-value: 0.021094
position 1
target 5' A A GG UCUGCUGGGU G 3'
UGGG C CCA CUCC GGUCCUGG
ACCC G GGU GAGG CCAGGACU
miRNA 3' U A ACA GU 5'
target: AC229888.1
length: 478
miRNA : piR-hsa-21238
length: 27
mfe: -33.7 kcal/mol
p-value: 0.026854
position 313
target 5' C C GUUC UUU A A 3'
UGGG CUCCA CUCC GGU UGACG
ACCC GAGGU GAGG CCA ACUGU
miRNA 3' U ACA GG 5'
target: AC229888.1
length: 478
miRNA : piR-hsa-21238
length: 27
mfe: -33.4 kcal/mol
p-value: 0.030557
position 136
target 5' A GG UC G C 3'
UGGGAC CCA CUCC UUCUG GCA
ACCCUG GGU GAGG AGGAC UGU
miRNA 3' A ACA CC 5'
target: TRBV7-9
length: 347
miRNA : piR-hsa-21238
length: 27
mfe: -32.8 kcal/mol
p-value: 0.024122
position 310
target 5' G CGG UA U A G 3'
GGGACU CCAUG UCUCUG G CC GCA
CCCUGA GGUAC AGAGGC C GG UGU
miRNA 3' A A AC 5'
target: TRBV7-9
length: 347
miRNA : piR-hsa-21238
length: 27
mfe: -32.3 kcal/mol
p-value: 0.030149
position 21
target 5' C AU C U G G 3'
UGG GGC CUGUGUCUCC GG GGCA
ACC CUG GGUACAGAGG CC CUGU
miRNA 3' A AGGA 5'
target: TRBV11-3
length: 392
miRNA : piR-hsa-21238
length: 27
mfe: -32.4 kcal/mol
p-value: 0.034859
position 355
target 5' G CGG UA U A G 3'
GGGACU CCGUG UCUCUG G CC GCA
CCCUGA GGUAC AGAGGC C GG UGU
miRNA 3' A A AC 5'
target: TRAV9-1
length: 338
miRNA : piR-hsa-21238
length: 27
mfe: -31.6 kcal/mol
p-value: 0.039517
position 47
target 5' G A A GAGAU AG A G 3'
GGGA UC AUG UC UGGUCC GACA
CCCU AG UAC AG GCCAGG CUGU
miRNA 3' A G G AG A 5'
target: TRBV15
length: 421
miRNA : piR-hsa-21238
length: 27
mfe: -33.4 kcal/mol
p-value: 0.025017
position 85
target 5' C CUU CUGGAUGGCCCUU UUGGAACA AUGGG G 3'
UGGG CUCCA UGUCUCC GGUC GAU
ACCC GAGGU ACAGAGG CCAG CUG
miRNA 3' U GA U 5'
target: TRBV17
length: 344
miRNA : piR-hsa-21238
length: 27
mfe: -31.3 kcal/mol
p-value: 0.046367
position 23
target 5' G U C U CGGCAG C 3'
GG GAC CUGUGUCUCU GG GACA
CC CUG GGUACAGAGG CC CUGU
miRNA 3' A A AGGA 5'
target: TRBV20-1
length: 413
miRNA : piR-hsa-21238
length: 27
mfe: -32.6 kcal/mol
p-value: 0.034594
position 100
target 5' C G GG G U 3'
UGGG CCA CUCCGG CUUGG
ACCC GGU GAGGCC GGACU
miRNA 3' UGA ACA A GU 5'
target: TRAV8-2
length: 566
miRNA : piR-hsa-21238
length: 27
mfe: -33.4 kcal/mol
p-value: 0.039294
position 408
target 5' A G A 3'
GGACUCCA CUUC UCCUGA
CCUGAGGU GAGG AGGACU
miRNA 3' AC ACA CC GU 5'
target: TRAV8-4
length: 469
miRNA : piR-hsa-21238
length: 27
mfe: -33.4 kcal/mol
p-value: 0.029686
position 311
target 5' A G A 3'
GGACUCCA CUUC UCCUGA
CCUGAGGU GAGG AGGACU
miRNA 3' AC ACA CC GU 5'
target: TRAV8-6
length: 561
miRNA : piR-hsa-21238
length: 27
mfe: -33.4 kcal/mol
p-value: 0.038788
position 403
target 5' A G A 3'
GGACUCCA CUUC UCCUGA
CCUGAGGU GAGG AGGACU
miRNA 3' AC ACA CC GU 5'
target: TRAV16
length: 329
miRNA : piR-hsa-21238
length: 27
mfe: -32.1 kcal/mol
p-value: 0.030310
position 140
target 5' C G AAC U UAUGUCCAGUAC A A 3'
UGGGA UCC UG UC UCUGG UCC GACA
ACCCU AGG AC AG AGGCC AGG CUGU
miRNA 3' G U A 5'
target: TRAV27
length: 425
miRNA : piR-hsa-21238
length: 27
mfe: -33.2 kcal/mol
p-value: 0.027827
position 64
target 5' A CAUGUCCA GA AGAAAGACAAGA A 3'
GGGGC CCAUGU U UGGUCCUGA
CCCUG GGUACA G GCCAGGACU
miRNA 3' A A GA GU 5'
target: TRAV29DV5
length: 469
miRNA : piR-hsa-21238
length: 27
mfe: -35.2 kcal/mol
p-value: 0.013610
position 108
target 5' A GG U G U 3'
GGGAU CCAUG CUCC GG GGCA
CCCUG GGUAC GAGG CC CUGU
miRNA 3' A A A AGGA 5'
target: TRAV38-1
length: 353
miRNA : piR-hsa-21238
length: 27
mfe: -33.0 kcal/mol
p-value: 0.022677
position 33
target 5' C U U CC UUGAA CAUGGC A G 3'
G GG CUCCA UGUC UCCGG CC GACA
C CC GAGGU ACAG AGGCC GG CUGU
miRNA 3' A U A A 5'
target: TRBV28
length: 364
miRNA : piR-hsa-21238
length: 27
mfe: -33.2 kcal/mol
p-value: 0.021792
position 21
target 5' A AAUCAG UC G G CCUUUUGUU U 3'
UGGG GCUCC UGUC U UGG UCCUGGC
ACCC UGAGG ACAG A GCC AGGACUG
miRNA 3' U G U 5'
target: TRBV3-1
length: 391
miRNA : piR-hsa-21238
length: 27
mfe: -32.2 kcal/mol
p-value: 0.038237
position 48
target 5' A CUGCAG UCUGCUGUGUG UGCCUCCUCCAAGCA CUUG C 3'
UGGG GCUCC GUCUUC GGUCC GACA
ACCC UGAGG CAGAGG CCAGG CUGU
miRNA 3' UA A 5'
target: TRBV7-1
length: 380
miRNA : piR-hsa-21238
length: 27
mfe: -34.1 kcal/mol
p-value: 0.015661
position 263
target 5' C U CC GA UC C G 3'
GGGGC UCC GU UCGGU UCUG ACA
CCCUG AGG CA GGCCA GGAC UGU
miRNA 3' A UA GA 5'
target: TRBV7-1
length: 380
miRNA : piR-hsa-21238
length: 27
mfe: -33.3 kcal/mol
p-value: 0.022333
position 54
target 5' C CAG UA U G G 3'
UGGG CCA UGUCUCC GG GGCA
ACCC GGU ACAGAGG CC CUGU
miRNA 3' UGA AGGA 5'
target: TRBV6-2
length: 424
miRNA : piR-hsa-21238
length: 27
mfe: -33.8 kcal/mol
p-value: 0.021330
position 89
target 5' C G G GGCCUUUUCUC UG G 3'
GGGCUCC UGU CU UGG UCCUG G
CCUGAGG ACA GA GCC AGGAC U
miRNA 3' AC U G UG 5'
target: TRBV7-2
length: 394
miRNA : piR-hsa-21238
length: 27
mfe: -33.1 kcal/mol
p-value: 0.025833
position 315
target 5' G A AC A 3'
GGGG UCC GUCUCC UCUGACG
CCCU AGG CAGAGG GGACUGU
miRNA 3' A G UA CCA 5'
target: TRBV7-2
length: 394
miRNA : piR-hsa-21238
length: 27
mfe: -32.8 kcal/mol
p-value: 0.029477
position 68
target 5' C UGGC U G G 3'
UGGG CUUC UGUCUCC GG GGCA
ACCC GAGG ACAGAGG CC CUGU
miRNA 3' U U AGGA 5'
target: TRBV6-4
length: 365
miRNA : piR-hsa-21238
length: 27
mfe: -31.8 kcal/mol
p-value: 0.040689
position 83
target 5' C CAC GGCACCAACA A A G 3'
UGGGAU CCA UCUC G UCCUGGCA
ACCCUG GGU AGAG C AGGACUGU
miRNA 3' A AC G C 5'
target: TRBV7-3
length: 397
miRNA : piR-hsa-21238
length: 27
mfe: -31.9 kcal/mol
p-value: 0.044215
position 360
target 5' G AGCCG A U A G 3'
GGGACUC CGU UCUCCG G CC GCA
CCCUGAG GUA AGAGGC C GG UGU
miRNA 3' A C A AC 5'
target: TRBV11-1
length: 364
miRNA : piR-hsa-21238
length: 27
mfe: -32.8 kcal/mol
p-value: 0.026032
position 327
target 5' G CGG UA U A G 3'
GGGACU CCAUG UCUCUG G CC GCA
CCCUGA GGUAC AGAGGC C GG UGU
miRNA 3' A A AC 5'
target: TRBV7-4
length: 347
miRNA : piR-hsa-21238
length: 27
mfe: -33.3 kcal/mol
p-value: 0.019288
position 172
target 5' C AGG AGA U 3'
UGGGGC G CUC GGUUCUGAC
ACCCUG C GAG CCAGGACUG
miRNA 3' AGGUA A G U 5'
target: TRBV7-4
length: 347
miRNA : piR-hsa-21238
length: 27
mfe: -33.1 kcal/mol
p-value: 0.021094
position 1
target 5' A A GG UCUGCUGGGU G 3'
UGGG C CCA CUCC GGUCCUGG
ACCC G GGU GAGG CCAGGACU
miRNA 3' U A ACA GU 5'
target: CYP2D7
length: 564
miRNA : piR-hsa-21238
length: 27
mfe: -33.8 kcal/mol
p-value: 0.033025
position 452
target 5' G AGAGACCGCGUU GG C GUG G 3'
GGGAC UCCGUG C CCGG GACA
CCCUG AGGUAC G GGCC CUGU
miRNA 3' A A A AGGA 5'
target: CYP2D7
length: 564
miRNA : piR-hsa-21238
length: 27
mfe: -33.8 kcal/mol
p-value: 0.033025
position 452
target 5' G AGAGACCGCGUU GG C GUG G 3'
GGGAC UCCGUG C CCGG GACA
CCCUG AGGUAC G GGCC CUGU
miRNA 3' A A A AGGA 5'
target: GKN3P
length: 546
miRNA : piR-hsa-21238
length: 27
mfe: -36.7 kcal/mol
p-value: 0.009123
position 508
target 5' A UCA G UGAGAC G 3'
UGGGACUCU UCU CGG UCCUGG
ACCCUGAGG AGA GCC AGGACU
miRNA 3' UAC G GU 5'
target: OR4Q2
length: 921
miRNA : piR-hsa-21238
length: 27
mfe: -34.5 kcal/mol
p-value: 0.049693
position 608
target 5' G UUGAU CCA UUUGU G U 3'
UGGG CUCCA UCUCC GGU CUGAU
ACCC GAGGU AGAGG CCA GACUG
miRNA 3' U AC G U 5'
target: AC064853.2
length: 279
miRNA : piR-hsa-21238
length: 27
mfe: -30.6 kcal/mol
p-value: 0.046002
position 47
target 5' G U G G GUGG G GG U 3'
UGG GGCU C GUG CU CGGU UGGC
ACC CUGA G UAC GA GCCA ACUG
miRNA 3' G A G GG U 5'
target: CD300H
length: 462
miRNA : piR-hsa-21238
length: 27
mfe: -32.9 kcal/mol
p-value: 0.035995
position 14
target 5' C G CUGCCUUCAG C U 3'
UGGGGCU CCAUG CUCUG UCCU
ACCCUGA GGUAC GAGGC AGGA
miRNA 3' A C CUGU 5'
target: CD300H
length: 462
miRNA : piR-hsa-21238
length: 27
mfe: -32.9 kcal/mol
p-value: 0.035995
position 14
target 5' C G CUGCCUUCAG C U 3'
UGGGGCU CCAUG CUCUG UCCU
ACCCUGA GGUAC GAGGC AGGA
miRNA 3' A C CUGU 5'
target: NAT8B
length: 765
miRNA : piR-hsa-21238
length: 27
mfe: -38.3 kcal/mol
p-value: 0.007922
position 175
target 5' U GGGGCCCUUGCCCU UG C A 3'
UGGG ACUCC GUCUCUGG UCCUGG
ACCC UGAGG CAGAGGCC AGGACU
miRNA 3' UA GU 5'
target: FCGR2C
length: 566
miRNA : piR-hsa-21238
length: 27
mfe: -33.3 kcal/mol
p-value: 0.040982
position 486
target 5' A A A ACAUG GGGG U 3'
G GGACUCUGUG CUCUG CC GAC
C CCUGAGGUAC GAGGC GG CUG
miRNA 3' A A CA A U 5'
target: FCGR2C
length: 554
miRNA : piR-hsa-21238
length: 27
mfe: -33.3 kcal/mol
p-value: 0.039722
position 285
target 5' A A A ACAUG GGGG U 3'
G GGACUCUGUG CUCUG CC GAC
C CCUGAGGUAC GAGGC GG CUG
miRNA 3' A A CA A U 5'
target: FCGR2C
length: 567
miRNA : piR-hsa-21238
length: 27
mfe: -33.3 kcal/mol
p-value: 0.041087
position 211
target 5' A A A ACAUG GGGG U 3'
G GGACUCUGUG CUCUG CC GAC
C CCUGAGGUAC GAGGC GG CUG
miRNA 3' A A CA A U 5'
target: FCGR2C
length: 527
miRNA : piR-hsa-21238
length: 27
mfe: -33.3 kcal/mol
p-value: 0.036911
position 168
target 5' A A A ACAUG GGGG U 3'
G GGACUCUGUG CUCUG CC GAC
C CCUGAGGUAC GAGGC GG CUG
miRNA 3' A A CA A U 5'
target: IFNL4
length: 1132
miRNA : piR-hsa-21238
length: 27
mfe: -35.3 kcal/mol
p-value: 0.047849
position 979
target 5' A AG GCCUGAG A C 3'
GGGACUC GUG UUUC GUUCUGAC
CCCUGAG UAC GAGG CAGGACUG
miRNA 3' A G A C U 5'
target: OR13C7
length: 959
miRNA : piR-hsa-21238
length: 27
mfe: -34.9 kcal/mol
p-value: 0.045496
position 600
target 5' A GUGACCAAUGUGAUC UGGGG UU U 3'
UGGGA UUCC GUC CCGGUUCUG CA
ACCCU GAGG CAG GGCCAGGAC GU
miRNA 3' UA A U 5'
target: CYP2D7
length: 564
miRNA : piR-hsa-21238
length: 27
mfe: -33.8 kcal/mol
p-value: 0.033025
position 452
target 5' G AGAGACCGCGUU GG C GUG G 3'
GGGAC UCCGUG C CCGG GACA
CCCUG AGGUAC G GGCC CUGU
miRNA 3' A A A AGGA 5'
target: PKD1L2
length: 574
miRNA : piR-hsa-21238
length: 27
mfe: -34.0 kcal/mol
p-value: 0.031153
position 446
target 5' A AG C C AAA A CCUAU A 3'
GGGGC CCA GU CUC GGU CCUG GCA
CCCUG GGU CA GAG CCA GGAC UGU
miRNA 3' A A A G 5'
target: CYP2D7
length: 564
miRNA : piR-hsa-21238
length: 27
mfe: -33.8 kcal/mol
p-value: 0.033025
position 452
target 5' G AGAGACCGCGUU GG C GUG G 3'
GGGAC UCCGUG C CCGG GACA
CCCUG AGGUAC G GGCC CUGU
miRNA 3' A A A AGGA 5'
target: TRAC
length: 978
miRNA : piR-hsa-21238
length: 27
mfe: -35.2 kcal/mol
p-value: 0.040824
position 773
target 5' G UU UGGG A G 3'
UGGG CUCU CUCU GGUCCUG CA
ACCC GAGG GAGG CCAGGAC GU
miRNA 3' U UACA U 5'
target: IGHJ6
length: 63
miRNA : piR-hsa-21238
length: 27
mfe: -27.1 kcal/mol
p-value: 0.019153
position 38
target 5' A ACG A UC C 3'
GGGAC C GUC CCG UCCU
CCCUG G CAG GGC AGGA
miRNA 3' A A GUA A C CUGU 5'
target: IGHJ5
length: 51
miRNA : piR-hsa-21238
length: 27
mfe: -25.7 kcal/mol
p-value: 0.027355
position 25
target 5' A A CUG A UC C 3'
GGGA CC GUC CCG UCCU
CCCU GG CAG GGC AGGA
miRNA 3' A GA UA A C CUGU 5'
target: IGHJ4
length: 48
miRNA : piR-hsa-21238
length: 27
mfe: -25.7 kcal/mol
p-value: 0.024195
position 22
target 5' A A CUG A UC C 3'
GGGA CC GUC CCG UCCU
CCCU GG CAG GGC AGGA
miRNA 3' A GA UA A C CUGU 5'
target: IGHJ2
length: 53
miRNA : piR-hsa-21238
length: 27
mfe: -32.8 kcal/mol
p-value: 0.000527
position 4
target 5' C U A GG G C 3'
UGG ACUUCG UCUCUGG CC UGGCA
ACC UGAGGU AGAGGCC GG ACUGU
miRNA 3' C AC A 5'
target: IGHJ1
length: 52
miRNA : piR-hsa-21238
length: 27
mfe: -25.3 kcal/mol
p-value: 0.035600
position 18
target 5' C CAGGGCA CUG A UC C 3'
UGGGGC CC GUC CCG UCCU
ACCCUG GG CAG GGC AGGA
miRNA 3' A UA A C CUGU 5'
target: IGLJ1
length: 127
miRNA : piR-hsa-21238
length: 27
mfe: -30.0 kcal/mol
p-value: 0.015848
position 58
target 5' C GUUUUGGUCUGAGC AGUCACUGUGU AA G 3'
GGGG CUC UAUGUCUUCGG CUGG
CCCU GAG GUACAGAGGCC GACU
miRNA 3' A AG GU 5'
target: IGLJ2
length: 175
miRNA : piR-hsa-21238
length: 27
mfe: -28.9 kcal/mol
p-value: 0.048277
position 12
target 5' A U CUCAUGAGCAG C A A GCCA C 3'
UG GGACUCC AUG C CC GG CUGGC
AC CCUGAGG UAC G GG CC GACUG
miRNA 3' A A AG U 5'
target: IGLJ6
length: 70
miRNA : piR-hsa-21238
length: 27
mfe: -26.9 kcal/mol
p-value: 0.026282
position 16
target 5' A UUAUA ACAGUGUA G AG C 3'
GGG UC AUGU UUCGG C UGGCA
CCC AG UACA AGGCC G ACUGU
miRNA 3' A UG G G A G 5'
target: IGHJ6
length: 61
miRNA : piR-hsa-21238
length: 27
mfe: -27.1 kcal/mol
p-value: 0.017948
position 36
target 5' A ACG A UC C 3'
GGGAC C GUC CCG UCCU
CCCUG G CAG GGC AGGA
miRNA 3' A A GUA A C CUGU 5'
target: IGHJ5
length: 49
miRNA : piR-hsa-21238
length: 27
mfe: -25.7 kcal/mol
p-value: 0.025233
position 23
target 5' A A CUG A UC C 3'
GGGA CC GUC CCG UCCU
CCCU GG CAG GGC AGGA
miRNA 3' A GA UA A C CUGU 5'
target: IGHJ4
length: 46
miRNA : piR-hsa-21238
length: 27
mfe: -25.7 kcal/mol
p-value: 0.022166
position 20
target 5' A A CUG A UC C 3'
GGGA CC GUC CCG UCCU
CCCU GG CAG GGC AGGA
miRNA 3' A GA UA A C CUGU 5'
target: IGHJ2
length: 52
miRNA : piR-hsa-21238
length: 27
mfe: -32.8 kcal/mol
p-value: 0.000502
position 3
target 5' C U A GG G C 3'
UGG ACUUCG UCUCUGG CC UGGCA
ACC UGAGGU AGAGGCC GG ACUGU
miRNA 3' C AC A 5'
target: IGHJ1
length: 52
miRNA : piR-hsa-21238
length: 27
mfe: -25.3 kcal/mol
p-value: 0.035600
position 18
target 5' C CAGGGCA CUG A UC C 3'
UGGGGC CC GUC CCG UCCU
ACCCUG GG CAG GGC AGGA
miRNA 3' A UA A C CUGU 5'
target: IGHE
length: 1412
miRNA : piR-hsa-21238
length: 27
mfe: -36.3 kcal/mol
p-value: 0.043571
position 68
target 5' C A GCUG C 3'
CUCCGUG CUCUGG CCUGGC
GAGGUAC GAGGCC GGACUG
miRNA 3' ACCCU A A U 5'
target: IGHE
length: 1485
miRNA : piR-hsa-21238
length: 27
mfe: -36.3 kcal/mol
p-value: 0.046550
position 68
target 5' C A GCUG C 3'
CUCCGUG CUCUGG CCUGGC
GAGGUAC GAGGCC GGACUG
miRNA 3' ACCCU A A U 5'
target: IGHE
length: 1412
miRNA : piR-hsa-21238
length: 27
mfe: -36.3 kcal/mol
p-value: 0.043571
position 68
target 5' C A GCUG C 3'
CUCCGUG CUCUGG CCUGGC
GAGGUAC GAGGCC GGACUG
miRNA 3' ACCCU A A U 5'
target: IGHM
length: 1686
miRNA : piR-hsa-21238
length: 27
mfe: -40.5 kcal/mol
p-value: 0.011099
position 1467
target 5' A GCUGCC GG GG C 3'
GGGGC UCC GUCU GGUCCUGGC
CCCUG AGG CAGA CCAGGACUG
miRNA 3' A UA GG U 5'
target: IGLV2-33
length: 412
miRNA : piR-hsa-21238
length: 27
mfe: -34.0 kcal/mol
p-value: 0.018664
position 203
target 5' G AUGA U A A 3'
GGGAUU UCAUGUCU CUGGU CC
CCCUGA GGUACAGA GGCCA GG
miRNA 3' A ACUGU 5'
target: IGLV2-33
length: 412
miRNA : piR-hsa-21238
length: 27
mfe: -34.0 kcal/mol
p-value: 0.018664
position 148
target 5' C GACAG UCACCAUC C 3'
GGGGCUCC UG UCGG UCCUG CA
CCCUGAGG AC GGCC AGGAC GU
miRNA 3' A U AGA U 5'
target: IGLV2-33
length: 412
miRNA : piR-hsa-21238
length: 27
mfe: -32.7 kcal/mol
p-value: 0.033575
position 64
target 5' C CUCU UCCUCACC UCACUCAGGGCACAG G 3'
UGGG GCUCC CUCC GGUCCUGG
ACCC UGAGG GAGG CCAGGACU
miRNA 3' UACA GU 5'
target: IGLV3-32
length: 383
miRNA : piR-hsa-21238
length: 27
mfe: -32.7 kcal/mol
p-value: 0.029475
position 98
target 5' C CCA AGGUGCCUGCA G UGG A 3'
UGGG ACUC GUGUCU UGG CCU GACA
ACCC UGAG UACAGA GCC GGA CUGU
miRNA 3' G G A 5'
target: IGHV3-66
length: 427
miRNA : piR-hsa-21238
length: 27
mfe: -33.9 kcal/mol
p-value: 0.020646
position 24
target 5' C AGG AU AG C 3'
UGGGAUUCCG UGUUUCC UC UGAU
ACCCUGAGGU ACAGAGG AG ACUG
miRNA 3' CC G U 5'
target: IGHV2-70D
length: 434
miRNA : piR-hsa-21238
length: 27
mfe: -34.2 kcal/mol
p-value: 0.018581
position 121
target 5' C U UAUC G ACCUUGAAGGAG C 3'
UGGG CU CCA GUC UCUGGUCCUG CG
ACCC GA GGU CAG AGGCCAGGAC GU
miRNA 3' U A U 5'
target: IGHV2-70
length: 358
miRNA : piR-hsa-21238
length: 27
mfe: -34.2 kcal/mol
p-value: 0.013571
position 45
target 5' C U UAUC G ACCUUGAGGGAG C 3'
UGGG CU CCA GUC UCUGGUCCUG CG
ACCC GA GGU CAG AGGCCAGGAC GU
miRNA 3' U A U 5'
target: IGHV3-73
length: 437
miRNA : piR-hsa-21238
length: 27
mfe: -35.9 kcal/mol
p-value: 0.008919
position 25
target 5' U CAGC ACUC GA C 3'
UGGGAUUCC UGUCUCC GGU UC GGCA
ACCCUGAGG ACAGAGG CCA GG CUGU
miRNA 3' U A 5'
target: IGHV7-81
length: 405
miRNA : piR-hsa-21238
length: 27
mfe: -32.5 kcal/mol
p-value: 0.035074
position 152
target 5' C C GUGAAG UGCAA C U 3'
UGGGGC UCA GUCUCC GG UUCUGG
ACCCUG GGU CAGAGG CC AGGACU
miRNA 3' A A GU 5'
target: IGHV3-74
length: 587
miRNA : piR-hsa-21238
length: 27
mfe: -34.2 kcal/mol
p-value: 0.029605
position 181
target 5' C CAGC CU G C 3'
UGGGAUUCC UGUUUCUG U CUGAU
ACCCUGAGG ACAGAGGC A GACUG
miRNA 3' U C G U 5'
target: IGHV6-1
length: 417
miRNA : piR-hsa-21238
length: 27
mfe: -32.1 kcal/mol
p-value: 0.043624
position 99
target 5' G UG ACAGGUACAG GCAGCAGUCA AG U 3'
GGG UCC UGUC CU GGUCC GAC
CCC AGG ACAG GG CCAGG CUG
miRNA 3' A UG U A A U 5'
target: IGHV1-2
length: 417
miRNA : piR-hsa-21238
length: 27
mfe: -32.7 kcal/mol
p-value: 0.033609
position 162
target 5' C C GUGAAG UGCAA C A 3'
UGGGGC UCA GUCUCC GG UUCUGG
ACCCUG GGU CAGAGG CC AGGACU
miRNA 3' A A GU 5'
target: AC247036.3
length: 353
miRNA : piR-hsa-21238
length: 27
mfe: -33.2 kcal/mol
p-value: 0.020740
position 100
target 5' G G C AGGA UGUAAG A 3'
GGGA UCU UG UCUCC GGUUCUGG
CCCU AGG AC AGAGG CCAGGACU
miRNA 3' A G U GU 5'
target: IGHV3-16
length: 425
miRNA : piR-hsa-21238
length: 27
mfe: -34.2 kcal/mol
p-value: 0.017968
position 25
target 5' C CAG AUUG AACA A 3'
UGGGAUUCU GUGUUUCU GGUC GCA
ACCCUGAGG UACAGAGG CCAG UGU
miRNA 3' GAC 5'
target: IGHV1OR21-1
length: 353
miRNA : piR-hsa-21238
length: 27
mfe: -32.7 kcal/mol
p-value: 0.025922
position 98
target 5' C C GUGAAG UGCAA C A 3'
UGGGGC UCA GUCUCC GG UUCUGG
ACCCUG GGU CAGAGG CC AGGACU
miRNA 3' A A GU 5'
target: IGHV1-18
length: 412
miRNA : piR-hsa-21238
length: 27
mfe: -32.5 kcal/mol
p-value: 0.036002
position 157
target 5' C C GUGAAG UGCAA C U 3'
UGGGGC UCA GUCUCC GG UUCUGG
ACCCUG GGU CAGAGG CC AGGACU
miRNA 3' A A GU 5'
target: IGHV3-20
length: 415
miRNA : piR-hsa-21238
length: 27
mfe: -32.9 kcal/mol
p-value: 0.030574
position 247
target 5' A GG GUGG AUUAA A 3'
GGGGCU A GUCUCUGGU UUGG
CCCUGA U CAGAGGCCA GACU
miRNA 3' A GG A G GU 5'
target: IGHV3-23
length: 432
miRNA : piR-hsa-21238
length: 27
mfe: -32.4 kcal/mol
p-value: 0.040387
position 319
target 5' A AAGGG A 3'
GACUCCGUG CCGGUUC
CUGAGGUAC GGCCAGG
miRNA 3' ACC AGA ACUGU 5'
target: IGHV1-24
length: 413
miRNA : piR-hsa-21238
length: 27
mfe: -33.1 kcal/mol
p-value: 0.027806
position 158
target 5' C C GUGAAG UGCAA UU G C 3'
UGGGGC UCA GUCUCC GG UCC GAUA
ACCCUG GGU CAGAGG CC AGG CUGU
miRNA 3' A A A 5'
target: IGHV2-26
length: 382
miRNA : piR-hsa-21238
length: 27
mfe: -34.1 kcal/mol
p-value: 0.015797
position 69
target 5' C U UGUC G ACCUUGAAGGAG U U 3'
UGGG CU CCA GUC UCUGGUCCUG GC
ACCC GA GGU CAG AGGCCAGGAC UG
miRNA 3' U A U 5'
target: AC234301.4
length: 391
miRNA : piR-hsa-21238
length: 27
mfe: -31.6 kcal/mol
p-value: 0.049255
position 166
target 5' C U UCAGCAGUGG GUUA U AG A 3'
UGG GGCUCCA UG CUCC GG CUGG
ACC CUGAGGU AC GAGG CC GACU
miRNA 3' A AG GU 5'
target: IGHV3-38
length: 427
miRNA : piR-hsa-21238
length: 27
mfe: -34.2 kcal/mol
p-value: 0.018104
position 23
target 5' U CAG CU AG C 3'
UGGGAUUCC GUGUUUCC UC UGAU
ACCCUGAGG UACAGAGG AG ACUG
miRNA 3' CC G U 5'
target: IGHV5-51
length: 412
miRNA : piR-hsa-21238
length: 27
mfe: -33.2 kcal/mol
p-value: 0.026515
position 159
target 5' G G C AAGA UGUAAG A 3'
GGGA UCU UG UCUCC GGUUCUGG
CCCU AGG AC AGAGG CCAGGACU
miRNA 3' A G U GU 5'
target: IGHV3-53
length: 571
miRNA : piR-hsa-21238
length: 27
mfe: -34.4 kcal/mol
p-value: 0.026103
position 166
target 5' C AGG AUUC GAUCAGCA A C 3'
UGGGAUUCCG UGUUUCC GGU CUG ACA
ACCCUGAGGU ACAGAGG CCA GAC UGU
miRNA 3' G 5'
target: IGHV1-58
length: 414
miRNA : piR-hsa-21238
length: 27
mfe: -33.3 kcal/mol
p-value: 0.025571
position 159
target 5' C C GUGAAG UGCAA C A 3'
UGGGAC UCA GUCUCC GG UUCUGG
ACCCUG GGU CAGAGG CC AGGACU
miRNA 3' A A GU 5'
target: IGHV3-66
length: 429
miRNA : piR-hsa-21238
length: 27
mfe: -33.9 kcal/mol
p-value: 0.020799
position 24
target 5' C AGG AU AG C 3'
UGGGAUUCCG UGUUUCC UC UGAU
ACCCUGAGGU ACAGAGG AG ACUG
miRNA 3' CC G U 5'
target: AC135068.8
length: 353
miRNA : piR-hsa-21238
length: 27
mfe: -32.7 kcal/mol
p-value: 0.025922
position 98
target 5' C C GUGAAG UGCAA C A 3'
UGGGGC UCA GUCUCC GG UUCUGG
ACCCUG GGU CAGAGG CC AGGACU
miRNA 3' A A GU 5'
target: IGHV2-70D
length: 434
miRNA : piR-hsa-21238
length: 27
mfe: -34.2 kcal/mol
p-value: 0.018581
position 121
target 5' C U UAUC G ACCUUGAAGGAG C 3'
UGGG CU CCA GUC UCUGGUCCUG CG
ACCC GA GGU CAG AGGCCAGGAC GU
miRNA 3' U A U 5'
target: AC242528.1
length: 356
miRNA : piR-hsa-21238
length: 27
mfe: -33.1 kcal/mol
p-value: 0.021985
position 101
target 5' C C GUGAAG UGCAA CU G C 3'
UGGGGC UCA GUCUCC GG UCC GAUA
ACCCUG GGU CAGAGG CC AGG CUGU
miRNA 3' A A A 5'
target: IGHV1-69D
length: 411
miRNA : piR-hsa-21238
length: 27
mfe: -33.4 kcal/mol
p-value: 0.024197
position 103
target 5' A UG A A 3'
GG UCCA GUC CC GGUCC
CC AGGU CAG GG CCAGG
miRNA 3' AC UG A A ACUGU 5'
target: IGHV2-70
length: 434
miRNA : piR-hsa-21238
length: 27
mfe: -34.3 kcal/mol
p-value: 0.017786
position 121
target 5' U U UAUC G ACCUUGAAGGAG C 3'
UGGG CU CCA GUC UCUGGUCCUG CG
ACCC GA GGU CAG AGGCCAGGAC GU
miRNA 3' U A U 5'
target: IGHV3-73
length: 439
miRNA : piR-hsa-21238
length: 27
mfe: -35.9 kcal/mol
p-value: 0.008988
position 25
target 5' U CAGC ACUC GA C 3'
UGGGAUUCC UGUCUCC GGU UC GGCA
ACCCUGAGG ACAGAGG CCA GG CUGU
miRNA 3' U A 5'
target: IGHV3-74
length: 589
miRNA : piR-hsa-21238
length: 27
mfe: -34.2 kcal/mol
p-value: 0.029755
position 181
target 5' C CAGC CU G C 3'
UGGGAUUCC UGUUUCUG U CUGAU
ACCCUGAGG ACAGAGGC A GACUG
miRNA 3' U C G U 5'
target: IGLV5-45
length: 397
miRNA : piR-hsa-21238
length: 27
mfe: -33.6 kcal/mol
p-value: 0.020976
position 336
target 5' C GA AUGAGG U 3'
UGGG CUCCA GUCU GG CUGAC
ACCC GAGGU CAGA CC GACUG
miRNA 3' U A GG AG U 5'
target: IGLV1-44
length: 466
miRNA : piR-hsa-21238
length: 27
mfe: -32.5 kcal/mol
p-value: 0.042742
position 203
target 5' C C CG GCAGAGGGUCACCA U A 3'
UGGGAC CC G UCUCU GUUCUGG
ACCCUG GG C AGAGG CAGGACU
miRNA 3' A UA C GU 5'
target: IGLV1-44
length: 466
miRNA : piR-hsa-21238
length: 27
mfe: -32.4 kcal/mol
p-value: 0.045189
position 400
target 5' A U GA A GA U 3'
G GGGCUCCA GUCU GG U GGC
C CCUGAGGU CAGA CC G CUG
miRNA 3' A A GG A GA U 5'
target: IGLV1-44
length: 466
miRNA : piR-hsa-21238
length: 27
mfe: -32.4 kcal/mol
p-value: 0.045189
position 342
target 5' A C ACCGAU C AAGUC C 3'
GGGG UCC UG UCUCUGG UCC UGGCA
CCCU AGG AC AGAGGCC AGG ACUGU
miRNA 3' A G U 5'
target: AC009286.3
length: 369
miRNA : piR-hsa-21238
length: 27
mfe: -33.3 kcal/mol
p-value: 0.021306
position 183
target 5' A G C UAUC G 3'
GGGA UCU UC CCGG UCCUGA
CCCU AGG AG GGCC AGGACU
miRNA 3' A G UAC A GU 5'
target: AC009286.3
length: 369
miRNA : piR-hsa-21238
length: 27
mfe: -31.4 kcal/mol
p-value: 0.049308
position 7
target 5' U UCC U 3'
GGACUCC UCUCC UCCUG C
CCUGAGG AGAGG AGGAC G
miRNA 3' AC UAC CC U U 5'
target: IGLV1-40
length: 407
miRNA : piR-hsa-21238
length: 27
mfe: -32.4 kcal/mol
p-value: 0.036915
position 282
target 5' A C ACCGAU C AAGUC C 3'
GGGG UCC UG UCUCUGG UCC UGGCA
CCCU AGG AC AGAGGCC AGG ACUGU
miRNA 3' A G U 5'
target: IGLV5-37
length: 374
miRNA : piR-hsa-21238
length: 27
mfe: -34.3 kcal/mol
p-value: 0.013957
position 296
target 5' A CUCA GCUCCAG G A 3'
GGGAUUUUA UCUCCGG UCUGA G
CCCUGAGGU AGAGGCC GGACU U
miRNA 3' A AC A G 5'
target: IGLV1-36
length: 393
miRNA : piR-hsa-21238
length: 27
mfe: -32.7 kcal/mol
p-value: 0.030679
position 268
target 5' A U GACCGAU C AAGUC C 3'
GGGG CUCU UCUCUGG UCC UGGCA
CCCU GAGG AGAGGCC AGG ACUGU
miRNA 3' A UAC 5'
target: IGLV1-36
length: 393
miRNA : piR-hsa-21238
length: 27
mfe: -32.4 kcal/mol
p-value: 0.034996
position 326
target 5' A U GA A GA U 3'
G GGGCUCCA GUCU GG U GGC
C CCUGAGGU CAGA CC G CUG
miRNA 3' A A GG A GA U 5'
target: IGLV1-36
length: 393
miRNA : piR-hsa-21238
length: 27
mfe: -32.2 kcal/mol
p-value: 0.038199
position 146
target 5' A U A U A 3'
GGG C CCA UCUCC GUUCUGG
CCC G GGU AGAGG CAGGACU
miRNA 3' A U A AC C GU 5'
target: IGHV1OR15-1
length: 353
miRNA : piR-hsa-21238
length: 27
mfe: -32.7 kcal/mol
p-value: 0.025922
position 98
target 5' C C GUGAAG UGCAA C A 3'
UGGGGC UCA GUCUCC GG UUCUGG
ACCCUG GGU CAGAGG CC AGGACU
miRNA 3' A A GU 5'
target: IGKV4-1
length: 538
miRNA : piR-hsa-21238
length: 27
mfe: -35.2 kcal/mol
p-value: 0.016942
position 400
target 5' C CAU A CG GAA GGUC C 3'
UGGG CU CC G UCCGG CCUGAC
ACCC GA GG C AGGCC GGACUG
miRNA 3' U UA AG A U 5'
target: IGKV4-1
length: 538
miRNA : piR-hsa-21238
length: 27
mfe: -34.1 kcal/mol
p-value: 0.027095
position 233
target 5' G A GAUGACCCA A ACUC U 3'
GGGAC UCGU GUCUCC G CCUGGC
CCCUG GGUA CAGAGG C GGACUG
miRNA 3' A A C A U 5'
target: IGKV1-5
length: 532
miRNA : piR-hsa-21238
length: 27
mfe: -39.6 kcal/mol
p-value: 0.002494
position 209
target 5' C UGC C CAGGUGCCAAAUG U 3'
UGGGGCUCC UG CUCUGG UCC UGACA
ACCCUGAGG AC GAGGCC AGG ACUGU
miRNA 3' U A 5'
target: IGKV1-6
length: 380
miRNA : piR-hsa-21238
length: 27
mfe: -36.8 kcal/mol
p-value: 0.004701
position 57
target 5' C UGC C CAGG C G 3'
UGGGGCUCC UG CUCUGG UCC UG CA
ACCCUGAGG AC GAGGCC AGG AC GU
miRNA 3' U A U 5'
target: IGKV1-8
length: 398
miRNA : piR-hsa-21238
length: 27
mfe: -36.8 kcal/mol
p-value: 0.005102
position 75
target 5' C UGC C CAGG C G 3'
UGGGGCUCC UG CUCUGG UCC UG CA
ACCCUGAGG AC GAGGCC AGG AC GU
miRNA 3' U A U 5'
target: IGKV1-9
length: 409
miRNA : piR-hsa-21238
length: 27
mfe: -39.6 kcal/mol
p-value: 0.001539
position 86
target 5' C UGC C CAGGUGCCAGAUG U 3'
UGGGGCUCC UG CUCUGG UCC UGACA
ACCCUGAGG AC GAGGCC AGG ACUGU
miRNA 3' U A 5'
target: IGKV1-12
length: 398
miRNA : piR-hsa-21238
length: 27
mfe: -37.6 kcal/mol
p-value: 0.003591
position 75
target 5' C UGC CCAGGUUCCAGAUGC U 3'
UGGGGCUCC UG CUCUGGUUC GACA
ACCCUGAGG AC GAGGCCAGG CUGU
miRNA 3' U A A 5'
target: IGKV1-16
length: 378
miRNA : piR-hsa-21238
length: 27
mfe: -38.0 kcal/mol
p-value: 0.002723
position 55
target 5' C UGCUGCUC CA G AGAUG U 3'
UGGGGCUCC UGUUUCC GGU CC UGACA
ACCCUGAGG ACAGAGG CCA GG ACUGU
miRNA 3' U 5'
target: IGKV1-17
length: 378
miRNA : piR-hsa-21238
length: 27
mfe: -40.4 kcal/mol
p-value: 0.000917
position 55
target 5' C UGC CCAGGUGCCAGGUG U 3'
UGGGGCUCC UG CUCUGGUUC UGACA
ACCCUGAGG AC GAGGCCAGG ACUGU
miRNA 3' U A 5'
target: IGKV2-24
length: 390
miRNA : piR-hsa-21238
length: 27
mfe: -36.0 kcal/mol
p-value: 0.007028
position 52
target 5' C G UA GUC A 3'
UGGGGCU C AUG CUCUGG CCUGG
ACCCUGA G UAC GAGGCC GGACU
miRNA 3' G A A GU 5'
target: IGKV1-27
length: 382
miRNA : piR-hsa-21238
length: 27
mfe: -40.2 kcal/mol
p-value: 0.001033
position 59
target 5' C UGC C CAGAUACCAGAUG U 3'
UGGGACUCC UG CUCUGG UCC UGACA
ACCCUGAGG AC GAGGCC AGG ACUGU
miRNA 3' U A 5'
target: IGKV2-28
length: 390
miRNA : piR-hsa-21238
length: 27
mfe: -38.2 kcal/mol
p-value: 0.002637
position 253
target 5' U AUCGG C GGUC G 3'
UGGG UUCUA G CUCCGG CCUGACA
ACCC GAGGU C GAGGCC GGACUGU
miRNA 3' U A A A 5'
target: IGKV2-28
length: 390
miRNA : piR-hsa-21238
length: 27
mfe: -37.3 kcal/mol
p-value: 0.003939
position 52
target 5' C GCUGCUAAU GG A A UG G 3'
UGGG GCUCU GUCUCUGG UCC G G
ACCC UGAGG CAGAGGCC AGG C U
miRNA 3' UA A UG 5'
target: IGKV2-30
length: 390
miRNA : piR-hsa-21238
length: 27
mfe: -34.2 kcal/mol
p-value: 0.015633
position 52
target 5' C G UA G CAG C 3'
UGGGGCU C AUG CUCU GGUCC GAU
ACCCUGA G UAC GAGG CCAGG CUG
miRNA 3' G A A U 5'
target: IGKV2-30
length: 390
miRNA : piR-hsa-21238
length: 27
mfe: -32.3 kcal/mol
p-value: 0.036137
position 265
target 5' C G CA G 3'
GGGACUCUG GGUCC GACA
CCCUGAGGU CCAGG CUGU
miRNA 3' A ACAGAGG A 5'
target: IGKV1-33
length: 382
miRNA : piR-hsa-21238
length: 27
mfe: -38.4 kcal/mol
p-value: 0.002311
position 59
target 5' C UGC C CAGGUGCCAGAUG U 3'
UGGGGCUCC UG CUCUGG UCU UGACA
ACCCUGAGG AC GAGGCC AGG ACUGU
miRNA 3' U A 5'
target: IGKV1-37
length: 398
miRNA : piR-hsa-21238
length: 27
mfe: -39.6 kcal/mol
p-value: 0.001461
position 75
target 5' C UAC G CAGGUGCCAGAUG U 3'
UGGGGCUCC UG CUCUG GUCC UGACA
ACCCUGAGG AC GAGGC CAGG ACUGU
miRNA 3' U A 5'
target: IGKV1-39
length: 398
miRNA : piR-hsa-21238
length: 27
mfe: -38.3 kcal/mol
p-value: 0.002607
position 75
target 5' C CUA C GAGGUGCCAGAUG U 3'
UGGGGCUCC UG CUCUGG UCC UGACA
ACCCUGAGG AC GAGGCC AGG ACUGU
miRNA 3' U A 5'
target: IGKV1D-39
length: 376
miRNA : piR-hsa-21238
length: 27
mfe: -38.3 kcal/mol
p-value: 0.002347
position 51
target 5' C CUA C GAGGUGCCAGAUG U 3'
UGGGGCUCC UG CUCUGG UCC UGACA
ACCCUGAGG AC GAGGCC AGG ACUGU
miRNA 3' U A 5'
target: IGKV1D-37
length: 353
miRNA : piR-hsa-21238
length: 27
mfe: -39.6 kcal/mol
p-value: 0.001160
position 28
target 5' C UAC G CAGGUGCCAGAUG U 3'
UGGGGCUCC UG CUCUG GUCC UGACA
ACCCUGAGG AC GAGGC CAGG ACUGU
miRNA 3' U A 5'
target: IGKV1D-33
length: 440
miRNA : piR-hsa-21238
length: 27
mfe: -38.4 kcal/mol
p-value: 0.002993
position 117
target 5' C UGC C CAGGUGCCAGAUG U 3'
UGGGGCUCC UG CUCUGG UCU UGACA
ACCCUGAGG AC GAGGCC AGG ACUGU
miRNA 3' U A 5'
target: IGKV2D-30
length: 395
miRNA : piR-hsa-21238
length: 27
mfe: -34.2 kcal/mol
p-value: 0.015962
position 57
target 5' C G UA G CAG C 3'
UGGGGCU C AUG CUCU GGUCC GAU
ACCCUGA G UAC GAGG CCAGG CUG
miRNA 3' G A A U 5'
target: IGKV2D-30
length: 395
miRNA : piR-hsa-21238
length: 27
mfe: -32.5 kcal/mol
p-value: 0.033757
position 269
target 5' C G CA G 3'
UGGGACUCUG GGUCC GACA
ACCCUGAGGU CCAGG CUGU
miRNA 3' ACAGAGG A 5'
target: IGKV2D-29
length: 390
miRNA : piR-hsa-21238
length: 27
mfe: -34.9 kcal/mol
p-value: 0.011461
position 52
target 5' C G UA AUA A 3'
UGGGGCU C AUG CUCUGG CCUGG
ACCCUGA G UAC GAGGCC GGACU
miRNA 3' G A A GU 5'
target: IGKV2D-29
length: 310
miRNA : piR-hsa-21238
length: 27
mfe: -30.9 kcal/mol
p-value: 0.047276
position 17
target 5' A CUC GUCACCCCUG G 3'
GACUCCA UCUCU GUCC GACA
CUGAGGU AGAGG CAGG CUGU
miRNA 3' ACC AC C A 5'
target: IGKV2D-28
length: 396
miRNA : piR-hsa-21238
length: 27
mfe: -38.2 kcal/mol
p-value: 0.002712
position 259
target 5' U AUCGG C GGUC G 3'
UGGG UUCUA G CUCCGG CCUGACA
ACCC GAGGU C GAGGCC GGACUGU
miRNA 3' U A A A 5'
target: IGKV2D-28
length: 396
miRNA : piR-hsa-21238
length: 27
mfe: -37.3 kcal/mol
p-value: 0.004049
position 58
target 5' C GCUGCUAAU GG A A UG G 3'
UGGG GCUCU GUCUCUGG UCC G G
ACCC UGAGG CAGAGGCC AGG C U
miRNA 3' UA A UG 5'
target: IGKV2D-28
length: 306
miRNA : piR-hsa-21238
length: 27
mfe: -38.2 kcal/mol
p-value: 0.001668
position 163
target 5' U AUCGG C GGUC G 3'
UGGG UUCUA G CUCCGG CCUGACA
ACCC GAGGU C GAGGCC GGACUGU
miRNA 3' U A A A 5'
target: IGKV2D-26
length: 390
miRNA : piR-hsa-21238
length: 27
mfe: -36.1 kcal/mol
p-value: 0.006722
position 52
target 5' U G UA GUC A 3'
UGGGGCU C AUG CUCUGG CCUGG
ACCCUGA G UAC GAGGCC GGACU
miRNA 3' G A A GU 5'
target: IGKV2D-26
length: 390
miRNA : piR-hsa-21238
length: 27
mfe: -32.5 kcal/mol
p-value: 0.033102
position 143
target 5' A C CUG A A U G 3'
GG CUCCAUGUC C GGUCU G CA
CC GAGGUACAG G CCAGG C GU
miRNA 3' AC U A G A U 5'
target: IGKV2D-24
length: 390
miRNA : piR-hsa-21238
length: 27
mfe: -36.0 kcal/mol
p-value: 0.007028
position 52
target 5' C G UA GUC A 3'
UGGGGCU C AUG CUCUGG CCUGG
ACCCUGA G UAC GAGGCC GGACU
miRNA 3' G A A GU 5'
target: IGKV1D-16
length: 378
miRNA : piR-hsa-21238
length: 27
mfe: -38.0 kcal/mol
p-value: 0.002723
position 55
target 5' C UGCUGCUC CA G AGAUG U 3'
UGGGGCUCC UGUUUCC GGU CC UGACA
ACCCUGAGG ACAGAGG CCA GG ACUGU
miRNA 3' U 5'
target: IGKV1D-17
length: 532
miRNA : piR-hsa-21238
length: 27
mfe: -37.3 kcal/mol
p-value: 0.006752
position 209
target 5' C UGC C 3'
UGGGGCUCC UG CUCUGGUUC
ACCCUGAGG AC GAGGCCAGG
miRNA 3' U A ACUGU 5'
target: IGHV2OR16-5
length: 358
miRNA : piR-hsa-21238
length: 27
mfe: -34.2 kcal/mol
p-value: 0.013571
position 45
target 5' C U UGUC G ACCUUGAAGGAG C 3'
UGGG CU CCA GUC UCUGGUCCUG CG
[truncated: 507,383+ more rows]
